# Supplementary material
Source: PubMed Central journal article supplement (PMC3306727)
Supplement: NIHMS350958-supplement-1_si_001.pdf [file NIHMS350958-supplement-1_si_001.pdf]

# Expanding the Limits of Isonitrile-Mediated Amidations: On the Remarkable Stereosubtleties of Macrolactam Formation from Synthetic *Seco*-Cyclosporins

Xiangyang Wu,<sup>a</sup> Jennifer L. Stockdill,<sup>a</sup> Peter K. Park,<sup>a</sup> Samuel J. Danishefsky<sup>a,b,\*</sup>

<sup>a</sup>Laboratory for Bioorganic Chemistry, Sloan-Kettering Institute for Cancer Research, 1275 York Avenue, New York, NY 10065

<sup>b</sup>Department of Chemistry, Columbia University, Havemeyer Hall, 3000 Broadway, New York, NY 10027

## SUPPORTING INFORMATION

**General Information.** All commercial materials (Aldrich, Fluka) were used without further purification. All solvents were reagent grade or HPLC grade (Fisher). Anhydrous THF, diethyl ether, CH<sub>2</sub>Cl<sub>2</sub>, toluene, and benzene were passed through column of alumina and used without further drying. <sup>1</sup>H NMR spectra and <sup>13</sup>C NMR spectra were recorded on a Bruker Advance DRX-500 MHz or DRX-600 MHz at ambient temperature unless otherwise stated. Chemical shifts are reported in parts per million relative to residual solvent CDCl<sub>3</sub> (<sup>1</sup>H, 7.26 ppm; <sup>13</sup>C, 77.16 ppm). Multiplicities are reported as follows: s = singlet, d = doublet, t = triplet, m = multiplet, comp. m = complex multiplet, app. = apparent, bs = broad singlet. All <sup>13</sup>C NMR spectra were recorded with complete proton decoupling. \*\**N*-Methylated peptides are typically observed as a mixture of rotamers. The data have been reported in order to provide the maximum amount of information regarding coupling constants, which has necessarily led to integrals reported *following* a group of peaks in some instances.\*\* Variable temperature NMR data recorded on the DRX-600 MHz instrument in CDCl<sub>3</sub> at 10 °C intervals ranging from 24 °C to 54 °C. In spectra below, the higher temperature NMR data is plotted above the lower temperature data. The data are presented to demonstrate the coalescence of the rotamers that begins to occur with increased temperature. The effects are clearest in the *N*-Me regions. Low-resolution mass spectral analyses were performed with a JEOL JMS-DX-303-HF mass spectrometer or Waters Micromass ZQ mass spectrometer. High-resolution mass spectral analyses were performed by the MSKCC core facility staff. All reactions were carried out in oven-dried glassware under an argon or nitrogen atmosphere unless otherwise noted. Analytical TLC was performed on E. Merck silica gel 60 F254 plates and visualized by UV fluorescence quenching and CAM staining. Flash column chromatography was performed on E. Merck silica gel 60 (40–63 mm). Yields refer to chromatographically and spectroscopically pure compounds.

### Preparation of Compounds.

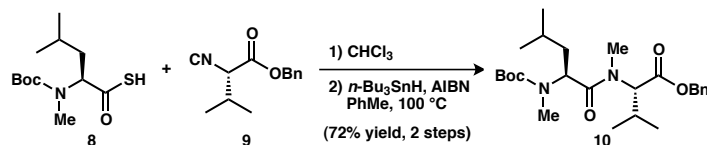

**Boc-MeLeu-MeVal-OBn (10).** To a solution of valine isonitrile **9**<sup>1</sup> (120 mg, 0.55 mmol) in chloroform (3.5 mL) was added *N*-methyl leucine thioacid **8**<sup>2</sup> (144 mg, 0.55 mmol) in chloroform (12 mL) via syringe pump over 3 hours. The reaction mixture was stirred at ambient temperature overnight then concentrated at low pressure to give a yellow oil. This residue was immediately dissolved in toluene (10 mL), and then *n*-Bu<sub>3</sub>SnH (0.70 mL, 2.75 mmol) and AIBN (88 mg, 0.55 mmol) were added. The reaction mixture was heated to  $100^\circ\text{C}$  for 30 min. The volatiles were removed at low pressure, and the residue was purified by flash chromatography (6:1 hexanes/ethyl acetate) to give dipeptide **10** (177 mg, 72% yield).  $[\alpha]_D^{20} = -140.3^\circ$  ( $c = 1.75$ ,  $\text{CHCl}_3$ );  $^1\text{H NMR}$  (600 MHz,  $\text{CDCl}_3$ , mixture of rotamers):  $\delta$  7.37 – 7.27 (m, 5H), [5.25 (d,  $J = 12.2$  Hz), 5.19 (dd,  $J = 12.3, 1.3$  Hz, 1H), 5.15 – 4.92 (m, 2H), 4.87 – 4.78 (m), 4.46 (d,  $J = 10.2$  Hz), 4.22 (d,  $J = 10.4$  Hz), all sum to 4H], [2.95 (s, 1H), 2.92 (s, 1H), 2.84 (s), 2.74 (s, 2H), 2.72 (s), 2.51 (s), 2.50 (s), all sum to 6H], 2.24 (ddq,  $J = 27.5, 10.6, 6.7$  Hz, 1H), [1.70 (m), 1.63 – 1.47 (m), 1.47 – 1.37 (m), all sum to 12H], [1.03 (d,  $J = 6.4$  Hz), 0.98 (app. dd,  $J = 6.5, 2.1$  Hz), 0.95 – 0.86 (m), 0.83 (d,  $J = 6.7$  Hz), 0.81 (d,  $J = 6.8$  Hz), all sum to 12H];  $^{13}\text{C NMR}$  (151 MHz,  $\text{CDCl}_3$ , mixture of rotamers):  $\delta$  172.5, 171.8, 171.7, 171.0, 170.92, 170.9, 170.3, 170.1, 156.0, 155.5, 155.1, 154.2, 135.8, 135.8, 135.5, 135.4, 129.3, 128.7, 128.64, 128.61, 128.5, 128.42, 128.4, 128.3, 128.3, 80.6, 80.5, 80.0, 79.9, 67.3, 67.0, 66.6, 64.7, 64.5, 62.0, 61.9, 54.1, 53.9, 52.7, 52.4, 38.7, 38.4, 38.2, 38.0, 31.2, 30.9, 29.74, 29.71, 29.3, 29.2, 28.8, 28.53, 28.50, 28.46, 28.4, 28.30, 27.8, 27.6, 27.4, 24.8, 24.6, 24.5, 24.3, 23.2, 23.19, 23.15, 23.0, 22.9, 22.7, 22.44, 22.36, 20.1, 20.0, 19.9, 19.8, 19.4, 19.1, 18.84, 18.80; IR (thin film) 2962.1, 1738.5, 1687.4, 1655.6, 1455.0  $\text{cm}^{-1}$ ; LRMS (ESI+)  $m/z$  calc'd for  $[\text{M}+\text{Na}]^+$  ( $\text{C}_{25}\text{H}_{40}\text{N}_2\text{O}_5\text{Na}$ ): 471.2,  $[\text{M}+\text{K}]^+$  ( $\text{C}_{25}\text{H}_{40}\text{N}_2\text{O}_5\text{K}$ ): 487.2, found: 471.3, 487.3.

(1) Zhu, J.; Wu, X.; Danishefsky, S. J. *Tetrahedron Lett.* **2009**, *50*, 577–579.

(2) Wu, X.; Stockdill, J. L.; Wang, P.; Danishefsky, S. J. *Am. Chem. Soc.* **2010**, *132*, 4098–4100.

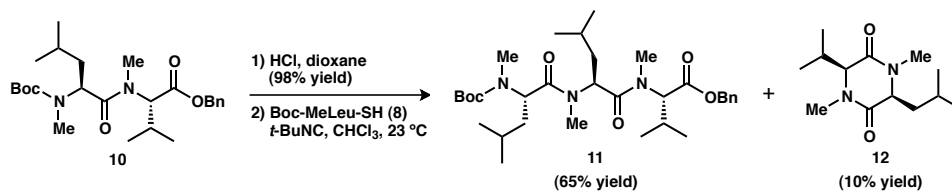

**MeLeu-MeLeu-MeVal-OBn (11).** Dipeptide **10** (45 mg, 0.10 mmol) was treated with 4.0 M HCl in dioxane (1.0 mL), and the resulting mixture was stirred for 10 min. The reaction mixture was co-evaporated with toluene to give the corresponding deprotected dipeptide as the amine hydrochloride salt (38 mg, 98% yield). This material was carried directly into the next step without further purification. To a solution of **8** (52 mg, 0.2 mmol) in CHCl<sub>3</sub> (1 mL) was added *t*-butyl isonitrile (34  $\mu$ L, 0.3 mmol), then the mixture was stirred for 5 min. Deprotected dipeptide (38 mg, 0.099 mmol) in CHCl<sub>3</sub> (2 mL) was added to the resulting mixture via syringe pump over 2 hours, then the reaction was stirred overnight at room temperature. The volatiles were removed at low pressure, and the residue was purified by flash chromatography using (4:1 hexanes/ethyl acetate) to give tripeptide **11** (37 mg, 65% yield) as an off-white oil.  $[\alpha]_D^{20} = -142.1^\circ$  ( $c = 1.0$ , CH<sub>2</sub>Cl<sub>2</sub>); <sup>1</sup>H NMR (600 MHz, CDCl<sub>3</sub>, mixture of rotamers):  $\delta$  7.31 (td,  $J = 8.3, 7.5, 3.3$  Hz, 5H), [5.55 – 5.48 (m), 5.46 (ddd,  $J = 12.2, 9.1, 5.9$  Hz, 1H), 5.28 (dd,  $J = 12.3, 3.5$  Hz), 5.19 (t,  $J = 11.9$  Hz), 5.09 – 5.05 (m), 5.03 (dd,  $J = 9.9, 4.8$  Hz), 4.98 (dd,  $J = 12.2, 1.9$  Hz), 4.89 (d,  $J = 6.4$  Hz), 4.87 (dd,  $J = 6.9, 2.8$  Hz), 4.84 (s), 4.78 (dd,  $J = 9.4, 4.8$  Hz), 4.34 (d,  $J = 10.1$  Hz), 4.27 (d,  $J = 10.1$  Hz) *all sum to 5H*], [3.00 (s), 2.96 (s), 2.92 (s), 2.89 (s), 2.81 (s), 2.76 (s), 2.73 (s), 2.72 (s), 2.69 (s), 2.67 (s) *all sum to 9H*], 2.21 (dddd,  $J = 17.6, 13.3, 11.3, 8.5$  Hz, 1H), 1.72 – 1.59 (m, 1H), 1.59 – 1.49 (m, 3H), 1.45 (s, 4H), 1.44 – 0.78 (comp. m, 18H); <sup>13</sup>C NMR (151 MHz, CDCl<sub>3</sub>)  $\delta$  172.6, 171.9, 171.8, 171.6, 171.3, 171.1, 170.9, 170.8, 170.7, 170.4, 169.9, 169.8, 155.9, 155.7, 155.1, 155.0, 135.74, 135.73, 135.39, 135.36, 128.8, 128.7, 128.7, 128.6, 128.5, 128.43, 128.42, 128.40, 128.3, 128.0, 80.58, 80.55, 80.1, 80.0, 67.0, 66.8, 66.64, 66.60, 64.7, 64.5, 61.88, 61.87, 61.82, 54.12, 52.9, 52.7, 51.6, 51.4, 51.1, 51.0, 38.7, 38.6, 38.3, 38.1, 38.0, 37.9, 37.8, 37.7, 31.3, 31.2, 30.3, 30.2, 29.88, 29.86, 29.81, 29.7, 29.6, 29.4, 29.1, 28.49, 28.47, 28.44, 28.41, 27.7, 27.7, 27.5, 27.34, 27.31, 25.0, 24.9, 24.8, 24.57, 24.56, 24.52, 24.50, 24.2, 23.49, 23.46, 23.3, 23.14, 23.11, 23.05, 22.9, 22.8, 22.6, 22.5, 22.4, 22.35, 22.3, 21.9, 20.02, 20.01, 19.76, 19.74, 18.82, 18.80, 18.77; IR (thin film) 2958.3, 2871.5, 2359.5, 2341.2, 1739.5, 1690.3, 1644.0 cm<sup>-1</sup>; LRMS (ESI+)  $m/z$  calc'd for [M+Na]<sup>+</sup> (C<sub>32</sub>H<sub>53</sub>N<sub>3</sub>O<sub>6</sub>Na): 598.2, found: 598.4.

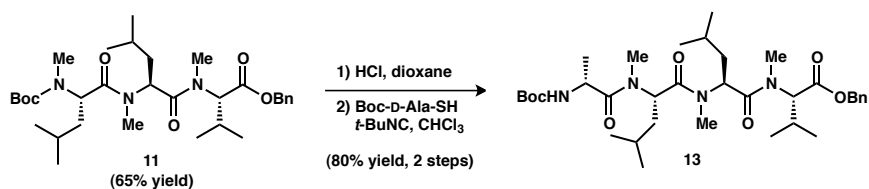

**Boc-D-Ala-MeLeu-MeLeu-MeVal-OBn (13).** Tripeptide **11** (29 mg, 0.05 mmol) was treated with 4.0 M HCl in dioxane (1.0 mL), and the resulting mixture was stirred for 10 min. The reaction mixture was co-evaporated with toluene to give the corresponding deprotected tripeptide as the amine hydrochloride salt. This material was subsequently dissolved in chloroform (1.0 mL), then Boc-D-Ala-SH<sup>3</sup> (21 mg, 0.1 mmol) and *t*-butyl isonitrile (23  $\mu$ L, 0.2 mmol) were added. The reaction was stirred at room temperature overnight. The volatiles were removed at low pressure, and the residue was purified by flash chromatography (6:1 hexanes/ethyl acetate) to give tetrapeptide **13** (26 mg, 80% yield over two steps).  $[\alpha]_D^{20} = -143.7^\circ$  ( $c = 3.0$ , CHCl<sub>3</sub>); <sup>1</sup>H NMR (600 MHz, CDCl<sub>3</sub>, mixture of rotamers):  $\delta$  7.36 – 7.27 (m, 5H), [5.51 – 5.40 (m), 5.33 – 5.21 (m), 5.12 (dd,  $J = 72.2, 12.3$  Hz), 4.98 (d,  $J = 12.2$  Hz), 4.87 (d,  $J = 10.5$  Hz), 4.56 (app. q,  $J = 7.4$  Hz), 4.25 (d,  $J = 10.1$  Hz), *all sum to 6H*], [2.95 (s), 2.93 (s), 2.91 (s), 2.90 (s), 2.68 (s), 2.67 (s), *all sum to 9H*], 2.21 (tdt,  $J = 13.2, 10.4, 6.6$  Hz, 1H), [1.69 (dtd,  $J = 14.6, 10.3, 5.7$  Hz), 1.64 – 1.58 (m), 1.57 – 1.46 (m), 1.40 (m), *all sum to 6H*] 1.40 (s, 9H), 1.26 (d,  $J = 6.9$  Hz, 3H), [0.99 (d,  $J = 6.5$  Hz), 0.97 (d,  $J = 6.3$  Hz), 0.91 – 0.86 (m), 0.85 (d,  $J = 6.7$  Hz), 0.77 (d,  $J = 6.7$  Hz), *all sum to 18H*]; <sup>13</sup>C NMR (151 MHz, CDCl<sub>3</sub>, mixture of rotamers):  $\delta$  173.3, 173.2, 172.0, 171.0, 170.9, 170.7, 169.9, 169.8, 155.5, 155.4, 135.7, 135.3, 128.8, 128.7, 128.66, 128.6, 128.5, 128.44, 128.41, 128.35, 128.3, 79.8, 79.7, 67.0, 66.6, 64.6, 61.9, 51.7, 51.7, 51.6, 51.2, 46.7, 38.7, 38.1, 37.92, 37.90, 31.2, 30.5, 30.2, 30.0, 29.98, 29.8, 28.44, 28.41, 27.7, 27.3, 24.9, 24.86, 24.6, 24.5, 23.6, 23.11, 23.09, 23.0, 22.95, 22.7, 22.5, 22.3, 22.2, 20.0, 19.7, 18.80, 18.76, 18.4, 18.2; IR (thin film) 2959.2, 1737.6, 1642.1, 1456.9, 1367.3 cm<sup>-1</sup>; LRMS (ESI+)  $m/z$  calc'd for [M+H]<sup>+</sup> (C<sub>35</sub>H<sub>59</sub>N<sub>4</sub>O<sub>7</sub>): 647.4, found: 647.4.

(3) Synthesized by the procedure outlined in: Lehmann, J.; Linden, A.; Heimgartner, H. *Helv. Chim. Acta* **1999**, 82, 888–908. Characterization data for Boc-L-Ala-SH are given in: Monfardini, I.; Huang, J.-W.; Beck, B.; Cellitti, J. F.; Pellicchia, M.; Dömling, A. *J. Med. Chem.* **2011**, 54, 890–900.

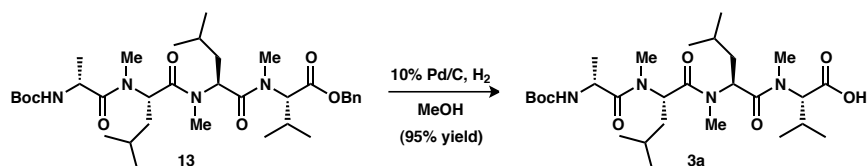

**Boc-D-Ala-MeLeu-MeLeu-MeVal-OH (3a)**. A suspension containing tetrapeptide **13** (64.5 mg, 0.1 mmol) and palladium on activated charcoal (10% Pd basis, 20 mg) in MeOH (10 mL) was placed under an atmosphere of hydrogen. The suspension was stirred overnight at room temperature. The reaction mixture was then filtered to remove the catalyst, and evaporated at low pressure. The resulting residue was dried under high vacuum to give acid **3a** as a white solid (52.8 mg, 95% yield). Selected characterization data: <sup>1</sup>H NMR consistent with Wenger's data; <sup>13</sup>C NMR (151 MHz, CDCl<sub>3</sub>) δ 174.7, 173.7, 173.2, 172.7, 172.3, 170.9, 170.8, 169.9, 167.9, 155.9, 155.5, 132.6, 131.0, 128.9, 79.9, 79.8, 68.3, 65.0, 64.6, 52.8, 52.4, 51.6, 51.5, 46.8, 46.4, 38.9, 38.63, 38.58, 38.2, 37.8, 30.7, 30.50, 30.49, 30.3, 30.2, 29.2, 29.1, 28.5, 28.4, 27.2, 27.0, 25.0, 24.8, 24.7, 23.9, 23.3, 23.2, 23.12, 23.07, 23.02, 23.00, 22.6, 22.5, 22.2, 20.3, 19.7, 19.1, 18.5, 18.3, 17.3, 14.2, 11.1; LRMS (ESI+) *m/z* calc'd for [M+H]<sup>+</sup> (C<sub>28</sub>H<sub>53</sub>N<sub>4</sub>O<sub>7</sub>): 557.4, found: 557.3.

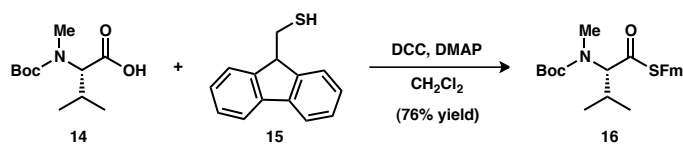

**Boc-MeVal-SFm (16)**. To a solution of Boc-MeVal-OH (**14**) (136 mg, 0.59 mmol) in CH<sub>2</sub>Cl<sub>2</sub> (2 mL) was added (9*H*-fluoren-9-yl)methanethiol<sup>4</sup> (**15**) (150 mg, 0.71 mmol), DCC (134 mg, 0.65 mmol), and DMAP (7.0 mg, 0.057 mmol). The resulting mixture was stirred overnight, and passed through a filter to remove the precipitate. The filtrate was evaporated at low pressure. The crude residue was purified by flash chromatography (20:1 hexanes/ethyl acetate) to give thioester **16** (190 mg, 76% yield). [α]<sub>D</sub><sup>20</sup> = -128.4° (c = 1.0, CHCl<sub>3</sub>); <sup>1</sup>H NMR (600 MHz, CDCl<sub>3</sub>) δ 7.72 (dt, *J* = 7.1, 3.3 Hz, 2H), 7.66 – 7.60 (m, 2H), 7.37 (td, *J* = 7.6, 2.4 Hz, 2H), 7.29 (qd, *J* = 7.3, 3.8 Hz, 2H), 4.28 (dd, *J* = 222.4, 10.4 Hz, 1H), 4.15 (dt, *J* = 11.5, 5.9 Hz, 1H), 3.59 – 3.46 (m, 2H), 2.63 (d, *J* = 57.6 Hz, 3H), 2.18 (dtt, *J* = 13.4, 9.9, 6.5 Hz, 1H), 1.44 (d, *J* = 21.9 Hz, 9H), 0.85 (app. dd, *J* = 21.9, 6.7 Hz, 6H); <sup>13</sup>C NMR (151 MHz, CDCl<sub>3</sub>, mixture of rotamers) δ 197.8, 197.3, 156.1, 155.2, 145.5, 145.4, 145.32, 145.27, 141.3, 141.27, 141.2, 127.8,

(4) D. Crich, K. Sana, S. Guo, *Org. Lett.* **2007**, *9*, 4423–4426.

127.73, 127.7, 127.1, 127.05, 124.9, 124.8, 124.73, 124.68, 120.0, 119.9, 80.6, 80.3, 71.2, 69.4, 46.93, 46.88, 31.81, 31.75, 30.1, 30.0, 28.48, 28.44, 28.42, 27.3, 26.8, 19.9, 19.7, 19.1, 18.7; IR (thin film) 2970.8, 2931.3, 1690.3, 1450.2, 1156.1, 1128.2  $\text{cm}^{-1}$ ; LRMS (ESI+)  $m/z$  calc'd for  $[\text{M}+\text{Na}]^+$  ( $\text{C}_{25}\text{H}_{31}\text{NO}_3\text{SNa}$ ): 448.2, found: 448.2.

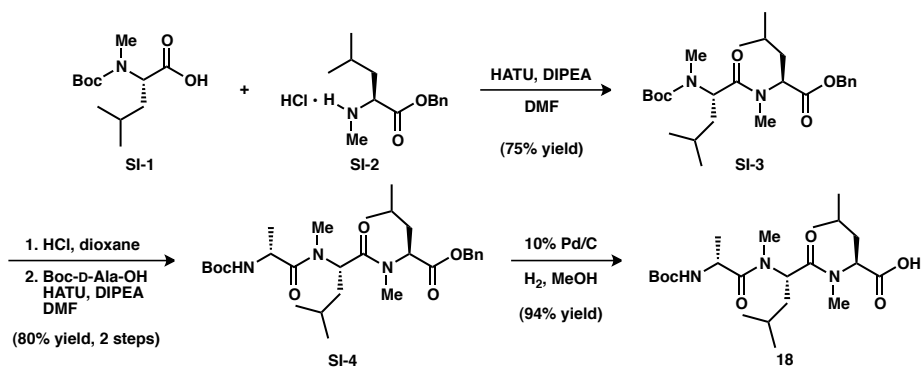

**Boc-D-Ala-MeLeu-MeLeu-OH (18)**.<sup>5</sup> To a solution of Boc-MeLeu-OH (**SI-1**) (203 mg, 0.83 mmol) and H-MeLeu-OBn hydrochloride<sup>6</sup> (204 mg, 0.75 mmol) in DMF (4.0 mL) was added HATU (315 mg, 0.83 mmol) and DIPEA (0.4 mL, 2.25 mmol) at room temperature. The resulting mixture was stirred for 30 min. The reaction mixture was diluted with ethyl acetate, and then washed with water and brine. The organic phase was dried over  $\text{MgSO}_4$  and evaporated at low pressure. The crude residue was purified by flash chromatography (6:1 hexanes/ethyl acetate) to afford dipeptide **SI-3** (260 mg, 75% yield).

Dipeptide **SI-3** (346.5 mg, 0.75 mmol) was dissolved in a solution of HCl in dioxane (4 M, 4 mL) and stirred at room temperature for 10 min. Co-evaporation of the resulting mixture with toluene afforded the corresponding amine HCl salt, which was carried directly into the next step without further purification.

To a solution of Boc-D-Ala-OH (157 mg, 0.83 mmol) and H-MeLeu-MeLeu-OBn hydrochloride (300 mg, 0.75 mmol) in DMF (4.0 mL) was added HATU (315 mg, 0.83 mmol) and DIPEA (0.4 mL, 2.25 mmol) at room temperature. The resulting mixture was stirred for 30 min. The reaction mixture was diluted with ethyl acetate, and then washed with water and brine. The organic phase was dried over  $\text{MgSO}_4$  and evaporated at low pressure. The crude residue was purified by flash chromatography (6:1 hexanes/ethyl acetate) to afford tripeptide **SI-4** (320 mg, 80% yield over two steps).

(5) This compound is known, but was synthesized by a method different from what was previously reported. The procedure we used is presented in brief, without characterization of intermediates. Full characterization data for **18** are found in: Wenger, R. M. *Helv. Chim. Acta* **1983**, *66*, 2672–2702.

(6) Bossler, H. G.; Seebach, D. *Helv. Chim. Acta* **1994**, *77*, 1124–1165.

A suspension containing tripeptide **SI-3** (320 mg, 0.6 mmol) and 10% palladium on activated charcoal (60 mg) in MeOH (30 mL) was placed under an atmosphere of hydrogen. The suspension was stirred overnight at room temperature. The reaction mixture was then filtered to remove the catalyst, and evaporated at low pressure. The resulting residue was dried under high vacuum to give acid **18** as a white solid (250 mg, 94% yield). <sup>1</sup>H NMR (600 MHz, CDCl<sub>3</sub>, mixture of 2 rotamers) δ 5.55 – 5.47 (m, 1.5H), 5.42 (d, *J* = 8.1 Hz, 0.5H), 5.13 (t, *J* = 8.0 Hz, 0.5H), 4.68 (dd, *J* = 10.3, 4.3 Hz, 0.5H), 4.58 (tt, *J* = 15.8, 7.4 Hz, 1H), [2.96 (s), 2.92 (s), 2.84 (s), 2.83 (s), *sum to* 6H], 1.84 – 1.64 (m, 3H), [1.59 (ddd, *J* = 20.1, 10.0, 5.6 Hz), 1.50 (ddd, *J* = 13.3, 6.5, 2.4 Hz), 1.41 – 1.34 (m, 1H), *sum to* 2H], [1.43 (s, 4H), 1.41 (s, 5H), *sum to* 9H], 1.28 (dd, *J* = 7.0, 5.4 Hz, 3H), [1.00 (d, *J* = 6.5 Hz), 0.97 (d, *J* = 6.8 Hz), 0.95 (d, *J* = 6.7 Hz), 0.93 (app. t, *J* = 6.8 Hz), 0.91 (d, *J* = 6.6 Hz), 0.90 (d, *J* = 6.6 Hz), *all sum to* 12H]; <sup>13</sup>C NMR (126 MHz, CDCl<sub>3</sub>) δ 175.6, 173.6, 172.9, 171.7, 170.7, 156.4, 155.6, 105.1, 80.9, 79.8, 77.4, 57.4, 55.5, 51.8, 51.5, 46.8, 38.3, 37.8, 37.7, 37.2, 31.9, 30.3, 30.1, 29.9, 28.5, 28.4, 24.9, 24.8, 24.8, 24.7, 23.5, 23.4, 23.2, 23.1, 22.6, 22.4, 21.5, 21.3, 18.7, 18.2; LRMS (ESI+) *m/z* calc'd for [M+Na]<sup>+</sup> (C<sub>22</sub>H<sub>41</sub>N<sub>3</sub>O<sub>6</sub>Na): 466.3, found 466.3.

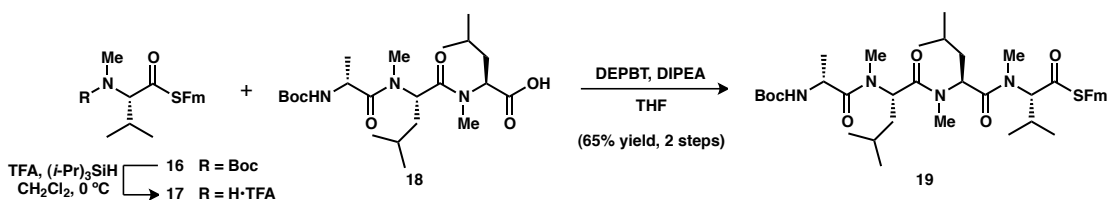

**Boc-D-Ala-MeLeu-MeLeu-MeVal-SFm (19).** To a cooled (0 °C) solution of Boc-MeVal-SFm (**16**) (60 mg, 0.14 mmol) in CH<sub>2</sub>Cl<sub>2</sub> (1.0 mL) was added TFA (250 μL) and triisopropylsilane (20 μL). The reaction was stirred at 0 °C for 30 min. The resulting mixture was concentrated by rotary evaporation while being kept cold in a water bath containing ice. The crude amine TFA salt **17** was obtained in essentially quantitative yield, and carried directly into the next step without further purification.

To a solution of amine salt **17** (48 mg, 0.1 mmol) and tripeptide **18** (44 mg, 0.1 mmol) in THF (2.0 mL) was added DEPBT (45 mg, 0.15 mmol) and DIPEA (43 μL, 0.25 mmol) at room temperature. The reaction was stirred overnight at room temperature. Analysis of the reaction mixture by UPLC-MS showed the formation of two major products (~3:1), both possessing the desired mass (**Figure S-1**).<sup>7</sup> The solvent was evaporated at low pressure. The residue was purified by flash chromatography (6:1 hexanes/ethyl acetate) to give tetrapeptide thioester **19** (49 mg,

(7) The structure of the major isomer (retention time = 3.16 min) was assigned as **19** based on comparison to a sample of **19** that was independently synthesized by sequential HATU couplings (*vide infra*).

65% yield over two steps).  $[\alpha]_D^{20} = -170.5^\circ$  ( $c = 1.0$ ,  $\text{CHCl}_3$ );  $^1\text{H NMR}$  (600 MHz,  $\text{CDCl}_3$ , 4:1 ratio of rotamers, \* = both rotamers, + = major rotamer, ^ = minor rotamer)  $\delta$  7.71\* (d,  $J = 7.6$  Hz, 2H), 7.58\* (dd,  $J = 10.2$ , 7.6 Hz, 2H), 7.38 – 7.34\* (m, 2H), 7.30 – 7.25\* (m, 2H), 5.47\* (dd,  $J = 8.4$ , 6.5 Hz, 1H), [5.39^ (dd,  $J = 9.9$ , 4.7 Hz), 5.35+ (dd,  $J = 9.6$ , 4.9 Hz), 1H], [5.30+ (d,  $J = 8.2$  Hz), 5.27^ (d,  $J = 8.2$  Hz), 1H], [4.86+ (d,  $J = 10.6$  Hz), 4.30^ (d,  $J = 9.7$  Hz), 1H], 4.58\* (dt,  $J = 16.8$ , 8.6 Hz, 1H), 4.17\* (t,  $J = 5.3$  Hz, 1H), [3.83^ (dd,  $J = 13.7$ , 4.7 Hz), 3.70+ (dd,  $J = 13.7$ , 5.3 Hz), 1H], [3.52+ (dd,  $J = 13.7$ , 5.3 Hz), 3.32^ (dd,  $J = 13.7$ , 5.9 Hz), 1H], [3.08 – 3.00 (m), 2.96 (s), 2.93 (s), 2.89 (s), 2.87 – 2.80 (m), 2.60 (s), 2.59 (s), 2.58 (s), 2.28 (s), *all sum to 9H*], [2.23 – 2.18^ (m), 2.15+ (dp,  $J = 10.6$ , 6.6 Hz), 1H], [1.71 – 1.66 (m), 1.66 – 1.58 (m), 1.56 (t,  $J = 9.2$  Hz), 1.52 – 1.45 (m), 1.44^ (s, 2H), 1.42+ (s, 7H), 1.40 – 1.29 (m), *all sum to 15H*], 1.28 (d,  $J = 6.8$  Hz, 3H), [0.96^ (d,  $J = 6.4$  Hz), 0.91 – 0.87\* (m), 0.85+ (d,  $J = 6.4$  Hz), 0.81^ (d,  $J = 6.9$  Hz), 0.68+ (d,  $J = 6.7$  Hz) *all sum to 18H*];  $^{13}\text{C NMR}$  (151 MHz,  $\text{CDCl}_3$ , mixture of rotamers)  $\delta$  197.6, 197.1, 196.2, 173.7, 172.1, 171.4, 171.0, 170.7, 169.9, 155.6, 155.55, 145.3, 145.1, 145.0, 144.6, 141.7, 141.6, 141.43, 141.39, 130.3, 130.2, 128.0, 128.0, 127.87, 127.85, 127.82, 127.76, 127.7, 127.3, 127.2, 127.14, 127.08, 125.5, 125.2, 125.1, 125.99, 124.95, 124.6, 124.4, 120.3, 120.2, 120.1, 120.09, 120.03, 120.02, 119.9, 91.5, 80.04, 79.96, 70.6, 67.5, 60.6, 51.84, 51.81, 51.4, 51.1, 46.9, 46.82, 46.79, 38.9, 38.1, 38.0, 37.6, 37.5, 32.2, 31.5, 31.3, 30.6, 30.3, 30.1, 30.0, 29.6, 28.5, 28.4, 27.5, 26.6, 26.5, 24.94, 24.85, 24.5, 24.4, 23.7, 23.23, 23.15, 23.0, 22.7, 22.5, 22.4, 22.1, 21.2, 19.81, 19.76, 19.72, 18.8, 18.5, 18.3, 18.1, 14.3; IR (thin film) 2960.2, 2871.5, 2360.4, 1692.2, 1639.2, 1169.6  $\text{cm}^{-1}$ ; LRMS (ESI+)  $m/z$  calc'd for  $[\text{M}+\text{Na}]^+$  ( $\text{C}_{42}\text{H}_{62}\text{N}_4\text{O}_6\text{SNa}$ ): 773.4, found: 773.6.

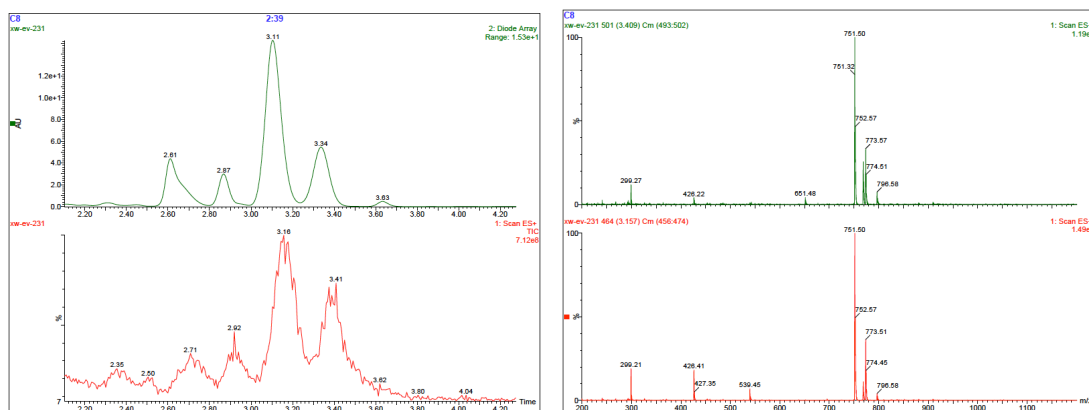

**Figure S-1.** (Left) UV and MS traces from UPLC-MS analysis of the crude reaction mixture containing tetrapeptide thioester **19**; major isomer retention time = 3.11 min, minor isomer retention time = 3.34 min, gradient 80–90%  $\text{CH}_3\text{CN}/\text{H}_2\text{O}$  with 0.05% TFA over 6 min at a flow rate of 0.3 mL/min, C18 column. (Right) ESI-MS of peak with retention time = 3.16 min (lower spectrum) and ESI-MS of peak with retention time = 3.41 min (upper spectrum); LRMS (ESI+)  $m/z$  calc'd for  $[\text{M}+\text{H}]^+$  ( $\text{C}_{42}\text{H}_{62}\text{N}_4\text{O}_6\text{S}$ ): 751.44, found: 751.50.



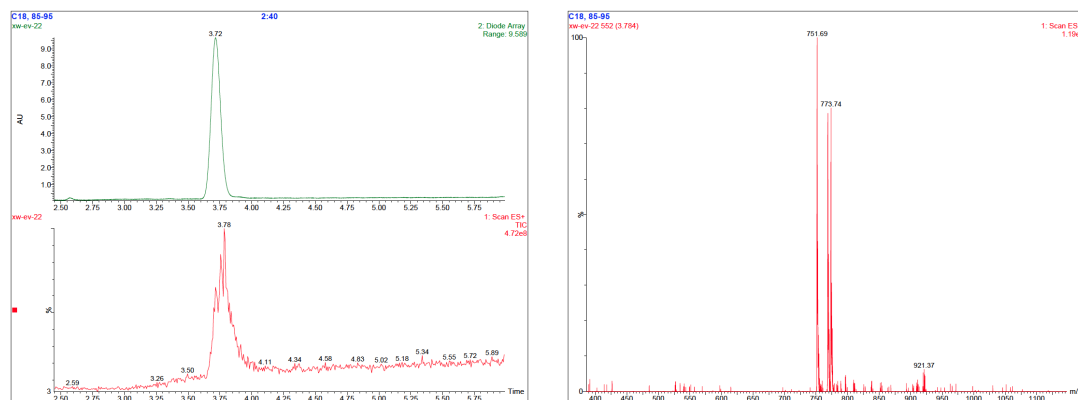

**Figure S-2.** (Left) UV and MS traces from UPLC-MS analysis of purified tetrapeptide thioester **19**; retention time = 3.72 min, gradient 85–95% CH<sub>3</sub>CN/H<sub>2</sub>O with 0.05% TFA over 6 min at a flow rate of 0.3 mL/min, C18 column. (Right) ESI-MS of compound **19**; LRMS (ESI+)  $m/z$  calc'd for [M+H]<sup>+</sup> (C<sub>42</sub>H<sub>62</sub>N<sub>4</sub>O<sub>6</sub>S): 751.44, found: 751.69.

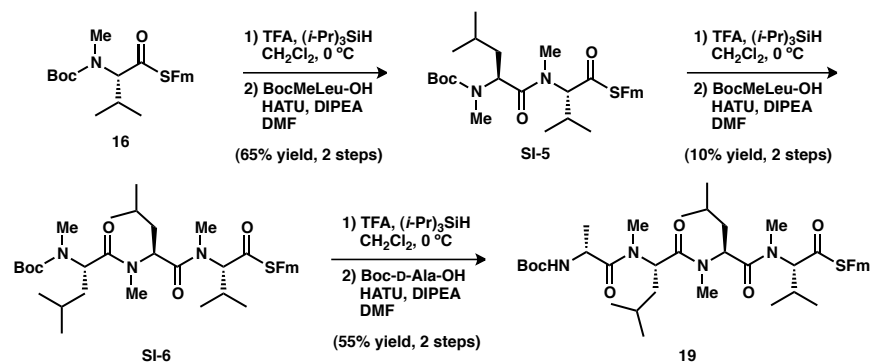

**Boc-D-Ala-MeLeu-MeLeu-MeVal-SFm (19). Alternate route (C→N):**<sup>8</sup> To a cooled (0 °C) solution of Boc-MeVal-SFm (**16**) (60 mg, 0.14 mmol) in CH<sub>2</sub>Cl<sub>2</sub> (1.0 mL) was added TFA (0.25 mL) and triisopropylsilane (20 μL). The reaction was stirred at 0 °C for 30 min. The resulting mixture was concentrated by rotary evaporation while being kept cold in a water bath containing ice. The crude amine TFA salt was obtained in essentially quantitative yield, and carried directly into the next step without further purification.

To a solution of Boc-MeLeu-OH (42 mg, 0.17 mmol) and TFA·H-MeVal-SFm (75 mg, 0.14 mmol) in DMF (1.0 mL) was added HATU (65 mg, 0.17 mmol) and DIPEA (54 μL, 0.31 mmol) at room temperature. The resulting mixture was stirred for 30 min. The reaction mixture was diluted with ethyl acetate, and then washed with water and brine. The organic phase was dried over MgSO<sub>4</sub> and evaporated at low pressure. The crude residue was purified by flash chromatography (8:1 hexanes/ethyl acetate) to afford dipeptide thioester **SI-5** (50 mg, 65% yield over two steps).

To a cooled (0 °C) solution of dipeptide thioester **SI-5** (50 mg, 0.091 mmol) in CH<sub>2</sub>Cl<sub>2</sub> (0.8 mL) was added TFA (0.20 mL) and triisopropylsilane (15 μL). The reaction was stirred at 0 °C for 30 min. The resulting mixture was concentrated by rotary evaporation while being kept cold in a water bath containing ice. The crude amine TFA salt was obtained in essentially quantitative yield, and carried directly into the next step without further purification.

To a solution of Boc-MeLeu-OH (11 mg, 0.044 mmol) and TFA·H-MeLeu-MeVal-SFm (16.4 mg, 0.029 mmol) in DMF (0.5 mL) was added HATU (17 mg, 0.044 mmol) and DIPEA (11 μL, 0.064 mmol) at room temperature. The resulting mixture was stirred for 30 min. The reaction mixture was diluted with ethyl acetate, and then washed with water and brine. The organic phase was dried over MgSO<sub>4</sub> and evaporated at low pressure. The crude residue

(8) As noted in the manuscript, synthesis of **19** by sequential C→N extension proved to be less efficient than the route that involved coupling the thioester-bearing residue **17** to the C-terminus of tripeptide **18** (*vide supra*). The stepwise route is presented here in brief, however, because it enabled us to assign the major product of the coupling between **17** and **18** as the desired DLLL-tetrapeptide **19** (as opposed to the DLDL-tetrapeptide).

was purified by flash chromatography (8:1 hexanes/ethyl acetate) to afford tripeptide thioester **SI-6** (2 mg, 10% yield over two steps).

To a cooled (0 °C) solution of tripeptide thioester **SI-6** (2.7 mg, 0.004 mmol) in CH<sub>2</sub>Cl<sub>2</sub> (0.4 mL) was added TFA (0.10 mL) and triisopropylsilane (5 μL). The reaction was stirred at 0 °C for 30 min. The resulting mixture was concentrated by rotary evaporation while being kept cold in a water bath containing ice. The crude amine TFA salt was obtained in essentially quantitative yield, and carried directly into the next step without further purification.

To a solution of Boc-D-Ala-OH (1.5 mg, 8 μmol) and TFA·H-MeLeu-MeLeu-MeVal-SFm (2.8 mg, 4 μmol) in DMF (0.2 mL) was added HATU (3 mg, 8 μmol) and DIPEA (2 μL, 12 μmol) at room temperature. The resulting mixture was stirred for 30 min. Analysis of the reaction mixture by UPLC-MS showed the formation of a product possessing the desired mass (**Figure S-3**). The reaction mixture was diluted with ethyl acetate, and then washed with water and brine. The organic phase was dried over MgSO<sub>4</sub> and evaporated at low pressure. The crude residue was purified by flash chromatography (5:1 hexanes/ethyl acetate) to afford tetrapeptide thioester **19** (1.6 mg, 55% yield over two steps).

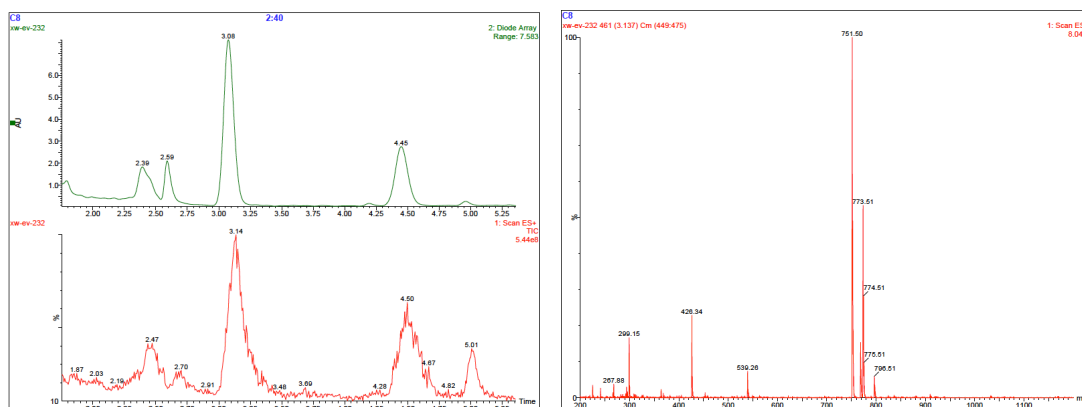

**Figure S-3.** (Left) UV and MS traces from UPLC-MS analysis of the crude reaction mixture containing tetrapeptide thioester **19**; retention time = 3.08 min, gradient 80–90% CH<sub>3</sub>CN/H<sub>2</sub>O with 0.05% TFA over 6 min at a flow rate of 0.3 mL/min, C18 column. (Right) ESI-MS of peak with retention time = 3.14 min; LRMS (ESI+) *m/z* calc'd for [M+H]<sup>+</sup> (C<sub>42</sub>H<sub>62</sub>N<sub>4</sub>O<sub>6</sub>S): 751.44, found: 751.50.

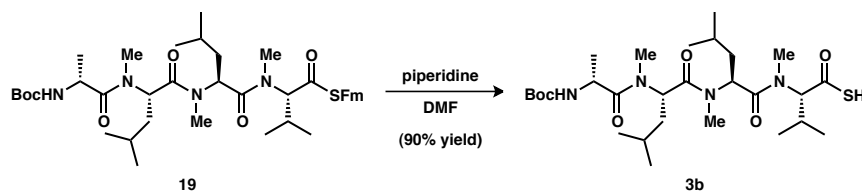

**Boc-D-Ala-MeLeu-MeLeu-MeVal-SH (3b).** To a solution of tetrapeptide thioester **19** (6 mg, 8  $\mu\text{mol}$ ) in DMF (0.2 mL) was added piperidine (0.02 mL). The reaction was stirred at room temperature for 15 min. Analysis of the reaction mixture by UPLC-MS indicated complete consumption of the starting material (**Figure S-4**). The reaction mixture was neutralized with acetic acid (0.02 mL). The product was purified by reversed-phase HPLC (C18 column, gradient 60–80%  $\text{CH}_3\text{CN}/\text{H}_2\text{O}$  with 0.05% TFA over 30 min) to afford the corresponding tetrapeptide thioacid **3b** (4.1 mg, 90% yield), which was used in the next step without further purification.

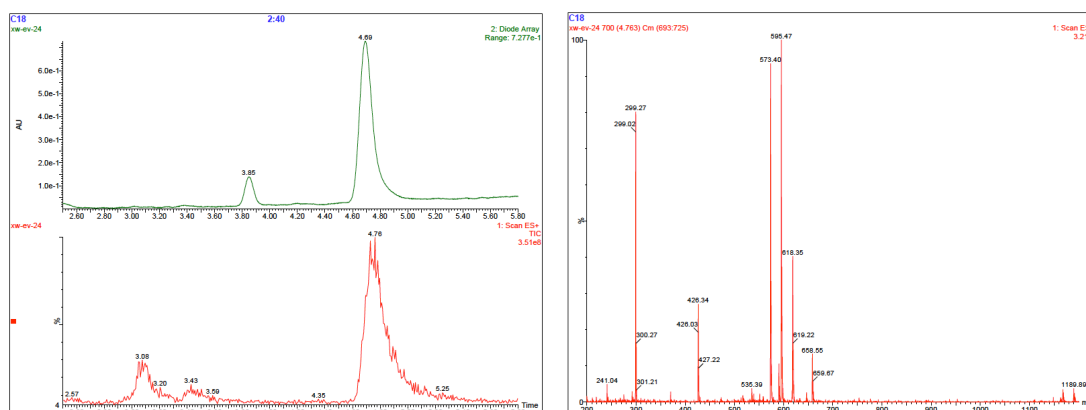

**Figure S-4.** (Left) UV and MS traces from UPLC-MS analysis of the crude reaction mixture containing tetrapeptide thioacid **3b**; retention time = 4.69 min, gradient 60–80%  $\text{CH}_3\text{CN}/\text{H}_2\text{O}$  with 0.05% TFA over 6 min at a flow rate of 0.3 mL/min, C18 column. (Right) ESI-MS of compound **3b**; LRMS (ESI+)  $m/z$  calc'd for  $[\text{M}+\text{H}]^+$  ( $\text{C}_{28}\text{H}_{52}\text{N}_4\text{O}_6\text{S}$ ): 573.36, found: 573.40.

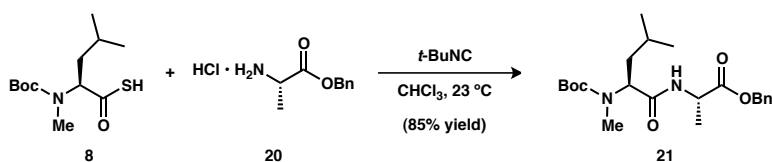

**Boc-MeLeu-Ala-OBn (21).** To a solution of Boc-MeLeu-SH (**8**) (130 mg, 0.5 mmol) was added H-Ala-OBn hydrochloride (**20**) (108 mg, 0.5 mmol) and *t*-butyl isonitrile (0.17 mL, 1.5 mmol). The resulting mixture was stirred overnight at room temperature. The volatiles were removed at low pressure, and the residue was purified by flash chromatography (5:1 hexanes/ethyl acetate) to give dipeptide **21** (172 mg, 85% yield).  $[\alpha]_D^{20} = -67.2^\circ$  ( $c = 1.0$ ,  $\text{CHCl}_3$ );  $^1\text{H NMR}$  (600 MHz,  $\text{CDCl}_3$ , mixture of rotamers)  $\delta$  7.32 (q,  $J = 7.2$  Hz, 5H), [6.70 (s), 6.43 (s), 1H], 5.14

(app. q,  $J = 12.3$  Hz, 2H), [4.66 (s), 4.57 (br. d,  $J = 25.3$  Hz), 2H], 2.73 (s, 1H), [1.66 (app. s), 1.62 (app. s), 1H], 1.45 (app. s, 10H), 1.37 (app. s, 3H), 0.91 (d,  $J = 7.0$  Hz, 3H), 0.89 (d,  $J = 6.6$  Hz, 3H);  $^{13}\text{C}$  NMR (151 MHz,  $\text{CDCl}_3$ );  $\delta$  172.5, 171.1, 170.8, 156.8, 155.5, 135.4, 128.6, 128.5, 128.4, 128.3, 128.2, 81.0, 80.4, 67.1, 57.6, 56.2, 48.1, 36.5, 30.0, 29.8, 28.4, 24.8, 24.7, 24.6, 23.3, 23.2, 23.15, 21.9, 21.5, 18.6; IR (thin film) 3321.8, 2959.2, 2872.5, 1745.3, 1688.4, 1663.3, 1367.3  $\text{cm}^{-1}$ ; LRMS (ESI+)  $m/z$  calc'd for  $[\text{M}+\text{Na}]^+$  ( $\text{C}_{22}\text{H}_{34}\text{N}_2\text{O}_5\text{Na}$ ): 429.3, found: 429.3.

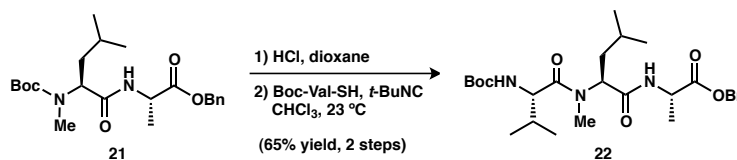

**Boc-Val-MeLeu-Ala-OBn (22)**. Dipeptide **21** (101.5 mg, 0.25 mmol) was treated with 4 M HCl in dioxane (1.2 mL), and the resulting mixture was stirred for 10 min. The reaction mixture was co-evaporated with toluene to give the corresponding deprotected dipeptide as the amine hydrochloride salt in essentially quantitative yield. This material was carried directly into the next step without further purification.

To a solution of Boc-Val-SH<sup>9</sup> (116 mg, 0.5 mmol) in  $\text{CHCl}_3$  (3 mL) was added H-MeLeu-Ala-OBn hydrochloride (86 mg, 0.25 mmol) and *t*-butyl isonitrile (113  $\mu\text{L}$ , 1.0 mmol). The resulting mixture was stirred overnight at room temperature. The volatiles were removed at low pressure, and the residue was purified by flash chromatography (4:1 hexanes/ethyl acetate) to give tripeptide **22** (82 mg, 65% yield over two steps).  $[\alpha]_D^{20} = -88.5^\circ$  ( $c = 1.0$ ,  $\text{CHCl}_3$ );  $^1\text{H}$  NMR (600 MHz,  $\text{CDCl}_3$ , 4:1 ratio of rotamers, \* = both rotamers, + = major rotamer, ^ = minor rotamer)  $\delta$  7.89^ (d,  $J = 7.2$  Hz), 7.38 – 7.28\* (m, 5H), 6.54^ (d,  $J = 7.4$  Hz, 1H), [5.24 – 5.11\*<sup>+/+</sup> (m, 3.8H) (includes 3H and major rotamer corresponding to dd at 4.68)], 4.68^ (dd,  $J = 10.2$ , 4.0 Hz, 0.2H), 4.57 – 4.50\* (m, 1H), [4.40^ (dd,  $J = 9.4$ , 6.7 Hz), 4.25^ (t,  $J = 8.3$  Hz), 1H], [2.99^ (s), 2.79^ (s), 3H], [2.29^ (ddd,  $J = 13.3$ , 10.2, 5.0 Hz), 1.95\* (dq,  $J = 13.5$ , 6.6 Hz, 1H), 1.65^ (dd,  $J = 8.4$ , 6.3 Hz), 1.56^ (dt,  $J = 20.1$ , 5.9 Hz), 1.45\* (m), 1.41^ (s), 1.38^ (app. s), 1.37^ (app. s), 1.34^ (d,  $J = 7.1$  Hz) *all sum to 16H*], [1.06^ (d,  $J = 6.9$  Hz), 1.01^ (d,  $J = 6.7$  Hz), 0.99^ (d,  $J = 6.9$  Hz), 0.94^ (d,  $J = 6.8$  Hz), 0.92^ (d,  $J = 6.5$  Hz), 0.92^ (d,  $J = 6.8$  Hz), 0.90^ (d,  $J = 6.6$  Hz), 0.85^ (d,  $J = 6.5$  Hz), *all sum to 12H*];  $^{13}\text{C}$  NMR (151 MHz,  $\text{CDCl}_3$ , mixture of rotamers)  $\delta$  173.7, 172.6, 172.42, 172.35, 170.2, 168.7, 156.8,

(9) Le, H.-T. Gallard, J.-F. Mayer, M. Guittet, E.; Michelot, R. *Bioorg. Med. Chem.* **1996**, *4*, 2201–2209.

156.0, 135.8, 135.4, 128.7, 128.6, 128.5, 128.31, 128.29, 128.26, 128.2, 80.5, 79.7, 58.3, 55.6, 55.49, 54.46, 48.6, 48.2, 38.5, 36.2, 31.2, 31.1, 30.8, 29.0, 28.42, 28.40, 25.2, 24.7, 23.6, 23.2, 22.3, 22.1, 20.2, 19.6, 18.8, 18.3, 17.7, 17.6; IR (thin film) 3319.9, 2962.1, 2872.5, 1742.4, 1681.6, 1629.6, 1169.6  $\text{cm}^{-1}$ ; LRMS (ESI+)  $m/z$  calc'd for  $[\text{M}+\text{Na}]^+$  ( $\text{C}_{27}\text{H}_{43}\text{N}_3\text{O}_6\text{Na}$ ): 528.3, found: 528.3.

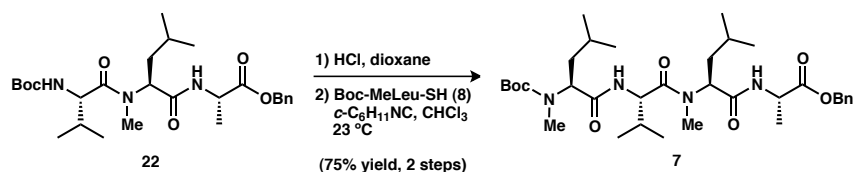

**Boc-MeLeu-Val-MeLeu-Ala-OBn (7).** Tripeptide **22** (50.5 mg, 0.1 mmol) was treated with 4 M HCl in dioxane (0.6 mL), and the resulting mixture was stirred for 10 min. The reaction mixture was co-evaporated with toluene to give the corresponding deprotected tripeptide as the amine hydrochloride salt. This material was carried directly into the next step without further purification.

To a solution of Boc-MeLeu-SH (**8**) (40 mg, 0.15 mmol) in  $\text{CHCl}_3$  (1.5 mL) was added H-Val-MeLeu-Ala-OBn hydrochloride (44 mg, 0.1 mmol) and cyclohexyl isonitrile (0.037 mL, 0.30 mmol). The resulting mixture was stirred overnight at room temperature. The volatiles were removed at low pressure, and the residue was purified by flash chromatography (4:1 hexanes/ethyl acetate) to give tetrapeptide **7** (48 mg, 75% yield over two steps).  $[\alpha]_D^{20} = -128.5^\circ$  ( $c = 1.0$ ,  $\text{CHCl}_3$ );  $^1\text{H NMR}$  (600 MHz,  $\text{CDCl}_3$ , mixture of rotamers) $^{10}$   $\delta$  7.38 – 7.31 (m, 5H), [6.69 (app. s), 6.54 (app. s), 6.45 (app. s), 2H], [5.24 – 5.09 (m), 4.75 (br. m), 4.66 (app. s), 4.55 (p,  $J = 7.2$  Hz), 4.48 (p,  $J = 7.2$  Hz), all sum to 6H], [3.00 (s), 2.82 (s), 2.77 (s), 2.74 (s), all sum to 6H], [2.10 – 2.04 (m), 2.01 (dq,  $J = 13.2$ , 6.6, 6.2 Hz), 1.71 – 1.61 (m), 1.49 (br. s, 9H), 1.46 – 1.39 (m), 1.39 (s), 1.38 (d,  $J = 7.2$  Hz), 1.35 (d,  $J = 7.2$  Hz, 3H), 1.34 (s), 1.25 (s), all sum to 19H], [0.97 (br. d,  $J = 6.9$  Hz, 1H), 0.94 (d,  $J = 6.2$  Hz, 2H), 0.93 (d,  $J = 6.5$  Hz, 8H), 0.91 (d,  $J = 6.3$  Hz, 5H), 0.90 (d,  $J = 6.5$  Hz, 11H), 0.88 (d,  $J = 6.8$  Hz, 2H), 0.86 (d,  $J = 6.6$  Hz, 3H) all sum to 18H];  $^{13}\text{C NMR}$  (151 MHz,  $\text{CDCl}_3$ )  $\delta$  172.7, 172.6, 172.4, 171.3, 170.1, 167.8, 135.44, 132.40, 131.1, 129.0, 128.8, 128.7, 128.6, 128.4, 128.2, 67.3, 67.0, 61.8, 58.3, 57.6, 56.2, 54.7, 54.6, 53.8, 48.7, 48.2, 38.7, 36.8, 36.7, 36.2, 32.1, 31.3, 30.8, 30.1, 29.9, 29.5, 29.1, 28.5, 25.2, 24.9, 24.8, 24.7, 23.6, 23.5, 23.2, 22.3, 22.1, 21.5, 20.1, 19.8, 19.0, 18.3, 17.7, 17.6, 17.31, 14.28, 14.27; IR (thin film) 2984.3, 1737.6, 1773.1, 1234.2, 1044.3  $\text{cm}^{-1}$ ; LRMS (ESI+)  $m/z$  calc'd for  $[\text{M}+\text{Na}]^+$  ( $\text{C}_{34}\text{H}_{56}\text{N}_4\text{O}_7\text{Na}$ ): 655.4, found: 655.6.

(10) Matches  $^1\text{H NMR}$  data for **7** reported in: Wenger, R. M. *Helv. Chim. Acta* **1984**, *67*, 502–525.

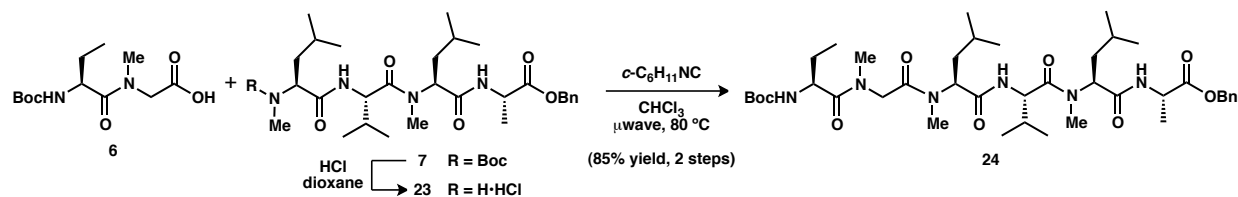

**Boc-Abu-Sar-MeLeu-Val-MeLeu-Ala-OBn (24).** Tetrapeptide **7** (63.2 mg, 0.1 mmol) was treated with 4 M HCl in dioxane (0.6 mL), and the resulting mixture was stirred for 10 min. The reaction mixture was co-evaporated with toluene to give the corresponding deprotected tetrapeptide **23** as the amine hydrochloride salt in essentially quantitative yield. This material was carried directly into the next step without further purification.

To a solution of dipeptide **6**<sup>2</sup> (13 mg, 0.046 mmol) in CHCl<sub>3</sub> (1 mL) was added compound **23** (13 mg, 0.023 mmol) and cyclohexyl isonitrile (8.6 μL, 0.069 mmol). The reaction mixture was stirred for 45 min at 80 °C under microwave irradiation. The resulting solution was purified directly by flash chromatography (3:1 hexanes/acetone) to give hexapeptide **24** (15.4 mg, 85% yield over two steps).  $[\alpha]_D^{20} = -135.0^\circ$  (*c* = 1.0, CHCl<sub>3</sub>); <sup>1</sup>H NMR (600 MHz, CDCl<sub>3</sub>) δ [7.95 (d, *J* = 6.5 Hz), 7.45 (d, *J* = 7.9 Hz), 7.38 – 7.28 (m), 6.90 (d, *J* = 8.7 Hz), 6.80 (d, *J* = 8.7 Hz), 6.69 – 6.38 (m), 5.80 (d, *J* = 8.7 Hz), 5.57 (d, *J* = 8.6 Hz), 5.27 – 5.00 (m), 4.87 (d, *J* = 3.5 Hz), 4.71 – 4.63 (m), 4.60 (t, *J* = 6.7 Hz), 4.55 – 4.49 (m), 4.47 (td, *J* = 7.1, 3.3 Hz), 4.41 (d, *J* = 15.8 Hz), *all sum to 14H*], [3.90 (d, *J* = 15.8 Hz), 3.78 (d, *J* = 15.9 Hz), 3.61 (d, *J* = 15.5 Hz), *all sum to 1H*], [3.35 – 3.29 (m), 3.27 (d, *J* = 16.7 Hz), 3.22 – 3.14 (m), 3.11 – 3.05 (m), 3.03 (s), 2.96 (t, *J* = 8.6 Hz), 2.85 – 2.70 (m), *all sum to 10H*], [2.29 (ddd, *J* = 13.3, 10.6, 4.8 Hz), 2.10 – 2.00 (m), 1.81 (dq, *J* = 18.2, 6.0, 4.8 Hz), 1.78 – 1.70 (m), 1.68 – 1.56 (m), 1.42 (s), 1.38 (d, *J* = 7.2 Hz), 1.35 (d, *J* = 7.1 Hz), *all sum to 21H*], 1.03 – 0.77 (m, 24H); <sup>13</sup>C NMR (151 MHz, CDCl<sub>3</sub>) δ 173.7, 173.5, 173.4, 173.0, 172.5, 172.44, 172.39, 172.0, 171.8, 171.7, 170.7, 170.5, 170.2, 170.1, 169.8, 169.2, 169.1, 168.6, 168.4, 156.0, 155.9, 155.9, 135.78, 135.76, 135.4, 128.8, 128.74, 128.69, 128.68, 128.66, 128.65, 128.59, 128.41, 128.38, 128.37, 128.34, 128.32, 128.29, 128.27, 128.23, 128.22, 128.19, 128.11, 79.86, 79.81, 79.77, 67.34, 67.01, 67.00, 58.6, 58.5, 58.3, 55.3, 55.2, 55.1, 54.9, 54.4, 54.3, 52.2, 51.8, 51.6, 51.5, 50.2, 50.1, 50.0, 48.7, 48.3, 38.8, 37.6, 37.4, 37.2, 37.0, 36.5, 36.4, 36.3, 36.24, 36.19, 31.1, 31.0, 30.92, 30.88, 30.6, 30.5, 29.8, 29.4, 29.2, 28.49, 28.47, 28.45, 26.1, 25.8, 25.4, 25.2, 25.13, 25.10, 25.08, 24.90, 24.88, 24.84, 24.6, 23.63, 23.57, 23.4, 23.19, 23.16, 23.14, 23.11, 23.0, 22.5, 22.3, 22.2, 22.1, 22.04, 22.02, 22.0, 21.8, 21.61, 21.55, 20.1, 20.0, 19.53, 19.48, 19.4, 19.3, 18.22, 18.16, 18.14, 18.0, 17.9, 17.4, 17.30, 17.28, 10.1, 9.9, 9.79, 9.75, 9.70; IR (thin film) 3314.1, 2962.1, 2872.5, 2360.4, 1639.2 cm<sup>-1</sup>; LRMS (ESI+) *m/z* calc'd for [M+Na]<sup>+</sup> (C<sub>41</sub>H<sub>68</sub>N<sub>6</sub>O<sub>9</sub>Na): 811.5, found 811.7.

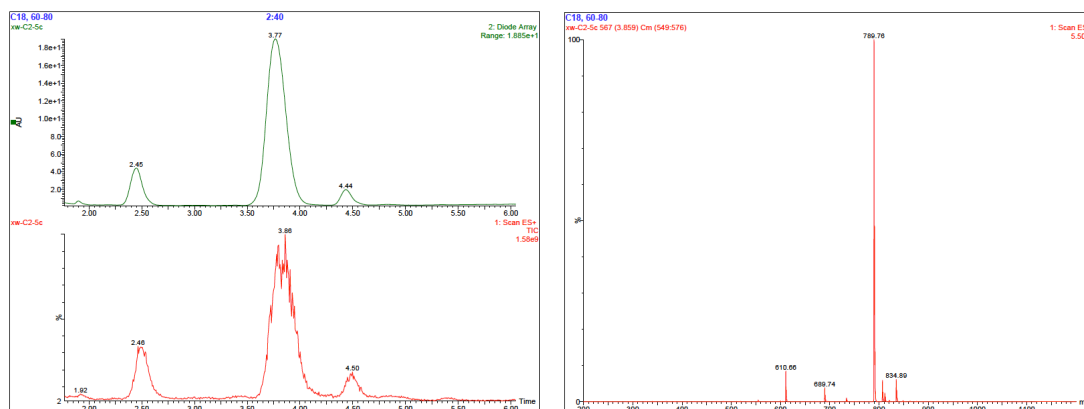

**Figure S-5.** (Left) UV and MS traces from UPLC-MS analysis of the crude reaction mixture containing hexapeptide **24**; retention time = 3.77 min, gradient 60–80% CH<sub>3</sub>CN/H<sub>2</sub>O with 0.05% TFA over 6 min at a flow rate of 0.3 mL/min, C18 column. (Right) ESI-MS of compound **24**; LRMS (ESI+) *m/z* calc'd for [M+H]<sup>+</sup> (C<sub>41</sub>H<sub>68</sub>N<sub>6</sub>O<sub>9</sub>): 789.50, found: 789.76.

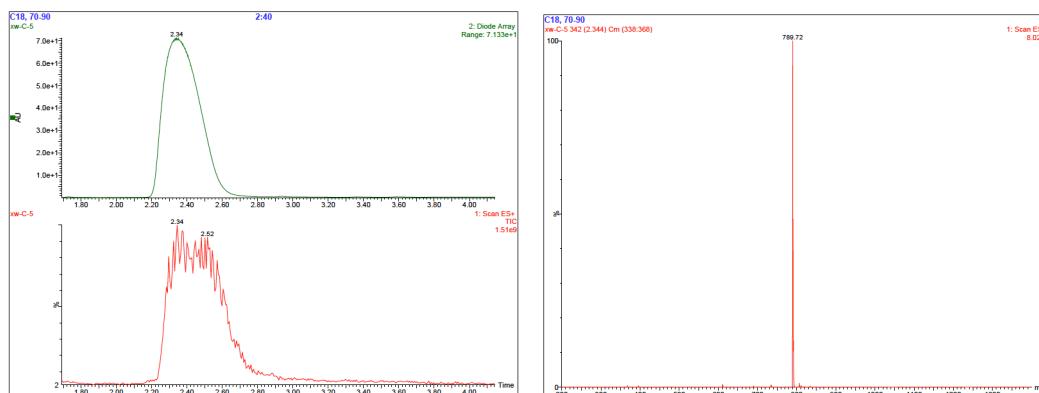

**Figure S-6.** (Left) UV and MS traces from UPLC-MS analysis of purified hexapeptide **24**; retention time = 2.34 min, gradient 70–90% CH<sub>3</sub>CN/H<sub>2</sub>O with 0.05% TFA over 6 min at a flow rate of 0.3 mL/min, C18 column. (Right) ESI-MS of compound **24**; LRMS (ESI+) *m/z* calc'd for [M+H]<sup>+</sup> (C<sub>41</sub>H<sub>68</sub>N<sub>6</sub>O<sub>9</sub>): 789.50, found: 789.72.



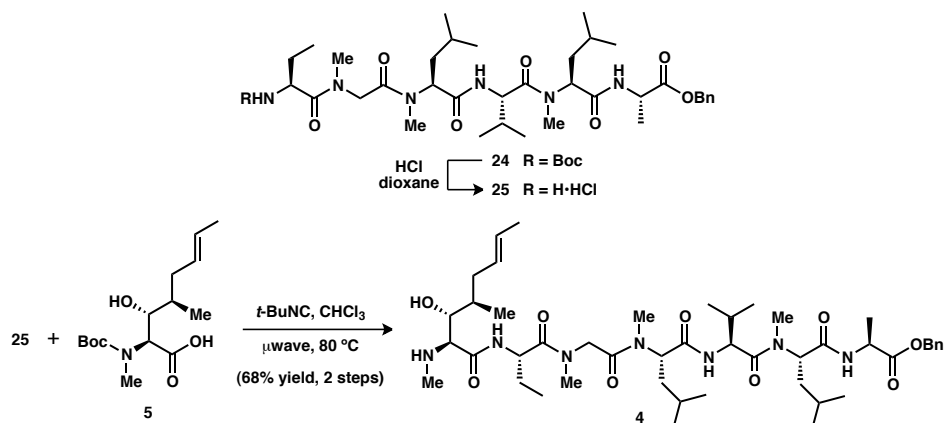

**H-MeBmt-Abu-Sar-MeLeu-Val-MeLeu-Ala-OBn (4).** Hexapeptide **24** (78.9 mg, 0.1 mmol) was treated with 4 M HCl in dioxane (0.6 mL), and the resulting mixture was stirred for 10 min. The reaction mixture was co-evaporated with toluene to give the corresponding deprotected hexapeptide **25** as the amine hydrochloride salt in essentially quantitative yield. This material was carried directly into the next step without further purification.

To a solution of Boc-MeBmt-OH (**5**) (36 mg, 0.12 mmol) in  $\text{CHCl}_3$  (2 mL) was added compound **25** (55 mg, 0.076 mmol) and *t*-butyl isonitrile (34  $\mu\text{L}$ , 0.3 mmol). The reaction mixture was stirred for 45 min at 80 °C under microwave irradiation. The volatiles were removed at low pressure, and the residue was purified by flash chromatography (20:1  $\text{CH}_2\text{Cl}_2/\text{MeOH}$ ) to give heptapeptide **4** (45 mg, 68% yield over two steps).  $[\alpha]_D^{20} = -139.0^\circ$  ( $c = 1.0$ ,  $\text{CHCl}_3$ );  $^1\text{H NMR}$  (600 MHz,  $\text{CDCl}_3$ , mixture of several rotamers):  $\delta$  [8.07 (d,  $J = 6.4$  Hz), 7.97 (s), 7.84 (d,  $J = 7.7$  Hz), 2H], 7.33 (m, 5H), 5.50 – 5.25 (m, 1H), 5.20 (dd,  $J = 12.4$ , 6.5 Hz, 1H), 5.11 (dd,  $J = 25.2$ , 12.3 Hz, 1H), 5.06 – 4.91 (m, 1H), 4.81 (dd,  $J = 13.4$ , 6.4 Hz, 2H), [4.67 – 4.61 (m), 4.55 (q,  $J = 13.1$ , 11.2 Hz), 4.44 (tq,  $J = 19.0$ , 6.5, 5.6 Hz), *all sum to 4H*], [4.10 (s), 3.99 (s), 3.88 (app. d,  $J = 4.9$  Hz), 3.85 – 3.81 (m), 3.77 – 3.71 (m), 3.54 (d,  $J = 14.5$  Hz), *all sum to 3H*], [3.40 (s), 3.36 (s), 3.34 (s), 3.30 (s), 3.28 (s), 3.22 (s), 3.19 (s), 3.16 (s), 3.07 (s), 3.05 (s), 3.02 (s), 3.01 (s), 2.85 (s), 2.81 (s), 2.79 (s), 2.78 (s), 2.75 (s), 2.74 (s), *all sum to 12H*], [2.46 – 2.25 (m), 2.21 (dt,  $J = 21.4$ , 7.3 Hz), 2.06 (dt,  $J = 19.8$ , 5.4 Hz), *all sum to 3H*], 1.91 (ddd,  $J = 29.6$ , 14.6, 5.6 Hz), 1.83 (dt,  $J = 14.1$ , 7.1 Hz), 1.75 – 1.65 (m), 1.62 (d,  $J = 5.8$  Hz), 1.59 (d,  $J = 6.1$  Hz), 1.49 – 1.41 (m), 1.37 (dd,  $J = 7.2$ , 5.1 Hz), *all sum to 13H*], [1.25 (s), 1.05 (d,  $J = 6.5$  Hz), 0.99 (d,  $J = 6.5$  Hz), 0.97 – 0.90 (m), 0.90 – 0.80 (m), 0.76 (d,  $J = 6.5$  Hz), *all sum to 21H*]; IR (thin film) 3303.5, 2963.1, 2359.5, 1672.9  $\text{cm}^{-1}$ ; LRMS (ESI+)  $m/z$  calc'd for  $[\text{C}_{46}\text{H}_{77}\text{N}_7\text{O}_9 + \text{Na}]^+$  ( $\text{C}_{46}\text{H}_{77}\text{N}_7\text{O}_9\text{Na}$ ): 894.6, found: 894.9.

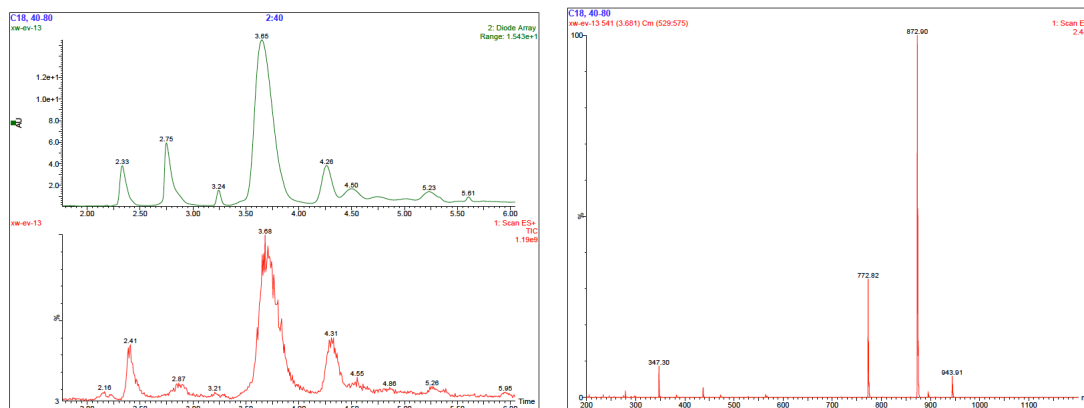

**Figure S-7.** (Left) UV and MS traces from UPLC-MS analysis of the crude reaction mixture containing heptapeptide **4**; retention time = 3.65 min, gradient 40–80% CH<sub>3</sub>CN/H<sub>2</sub>O with 0.05% TFA over 6 min at a flow rate of 0.3 mL/min, C18 column. (Right) ESI-MS of compound **4**; LRMS (ESI+)  $m/z$  calc'd for [M+H]<sup>+</sup> (C<sub>46</sub>H<sub>77</sub>N<sub>7</sub>O<sub>9</sub>): 872.6, found: 872.9.

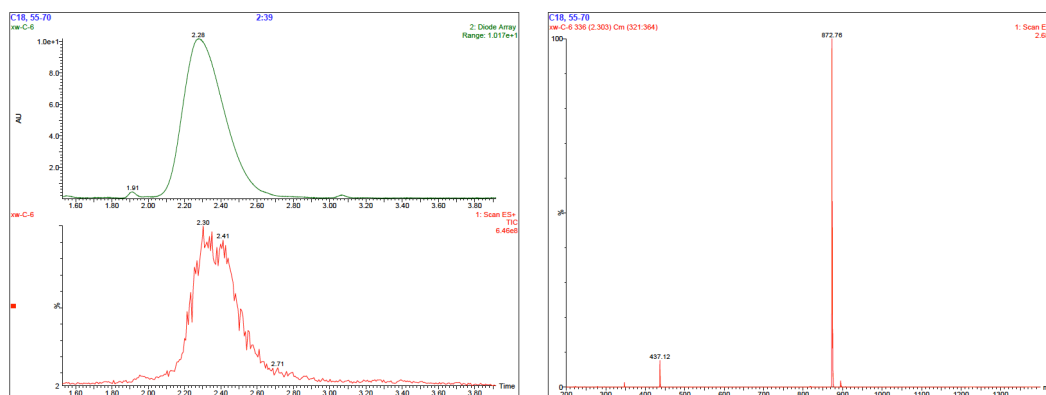

**Figure S-8.** (Left) UV and MS traces from UPLC-MS analysis of purified heptapeptide **4**; retention time = 2.28 min, gradient 55–70% CH<sub>3</sub>CN/H<sub>2</sub>O with 0.05% TFA over 6 min at a flow rate of 0.3 mL/min, C18 column. (Right) ESI-MS of compound **4**; LRMS (ESI+)  $m/z$  calc'd for [M+H]<sup>+</sup> (C<sub>46</sub>H<sub>77</sub>N<sub>7</sub>O<sub>9</sub>): 872.6, found: 872.8.

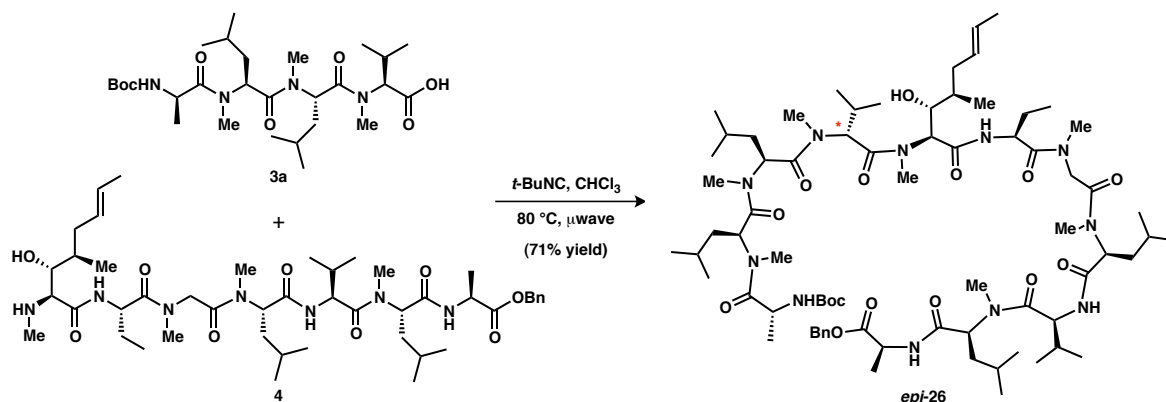

**Boc-D-Ala-MeLeu-MeLeu-D-MeVal-MeBmt-Abu-Sar-MeLeu-Val-MeLeu-Ala-OBn (*epi-26*). Type IIa method:**

To a solution of tetrapeptide acid **3a** (11 mg, 0.02 mmol) in  $\text{CHCl}_3$  (0.5 mL) was added heptapeptide **4** (10 mg, 0.012 mmol) and *t*-butyl isonitrile (6.8  $\mu\text{L}$ , 0.06 mmol). The reaction mixture was stirred for 45 min at 80°C under microwave irradiation. The volatiles were removed at low pressure, and the residue was purified by flash chromatography (15:1  $\text{CH}_2\text{Cl}_2/\text{MeOH}$ ) to give undeca-peptide ***epi-26*** (12 mg, 71% yield).  $[\alpha]_D^{20} = -112.0^\circ$  ( $c = 0.8$ ,  $\text{CHCl}_3$ );  $^1\text{H NMR}$  (600 MHz,  $\text{CDCl}_3$ ),  $^1\text{H NMR}$  (600 MHz,  $\text{CDCl}_3$ , mixture of rotamers)  $\delta$  [8.16 (s), 7.70 (s), 7.15 (s) various N–H], 7.39 – 7.27 (m, 5H), [5.51 (d,  $J = 7.4$  Hz), 5.46 – 5.28 (m), 5.27 – 5.02 (m), 4.96 (s), 4.93 – 4.78 (m), 4.75 (s), 4.65 – 4.56 (m), 4.52 (q,  $J = 7.3$  Hz), 4.50 – 4.37 (m), *all sum to 15H*], [3.71 (s), 3.65 – 3.53 (m), 3.53 – 3.43 (m), *sum to 5H*], [3.37 (app. dd,  $J = 27.2, 10.7$  Hz), 3.31 – 3.17 (m), 3.13 (d,  $J = 22.3$  Hz), 3.06 (d,  $J = 7.6$  Hz), 3.02 – 2.87 (m), 2.87 – 2.73 (m), *all sum to 21H*], [2.52 (s), 2.44 – 2.21 (m), 1.89 (ddd,  $J = 14.2, 9.9, 4.5$  Hz), 1.80 – 1.67 (m), 1.64 – 1.56 (m), 1.52 (ddd,  $J = 20.0, 12.7, 6.3$  Hz), 1.42 (d,  $J = 1.6$  Hz), 1.38 – 1.32 (m), 1.31 – 1.22 (m), *all sum to 37H*], [1.03 (d,  $J = 6.6$  Hz), 0.98 (d,  $J = 6.6$  Hz), 0.96 – 0.84 (m), 0.83 – 0.77 (m), 0.65 (dd,  $J = 24.3, 6.4$  Hz) *all sum to 42H*]; IR (thin film) 3314.1, 2961.2, 1632.5  $\text{cm}^{-1}$ ; LRMS (ESI+)  $m/z$  calc'd for  $[\text{M}+\text{Na}]^+$  ( $\text{C}_{74}\text{H}_{127}\text{N}_{11}\text{O}_{15}\text{Na}$ ): 1432.9, found: 1433.2.

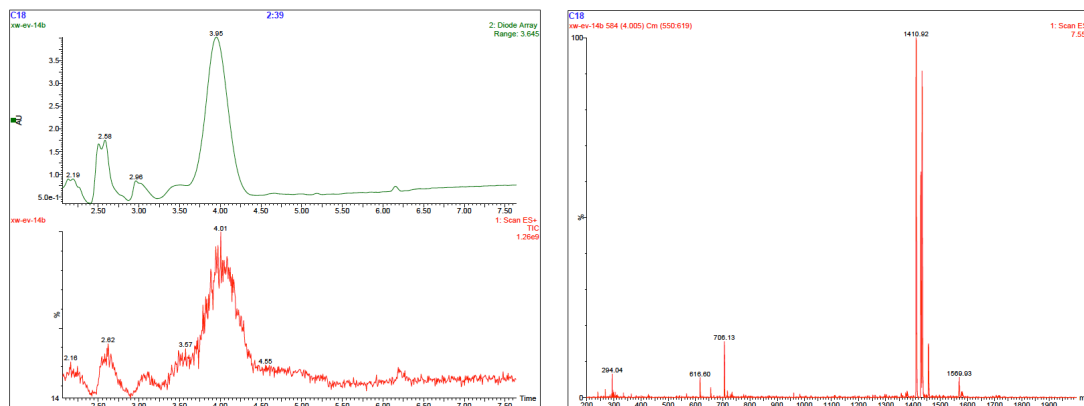

**Figure S-9.** (Left) UV and MS traces from UPLC-MS analysis of the crude reaction mixture containing undecapeptide *epi-26*; retention time = 3.95 min, gradient 70–90% CH<sub>3</sub>CN/H<sub>2</sub>O with 0.05% TFA over 6 min at a flow rate of 0.3 mL/min, C18 column. (Right) ESI-MS of compound *epi-26*; LRMS (ESI+)  $m/z$  calc'd for [M+H]<sup>+</sup> (C<sub>74</sub>H<sub>128</sub>N<sub>11</sub>O<sub>15</sub>): 1410.96, found: 1410.92.

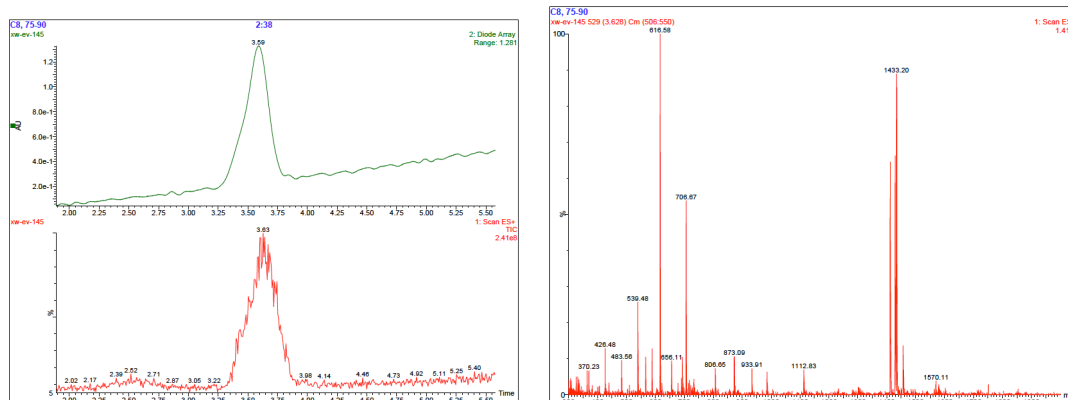

**Figure S-10.** (Left) UV and MS traces from UPLC-MS analysis of purified undecapeptide *epi-26*; retention time = 3.59 min, gradient 75–90% CH<sub>3</sub>CN/H<sub>2</sub>O with 0.05% TFA over 6 min at a flow rate of 0.3 mL/min, C18 column. (Right) ESI-MS of compound *epi-26*; LRMS (ESI+)  $m/z$  calc'd for [M+Na]<sup>+</sup> (C<sub>74</sub>H<sub>127</sub>N<sub>11</sub>O<sub>15</sub>Na): 1432.9, found: 1433.2.

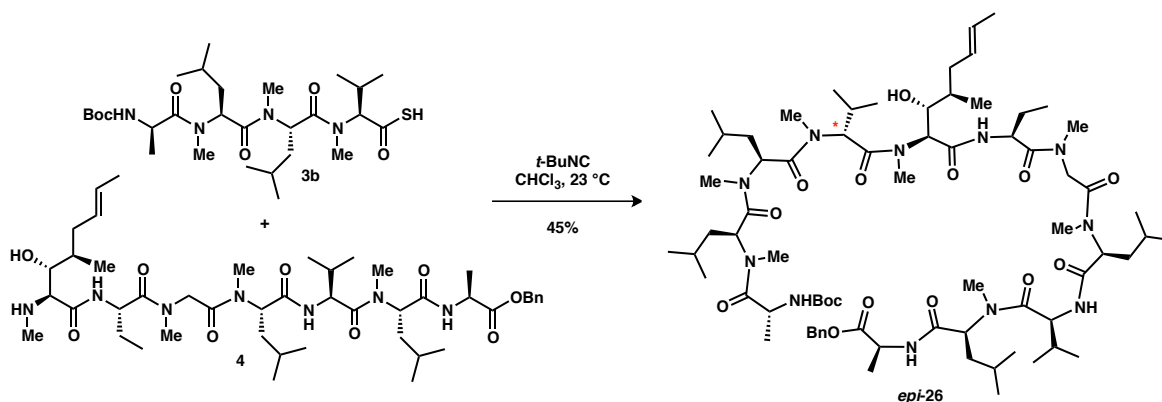

**Boc-D-Ala-MeLeu-MeLeu-D-MeVal-MeBmt-Abu-Sar-MeLeu-Val-MeLeu-Ala-OBn (epi-26). Type IIb method:**

To a solution of tetrapeptide thioacid **3b** (2.9 mg, 5  $\mu$ mol) in  $\text{CHCl}_3$  (0.2 mL) was added heptapeptide **4** (3.5 mg, 4  $\mu$ mol) and *t*-butyl isonitrile (2.3  $\mu$ L, 0.02 mmol). The resulting mixture was stirred for 16 h at room temperature. The volatiles were removed at low pressure, and the residue was purified by flash chromatography (15:1  $\text{CH}_2\text{Cl}_2/\text{MeOH}$ ) to give undecapeptide *epi*-**26** (2.5 mg, 45% yield).

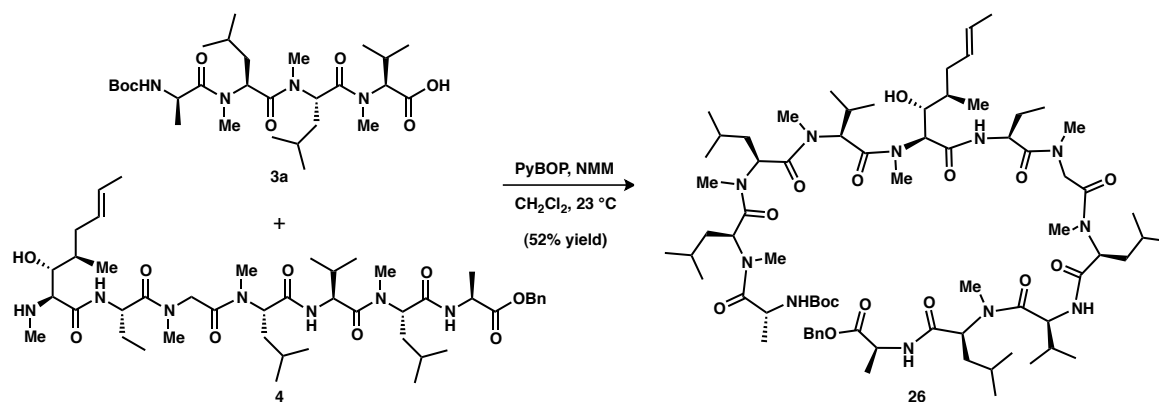

**Boc-D-Ala-MeLeu-MeLeu-MeVal-MeBmt-Abu-Sar-MeLeu-Val-MeLeu-Ala-OBn (26).** To a solution of **3a** (42 mg, 75  $\mu$ mol) in  $\text{CH}_2\text{Cl}_2$  (3 mL) was added heptapeptide **4** (65 mg, 75  $\mu$ mol), NMM (16  $\mu$ L, 0.15 mmol), and PyBOP (78 mg, 0.15 mmol). The resulting solution was stirred for 24 hours at room temperature. The mixture was then diluted with  $\text{CH}_2\text{Cl}_2$ , and washed with water and brine. The organic phase was dried over  $\text{MgSO}_4$  and evaporated at low pressure. The resulting residue was purified by flash chromatography (15:1  $\text{CH}_2\text{Cl}_2/\text{MeOH}$ ) to give undecapeptide **26** (55 mg, 52% yield).  $[\alpha]_D^{20} = -181.0^\circ$  ( $c = 1.0$ ,  $\text{CHCl}_3$ );  $^1\text{H NMR}$  (600 MHz,  $\text{CDCl}_3$ , mixture of rotamers)  $\delta$  [8.13 (d,  $J = 6.6$  Hz), 7.76 (d,  $J = 9.1$  Hz), 7.56 (d,  $J = 6.9$  Hz), 7.48 (d,  $J = 9.9$  Hz), 7.04 (d,  $J = 9.0$  Hz), 4H], 7.38 – 7.30 (m, 5H), 5.49 (ddd,  $J = 19.0, 8.3, 6.5$  Hz, 2H), 5.41 – 5.29 (m, 3H), 5.26 (dd,  $J = 10.7, 5.3$  Hz, 1H), 5.22 – 5.10 (m, 2H), 5.07 (d,  $J = 12.4$  Hz, 1H), 5.05 – 5.00 (m, 1H), 4.96 (q,  $J = 7.6$  Hz, 1H), 4.92 (d,  $J = 6.2$

Hz, 1H), 4.89 – 4.83 (m, 1H), 4.77 – 4.66 (m, 1H), 4.60 (dt,  $J = 13.9, 6.8$  Hz, 1H), [4.53 – 4.44 (m), 4.41 (d,  $J = 14.8$  Hz), 3H], 3.72 – 3.65 (m, 1H), 3.61 (dd,  $J = 22.7, 14.6$  Hz, 1H), [3.42 (s), 3.30 (s), 3.14 (s), 3.06 (s), 3.00 (s), 2.99 (s), 2.99 (s), (plus minor rotamer peaks) *all sum to 21H*], 2.55 (br. d,  $J = 13.5$  Hz, 1H), 2.35 – 2.19 (m, 2H), [1.90 (ddd,  $J = 14.3, 9.6, 5.0$  Hz), 1.78 (dt,  $J = 13.2, 7.4$  Hz), 1.71 (td,  $J = 14.0, 7.1$  Hz), 1.67 – 1.62 (m), 1.62 – 1.59 (m), 1.58 (s), 1.52 (dt,  $J = 14.0, 6.6$  Hz), 1.42 (s), 1.35 (d,  $J = 7.3$  Hz), 1.33 – 1.24 (m), 1.21 (d,  $J = 6.1$  Hz), *all sum to 37H*], 1.03 (d,  $J = 6.5$  Hz), 0.99 (d,  $J = 6.8$  Hz), 0.96 (d,  $J = 6.9$  Hz), 0.95 – 0.90 (m), 0.89 (d,  $J = 7.2$  Hz), 0.86 (d,  $J = 6.5$  Hz), 0.83 (d,  $J = 6.4$  Hz), 0.78 (d,  $J = 6.7$  Hz), 0.55 (d,  $J = 6.6$  Hz), *all sum to 42H*];  $^{13}\text{C}$  NMR (151 MHz,  $\text{CDCl}_3$ , mixture of rotamers-sample dilute)  $\delta$  173.4, 173.1, 172.6, 172.3, 171.6, 170.0, 155.5, 135.7, 129.6, 128.8, 128.7, 128.66, 128.44, 128.35, 128.3, 128.24, 128.21, 126.7, 80.9, 79.8, 76.1, 67.0, 64.8, 57.3, 55.5, 54.9, 51.7, 51.3, 50.9, 50.4, 49.5, 48.2, 46.8, 38.7, 38.3, 38.2, 36.7, 36.5, 31.8, 31.2, 30.9, 30.6, 30.4, 30.3, 28.5, 28.47, 27.6, 25.3, 25.2, 25.1, 25.06, 25.0, 23.8, 23.4, 23.4, 23.1, 23.0, 22.9, 22.6, 22.4, 21.6, 19.5, 19.4, 18.5, 18.46, 18.3, 18.2, 17.6, 15.8, 10.1, 1.2; IR (thin film) 3316.0, 2961.2, 1635.3  $\text{cm}^{-1}$ ; LRMS (ESI+)  $m/z$  calc'd for  $[\text{M}+\text{Na}]^+$  ( $\text{C}_{74}\text{H}_{127}\text{N}_{11}\text{O}_{15}\text{Na}$ ): 1432.9, found: 1433.2.

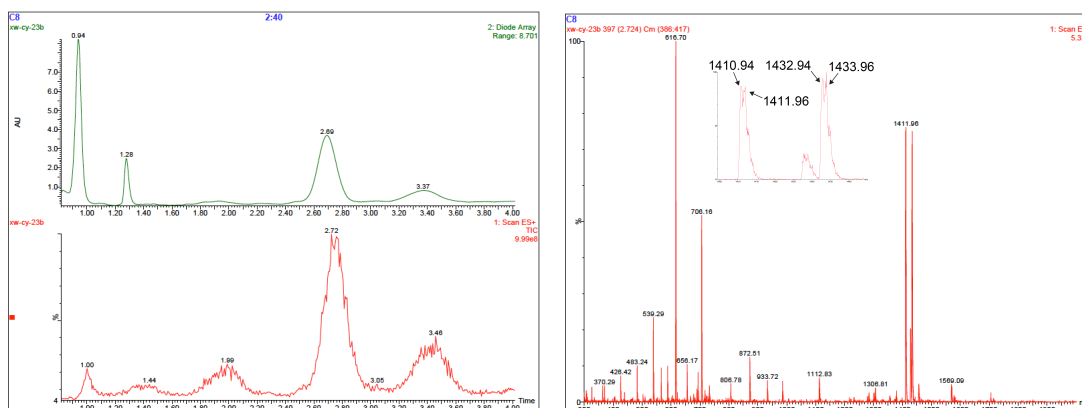

**Figure S-11.** (Left) UV and MS traces from UPLC-MS analysis of the crude reaction mixture containing undecapeptide **26**; retention time = 2.69 min, gradient 70–90%  $\text{CH}_3\text{CN}/\text{H}_2\text{O}$  with 0.05% TFA over 6 min at a flow rate of 0.3 mL/min, C18 column. (Right) ESI-MS of compound **26**; LRMS (ESI+)  $m/z$  calc'd for  $[\text{M}+\text{H}]^+$  ( $\text{C}_{74}\text{H}_{128}\text{N}_{11}\text{O}_{15}$ ): 1410.96, found: 1410.94.

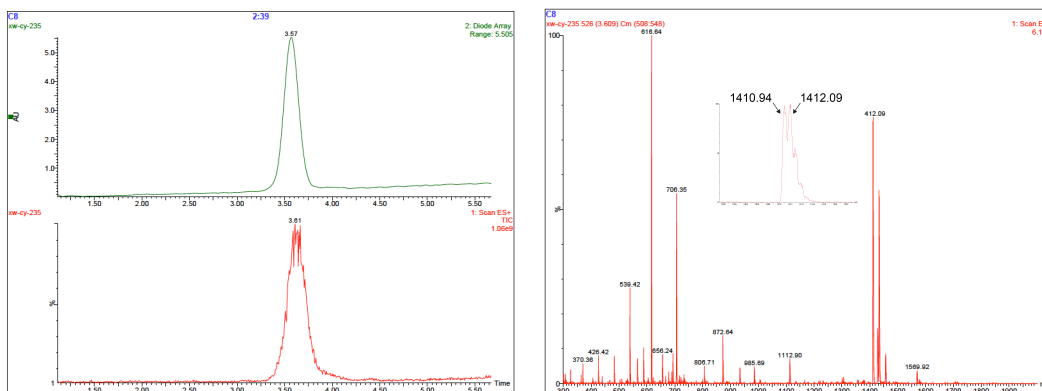

**Figure S-12.** (Left) UV and MS traces from UPLC-MS analysis of purified undecapeptide **26**; retention time = 3.57 min, gradient 75–90% CH<sub>3</sub>CN/H<sub>2</sub>O with 0.05% TFA over 6 min at a flow rate of 0.3 mL/min, C18 column. (Right) ESI-MS of compound **26**; LRMS (ESI+)  $m/z$  calc'd for [M+H]<sup>+</sup> (C<sub>74</sub>H<sub>128</sub>N<sub>11</sub>O<sub>15</sub>): 1410.96, found: 1410.94.

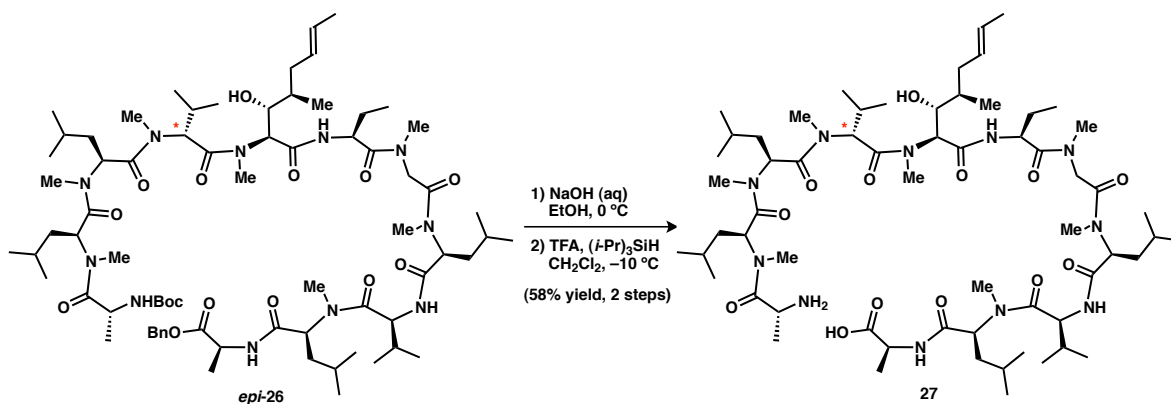

**H-D-Ala-MeLeu-MeLeu-D-MeVal-MeBmt-Abu-Sar-MeLeu-Val-MeLeu-Ala-OH (27).** Undecapeptide *epi-26* (5.0 mg, 3.5  $\mu$ mol) was dissolved in pre-cooled (0 °C) ethanol (1.0 mL), then 0.2 N NaOH (0.15 mL) was added. The resulting mixture was stirred overnight at 0 °C. Analysis of the reaction mixture by LCMS indicated that the starting material was consumed. The pH of the reaction medium was adjusted to pH 4 with a few drops of acetic acid, then the volatiles were removed at low pressure. The remainder was taken up in CH<sub>2</sub>Cl<sub>2</sub> (5 mL) and washed with brine. The organic phase was dried over MgSO<sub>4</sub>, and evaporated at low pressure to give the crude free acid, which was carried directly into the next step without further purification.

To a cooled (–10 °C) solution of the free acid (from the previous step) in CH<sub>2</sub>Cl<sub>2</sub> (1.0 mL) was added triisopropylsilane (5  $\mu$ L) and TFA (0.25 mL). The resulting mixture was stirred at –10 °C until LCMS analysis of the reaction indicated that the starting material was consumed. The reaction mixture was then diluted with CH<sub>2</sub>Cl<sub>2</sub> (5 mL) and washed with saturated NaHCO<sub>3</sub> (5 mL). The organic phase was dried over MgSO<sub>4</sub> and evaporated at low

pressure. The crude residue was purified by reversed-phase HPLC (C18 column, gradient 40–70% CH<sub>3</sub>CN/H<sub>2</sub>O with 0.05% TFA over 30 min) to give fully deprotected undecaepptide **27** (2.5 mg, 58% yield).

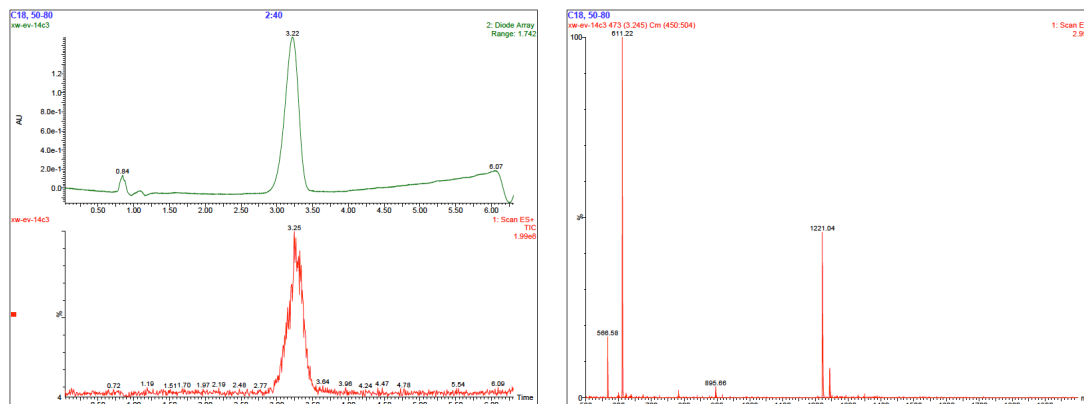

**Figure S-13.** (Left) UV and MS traces from UPLC-MS analysis of purified deprotected undecaepptide **27**; retention time = 3.22 min, gradient 50–80% CH<sub>3</sub>CN/H<sub>2</sub>O with 0.05% TFA over 6 min at a flow rate of 0.3 mL/min, C18 column. (Right) ESI-MS of compound **27**; LRMS (ESI+)  $m/z$  calc'd for [M+H]<sup>+</sup> (C<sub>62</sub>H<sub>113</sub>N<sub>11</sub>O<sub>13</sub>): 1220.85, found: 1221.04.

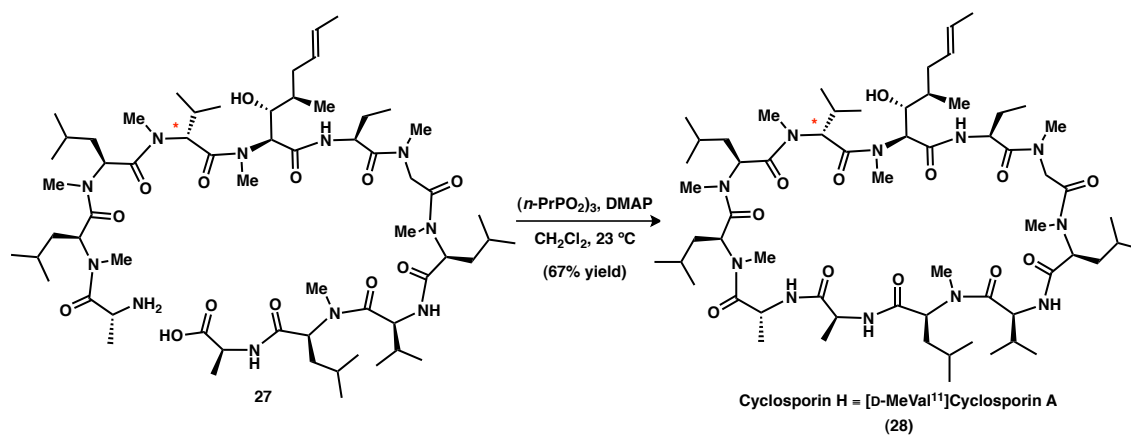

**Cyclosporin H (28).** To a solution of fully deprotected undecaepptide **27** (6 mg, 4.9 μmol) in CH<sub>2</sub>Cl<sub>2</sub> (20 mL) was added DMAP (3 mg, 24.6 μmol) and (*n*-PrO<sub>2</sub>)<sub>3</sub> (50% w/w solution in ethyl acetate, 11.7 μL, 19.6 mmol). The reaction mixture was stirred for 30 hours at room temperature. The mixture was then washed with water. The organic phase was dried over MgSO<sub>4</sub> and evaporated at low pressure. The crude residue was purified by flash chromatography (40:1 → 20:1 CH<sub>2</sub>Cl<sub>2</sub>/MeOH gradient) to give cyclosporin H (4 mg, 67% yield).  $[\alpha]_D^{20} = -165.5^\circ$ ,



( $c = 0.085$ ,  $\text{CHCl}_3$ )<sup>11</sup>;  $^1\text{H NMR}$  (600 MHz,  $\text{CDCl}_3$ ): complicated (more than 8 conformers), but similar to natural cyclosporin H. IR (thin film) 3323.7, 2960.2, 2360.4, 1633.2, 1468.5  $\text{cm}^{-1}$ ; LRMS (ESI+)  $m/z$  calc'd for  $[\text{M}+\text{Na}]^+$  ( $\text{C}_{62}\text{H}_{111}\text{N}_{11}\text{O}_{12}\text{Na}$ ): 1224.8, found: 1225.0.

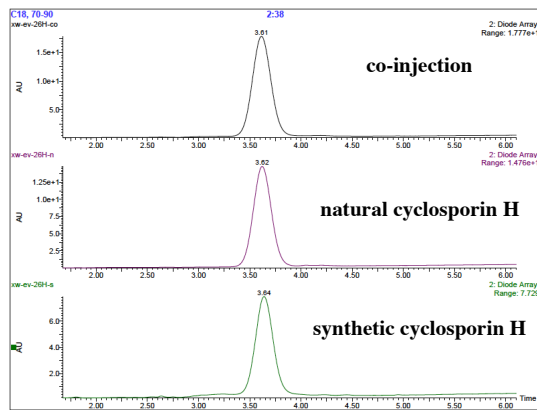

**Figure S-14.** UV traces from UPLC analysis of synthetic cyclosporin H (**28**) (bottom chromatogram, retention time = 3.61 min), natural cyclosporin H (middle chromatogram, retention time = 3.62 min), and co-injection of synthetic & natural cyclosporin H (top chromatogram, retention time = 3.64 min); gradient 70–90%  $\text{CH}_3\text{CN}/\text{H}_2\text{O}$  with 0.05% TFA over 6 min at a flow rate of 0.3 mL/min, C18 column.

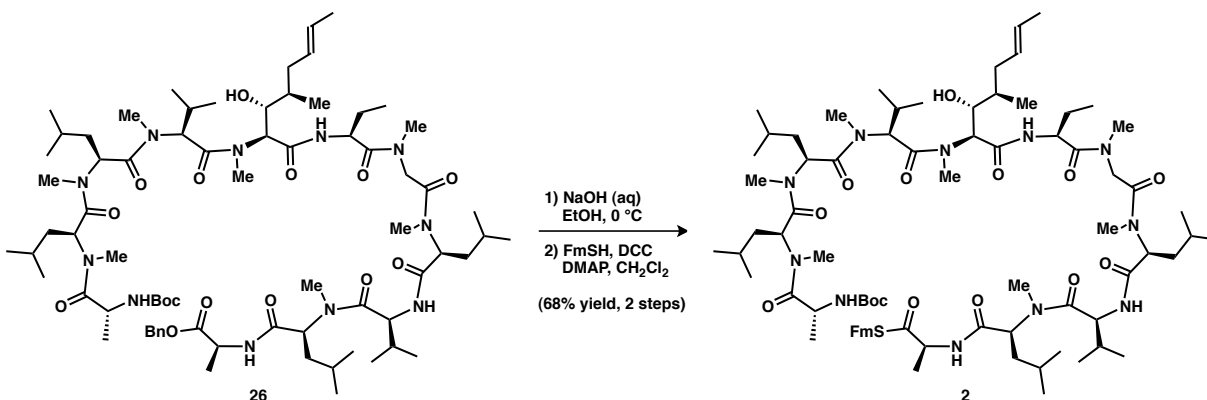

**Boc-D-Ala-MeLeu-MeLeu-MeVal-MeBmt-Abu-Sar-MeLeu-Val-MeLeu-Ala-SFm (2).** Undeca-peptide **26** (16.4 mg, 11.7  $\mu\text{mol}$ ) was dissolved in pre-cooled (0  $^\circ\text{C}$ ) ethanol (1.4 mL), then 0.2 N NaOH (0.2 mL) was added. The resulting mixture was stirred overnight at 0  $^\circ\text{C}$ . Analysis of the reaction mixture by LC-MS indicated that the starting material was consumed. The pH of the reaction medium was adjusted to pH 4 with a few drops of acetic acid, then the volatiles were removed at low pressure. The remainder was taken up in  $\text{CH}_2\text{Cl}_2$  (5 mL) and washed with brine. The organic phase was dried over  $\text{MgSO}_4$ , and evaporated at low pressure to give the crude free acid,

(11) Literature value  $-177^\circ$ , ( $c = 0.75$ ,  $\text{CHCl}_3$ ) (Traber, R.; Loosli, H.; Hofmann, H.; Kuhn, M.; Wartburg, A. V. *Helv. Chim. Acta* **1982**, *65*, 1655–1677). Purchased natural sample of cyclosporin H (AvaChem Scientific, catalog no. 1971) using our instrument:  $-167.5^\circ$ , ( $c = 0.085$ ,  $\text{CHCl}_3$ ).

which was carried directly into the next step without further purification.

To a solution of the crude free acid in  $\text{CH}_2\text{Cl}_2$  (1.5 mL) was added FmSH (12.5 mg, 58.5  $\mu\text{mol}$ ), DCC (12.0 mg, 58.5  $\mu\text{mol}$ ), and DMAP (0.7 mg, 5.85  $\mu\text{mol}$ ). The reaction mixture was stirred overnight at room temperature. Analysis of the reaction mixture by LC-MS indicated that the starting material was consumed. Purification by flash chromatography (40:1  $\text{CH}_2\text{Cl}_2/\text{MeOH}$ ) afforded undecapeptide thioester **2** (12 mg, 68% over two steps). Selected characterization data:  $[\alpha]_D^{20} = -186.6^\circ$  ( $c = 0.40$ ,  $\text{CHCl}_3$ );  $^1\text{H}$  NMR (600 MHz,  $\text{CDCl}_3$ , mixture of rotamers)  $\delta$  [7.83 (d,  $J = 9.2$  Hz), 7.77 (d,  $J = 6.9$  Hz), 1H], 7.72 (dd,  $J = 8.0$ , 3.4 Hz), 7.65 (dd,  $J = 14.4$ , 7.6 Hz), 7.63 – 7.55 (m), 7.37 (q,  $J = 7.3$ , 6.9 Hz), 7.32 – 7.27 (m), *all sum to 8H*], [7.11 (d,  $J = 8.8$  Hz), 6.82 (d,  $J = 8.8$  Hz), 6.76 (d,  $J = 7.2$  Hz), 1H], [5.50 (q,  $J = 8.4$  Hz), 5.46 – 5.37 (m), 5.33 (dd,  $J = 9.5$ , 5.3 Hz), 5.28 (dd,  $J = 10.5$ , 4.9 Hz), 5.24 (d,  $J = 11.2$  Hz), 5.21 – 5.11 (m), 5.03 (t,  $J = 7.7$  Hz), 4.95 (ddd,  $J = 14.4$ , 8.4, 6.3 Hz), 4.88 (dd,  $J = 8.9$ , 6.7 Hz), 4.65 (t,  $J = 7.8$  Hz), 4.60 (t,  $J = 7.3$  Hz), 4.54 – 4.48 (m), 4.48 – 4.41 (m), 4.21 (d,  $J = 15.1$  Hz), 4.14 (q,  $J = 5.8$  Hz), 4.02 (d,  $J = 15.5$  Hz), 3.91 – 3.78 (m), 3.63 (dd,  $J = 9.7$ , 4.3 Hz), 3.53 (dd,  $J = 13.5$ , 5.8 Hz), *all sum to 19H*], [3.44 (s), 3.41 – 3.34 (m), 3.32 (s), 3.31 (s), 3.26 (s), 3.22 (s), 3.17 (s), 3.14 (s), 3.07 (s), 3.05 (s), 3.00 (s), 2.99 (s), 2.94 (s), 2.82 (s), 2.79 (s), 2.56 (s), *all sum to 21H*], [2.47 – 2.06 (m), 1.92 (s), 1.88 – 1.69 (m), 1.68 – 1.54 (m), 1.42 (s), 1.39 – 1.33 (m), 1.29 (d,  $J = 6.8$  Hz), 1.25 (s), *all sum to 37H*], [1.22 (dd,  $J = 14.5$ , 7.4 Hz), 1.11 (d,  $J = 7.2$  Hz), 1.05 (d,  $J = 6.5$  Hz), 0.98 (dd,  $J = 6.6$ , 2.7 Hz), 0.97 – 0.87 (m), 0.88 – 0.81 (m), 0.79 (dd,  $J = 6.6$ , 3.7 Hz), 0.73 (d,  $J = 5.7$  Hz), 0.68 (dd,  $J = 9.3$ , 6.4 Hz), 0.61 (d,  $J = 6.6$  Hz), 0.52 (d,  $J = 6.6$  Hz), *all sum to 42H*];  $^{13}\text{C}$  NMR (151 MHz,  $\text{CDCl}_3$ )  $\delta$  201.1, 173.4, 172.4, 172.1, 171.0, 170.0, 155.5, 151.0, 145.6, 145.6, 145.5, 141.3, 141.2, 129.6, 129.1, 128.3, 127.9, 127.8, 127.3, 127.21, 127.20, 127.18, 127.16, 127.1, 126.6, 124.9, 124.8, 120.0, 120.0, 119.0, 79.8, 57.3, 56.9, 55.5, 55.4, 55.0, 54.5, 51.7, 51.3, 50.4, 49.5, 46.9, 46.8, 46.7, 38.9, 38.2, 37.9, 37.3, 36.8, 36.49, 36.47, 36.24, 32.18, 31.9, 31.4, 31.2, 30.8, 30.6, 30.54, 30.51, 30.40, 30.35, 30.2, 29.9, 28.5, 27.7, 27.4; IR (thin film) 3313.1, 2963.1, 2359.5, 1640.2  $\text{cm}^{-1}$ ; LRMS (ESI+)  $m/z$  calc'd for  $[\text{M}+\text{K}]^+$  ( $\text{C}_{81}\text{H}_{131}\text{N}_{11}\text{O}_{14}\text{SK}$ ): 1552.96, found: 1553.20.

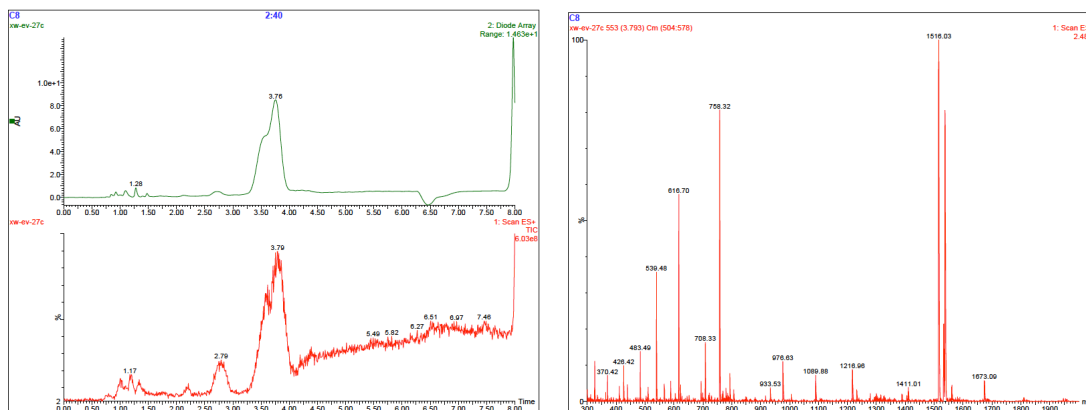

**Figure S-15.** (Left) UV and MS traces from UPLC-MS analysis of the crude reaction mixture containing undeca-peptide thioester **2**; retention time = 3.76 min, gradient 70–85% CH<sub>3</sub>CN/H<sub>2</sub>O with 0.05% TFA over 6 min at a flow rate of 0.3 mL/min, C8 column. (Right) ESI-MS of compound **2**; LRMS (ESI+)  $m/z$  calc'd for [M+H]<sup>+</sup> (C<sub>81</sub>H<sub>131</sub>N<sub>11</sub>O<sub>14</sub>S): 1515.96, found: 1516.03.

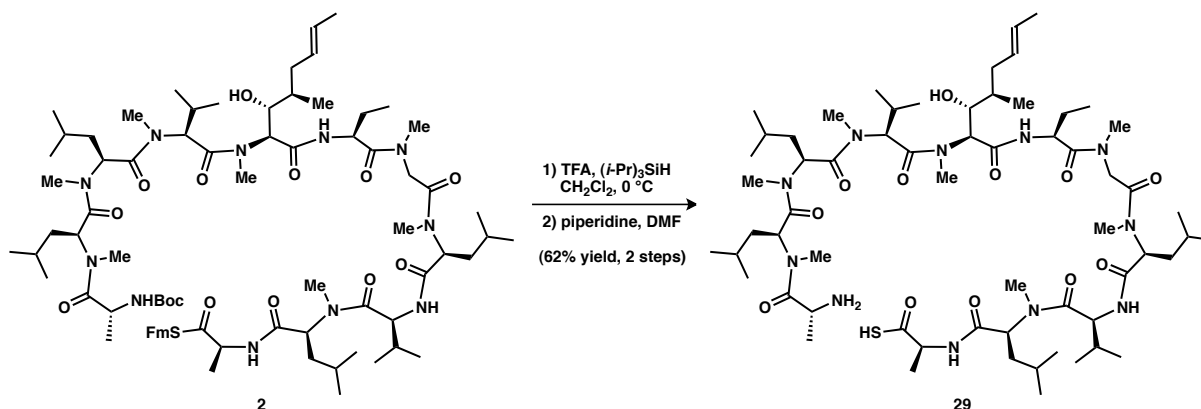

**H-D-Ala-MeLeu-MeLeu-MeVal-MeBmt-Abu-Sar-MeLeu-Val-MeLeu-Ala-SH (29).** To a cooled (0 °C) solution of undeca-peptide thioester **2** (6 mg, 3.96 μmol) in CH<sub>2</sub>Cl<sub>2</sub> (0.5 mL) was added triisopropylsilane (10 μL) and TFA (0.5 mL). The resulting mixture was stirred for 1 h at 0 °C. Analysis of the reaction mixture by LC-MS indicated that the starting material was consumed. The volatiles were removed by rotary evaporation while being kept cold in a water bath containing ice. The crude amine TFA salt was carried directly into the next step without further purification.

The crude residue from the preceding step was treated with 10% piperidine in DMF (0.3 mL) for 10 min at room temperature. Analysis of the reaction mixture by LCMS indicated that the starting material was consumed. The reaction medium was neutralized with acetic acid (0.1 mL), then purified by reversed-phase HPLC (C8 column, gradient 45–55% CH<sub>3</sub>CN/H<sub>2</sub>O with 0.05% TFA over 30 min) to give fully deprotected undeca-peptide thioacid **29** (3.0 mg, 62% yield).

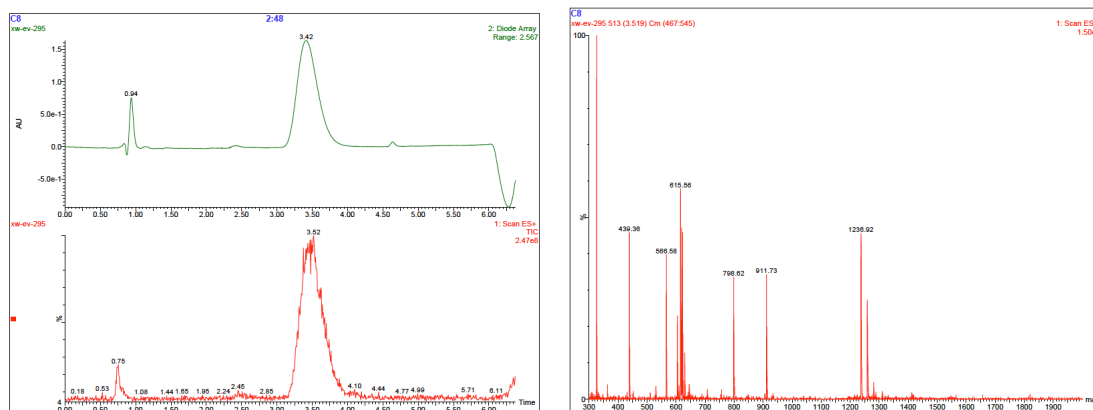

**Figure S-16.** (Left) UV and MS traces from UPLC-MS analysis of purified undecapeptide thioacid **29**; retention time = 3.42 min, gradient 55–65% CH<sub>3</sub>CN/H<sub>2</sub>O with 0.05% TFA over 6 min at a flow rate of 0.3 mL/min, C8 column. (Right) ESI-MS of compound **29**; LRMS (ESI+)  $m/z$  calc'd for [M+H]<sup>+</sup> (C<sub>62</sub>H<sub>113</sub>N<sub>11</sub>O<sub>12</sub>S): 1236.83, found: 1236.92.

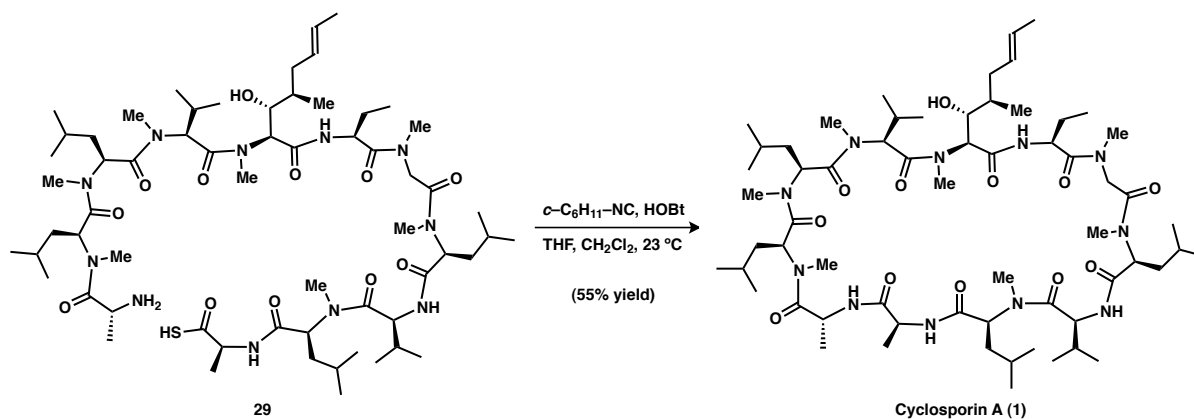

**Cyclosporin A (1).** *Type IIb method:* To a solution of **29** (3.0 mg, 2.43  $\mu\text{mol}$ ) in CH<sub>2</sub>Cl<sub>2</sub> (3 mL) was added cyclohexyl isocyanide (3  $\mu\text{L}$ , 24.3  $\mu\text{mol}$ ) and HOBt (0.65 mg, 4.86 mmol) in THF (0.2 mL). The resulting mixture was stirred for 24 h at room temperature. The volatiles were then removed at low pressure. The crude residue was purified by flash chromatography (40:1 CH<sub>2</sub>Cl<sub>2</sub>/MeOH) to give cyclosporin A (**1**) (1.6 mg, 55% yield). Spectral and analytical data were consistent with data for **1** obtained via the Type IIa method (*vide infra*).

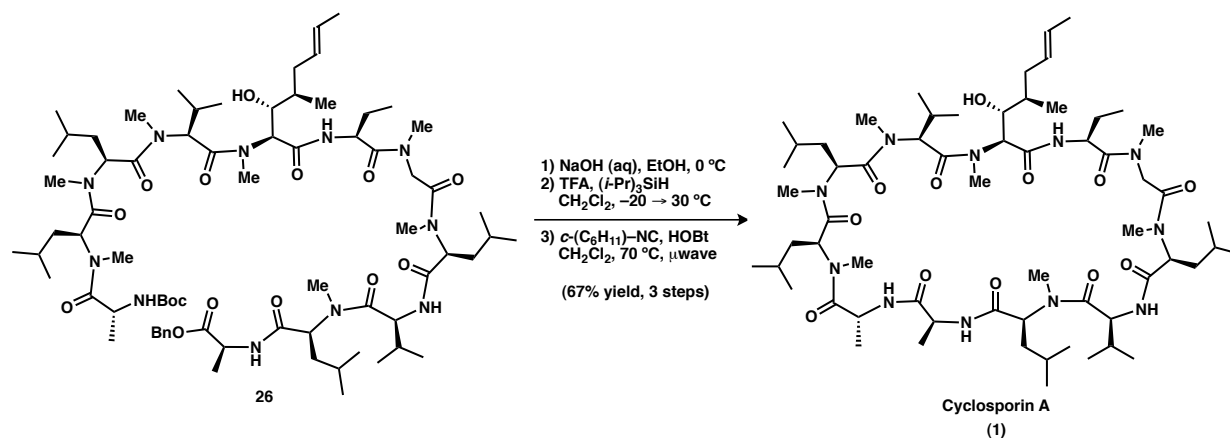

**Cyclosporin A (1). Type IIa method:** Undeca-peptide **26** (15 mg, 10.6  $\mu$ mol) was dissolved in pre-cooled (0 °C) ethanol (1.4 mL), then 0.2 N NaOH (0.2 mL) was added. The resulting mixture was stirred overnight at 0 °C. Analysis of the reaction mixture by LC-MS indicated that the starting material was consumed. The pH of the reaction medium was adjusted to pH 4 with a few drops of acetic acid, then the volatiles were removed at low pressure. The remainder was taken up in CH<sub>2</sub>Cl<sub>2</sub> (5 mL), then washed with water and brine. The organic phase was dried over MgSO<sub>4</sub>, and evaporated at low pressure to give the crude free acid, which was carried directly into the next step without further purification.

The crude free acid from the preceding step was dissolved in 1:1 CH<sub>2</sub>Cl<sub>2</sub>/TFA (1 mL) at -20 °C, then triisopropylsilane (5  $\mu$ L) was added. The resulting mixture was stirred overnight at -20 °C. Analysis of the reaction mixture by LC-MS indicated that the starting material was consumed. The reaction mixture was then diluted with CH<sub>2</sub>Cl<sub>2</sub> (5 mL), then washed with saturated NaHCO<sub>3</sub> and brine. The organic phase was dried over MgSO<sub>4</sub> and evaporated at low pressure. The crude residue was rinsed by resuspending in ether, then centrifuging and decanting the supernatant. The resulting pellet was dissolved in CH<sub>2</sub>Cl<sub>2</sub> and evaporated at low pressure. The crude fully deprotected undeca-peptide was carried into the next step without further purification.

To a solution of crude fully deprotected undeca-peptide in CH<sub>2</sub>Cl<sub>2</sub> (10 mL) was added cyclohexyl isonitrile (6  $\mu$ L, 48  $\mu$ mol) and HOBt (2.8 mg, 21.2  $\mu$ mol) in THF (0.2 mL). The resulting mixture was stirred for 20 h at 70 °C under microwave irradiation. The reaction mixture was purified directly by flash chromatography (40:1 CH<sub>2</sub>Cl<sub>2</sub>/MeOH) to give cyclosporin A (**1**) as a cloudy, white film (8.6 mg, 67% yield over three steps). Trituration of

this material in a mixed acetone/ether/hexanes solvent system resulted in the formation of a white amorphous solid,<sup>12</sup> m.p. 138–145 °C;  $[\alpha]_D^{20} = -226.3^\circ$  ( $c = 0.15$ ,  $\text{CHCl}_3$ );<sup>13</sup>  $^1\text{H NMR}$  (600 MHz,  $\text{CDCl}_3$ ):  $\delta$  8.00 (1H, d,  $J = 9.8$  Hz), 7.62 (1H, d,  $J = 7.4$  Hz), 7.47 (1H, d,  $J = 8.3$  Hz), 7.16 (1H, d,  $J = 7.9$  Hz), 5.70 (1H, dd,  $J = 4.3, 10.9$  Hz), 5.49 (1H, d,  $J = 6.0$  Hz), 5.34 (3H, comp. m), 5.12 (1H, d,  $J = 10.9$  Hz), 5.06 (1H, t,  $J = 7.1$  Hz), 5.04 (1H, dd,  $J = 7.4, 17.0$  Hz), 4.97 (1H, dd,  $J = 5.9, 9.8$  Hz), 4.83 (1H, ddd,  $J = 6.7, 6.7, 13.8$  Hz), 4.72 (1H, d,  $J = 13.9$  Hz), 4.65 (1H, app. t,  $J = 9.2$  Hz), 4.52 (1H, ddd,  $J = 7.3, 7.3, 14.6$  Hz), 3.79 (2H, m), 3.51 (3H, s), 3.40 (3H, s), 3.26 (3H, s), 3.19 (1H, d,  $J = 13.9$  Hz), 3.11 (6H, br s), 2.70 (3H, s), 2.69 (3H, s), 2.45–2.39 (2H, comp. m), 2.15–2.03 (4H, comp. m), 1.99 (1H, ddd,  $J = 3.9, 10.4, 14.5$  Hz), 1.78 (1H, m), 1.71 (1H, ddd,  $J = 7.2, 13.9, 13.9$  Hz), 1.66–1.58 (9H, comp. m), 1.50–1.21 (4H, comp. m), 1.35 (3H, d,  $J = 7.26$  Hz), 1.25 (3H, d,  $J = 6.8$  Hz), 1.07 (3H, d,  $J = 6.5$  Hz), 1.03 (3H, d,  $J = 6.6$  Hz), 1.01 (6H, d,  $J = 6.7$  Hz), 0.95 (3H, d,  $J = 6.7$  Hz), 0.94 (3H, d,  $J = 6.7$  Hz), 0.93 (3H, d,  $J = 6.5$  Hz), 0.88 (3H, d,  $J = 6.9$  Hz), 0.87 (3H, d,  $J = 6.2$  Hz), 0.87 (6H, d,  $J = 6.5$  Hz), 0.86 (3H, d,  $J = 7.3$  Hz), 0.85 (3H, d,  $J = 6.6$  Hz), 0.71 (3H, d,  $J = 6.1$  Hz);  $^{13}\text{C NMR}$  (150 MHz,  $\text{CDCl}_3$ ):  $\delta$  173.81, 173.75, 173.53, 173.45, 171.6, 171.3, 171.2, 170.4, 170.3, 170.1, 170.0, 129.7, 126.2, 74.7, 58.9, 57.9, 57.6, 55.5, 55.4, 55.3, 50.3, 48.7, 48.6, 48.2, 45.1, 40.6, 39.5, 39.0, 37.4, 36.03, 36.95, 35.6, 34.0, 31.5, 31.3, 31.1, 29.77, 29.75, 29.5, 29.3, 29.1, 25.4, 24.90, 24.85, 24.6, 24.5, 23.9, 23.8, 23.7, 23.4, 21.8, 21.1, 20.3, 19.9, 18.7, 18.4, 18.2, 18.0, 17.9, 17.7, 16.8, 15.9; IR (thin film) 3322.8, 2960.2, 1639.2, 1470.5  $\text{cm}^{-1}$ ; HRMS (ESI+)  $m/z$  calc'd for  $[\text{M}+\text{Na}]^+$  ( $\text{C}_{62}\text{H}_{111}\text{N}_{11}\text{O}_{12}\text{Na}$ ): 1224.8311, found: 1224.8345.

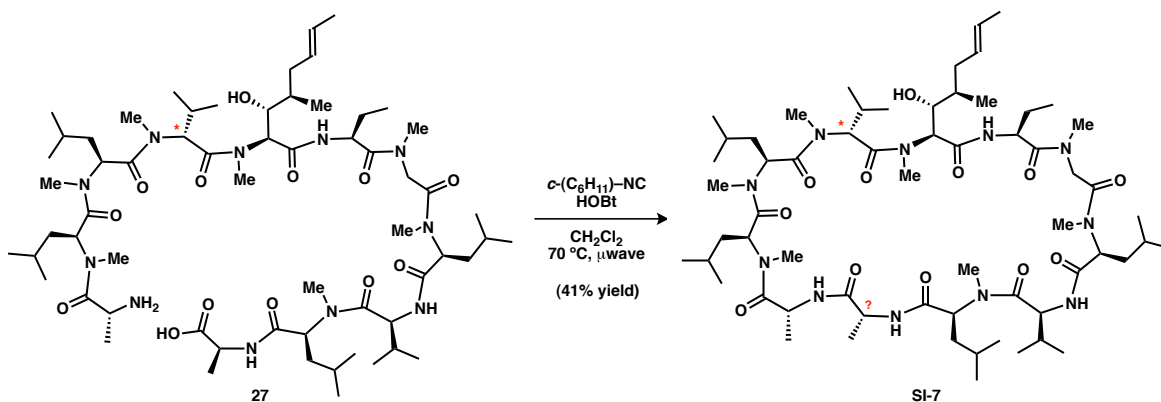

(12) The melting point reported in the literature for crystalline cyclosporin A is 148–151 °C (Rüegger, A.; Kuhn, M.; Lichti, H.; Loosli, H.; Huguenin, R.; Quiquerez, C.; von Wartburg, A. *Helv. Chim. Acta* **1976**, *59*, 1075–1092). Attempts to crystallize our synthetic material at milligram scales were unsuccessful.

(13) Literature value:  $-244^\circ$ , ( $c = 0.6$ ,  $\text{CHCl}_3$ ) (see citation in ref. 11). Purchased natural sample of cyclosporin A (Aldrich, catalog no. C3662) using our instrument:  $-227.8^\circ$ , ( $c = 0.11$ ,  $\text{CHCl}_3$ ).

**Type IIa cyclization of cyclosporin H precursor (SI-7).** To a solution of fully deprotected undecapeptide **27** (2.5 mg, 2.0  $\mu\text{mol}$ ) in  $\text{CHCl}_3$  (0.5 mL) was added cyclohexyl isonitrile (1.2  $\mu\text{L}$ , 10.2  $\mu\text{mol}$ ) and HOBt (0.56 mg, 4.1  $\mu\text{mol}$ ) in THF (0.1 mL). The resulting mixture was stirred for 15 h at 70  $^\circ\text{C}$  under microwave irradiation. Analysis of the reaction mixture by LCMS indicated the presence of a product with a mass that is consistent with macrocyclization. The volatiles were removed at low pressure, and the residue was purified by reversed-phase HPLC (C18 column, gradient 65–80%  $\text{CH}_3\text{CN}/\text{H}_2\text{O}$  with 0.05% TFA over 30 min) to give **SI-7** (1.0 mg, 41% yield). Although this compound co-elutes with cyclosporin H when co-injected on the UPLC, its  $^1\text{H}$  NMR spectrum does not match that of natural cyclosporin H or synthetic cyclosporin H (obtained by cyclizing **27** using  $(n\text{-PrPO}_2)_3$ , *vide supra*).

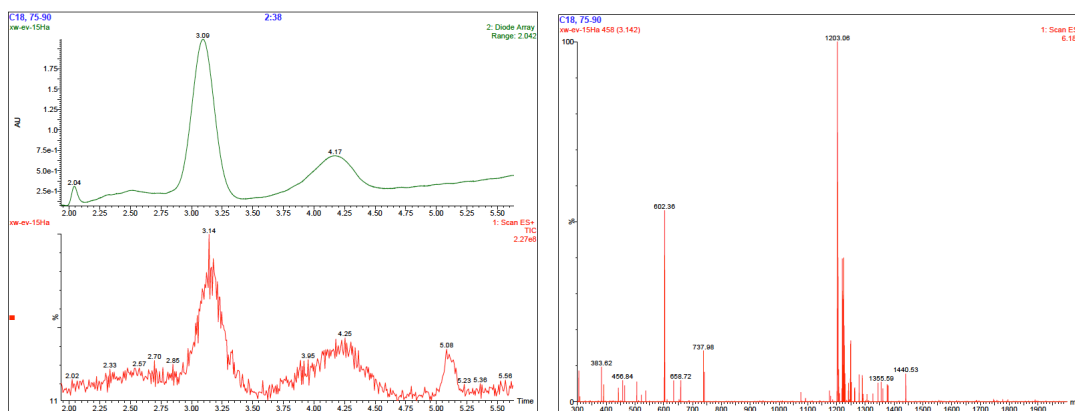

**Figure S-17.** (Left) UV and MS traces from UPLC-MS analysis of the crude reaction mixture containing compound **SI-7**; gradient 75–90%  $\text{CH}_3\text{CN}/\text{H}_2\text{O}$  with 0.05% TFA over 6 min at a flow rate of 0.3 mL/min, C18 column. (Right) ESI-MS of compound **SI-7**; LRMS (ESI+)  $m/z$  calc'd for  $[\text{M}+\text{H}]^+$  ( $\text{C}_{62}\text{H}_{112}\text{N}_{11}\text{O}_{12}$ ): 1202.84, found: 1203.06.

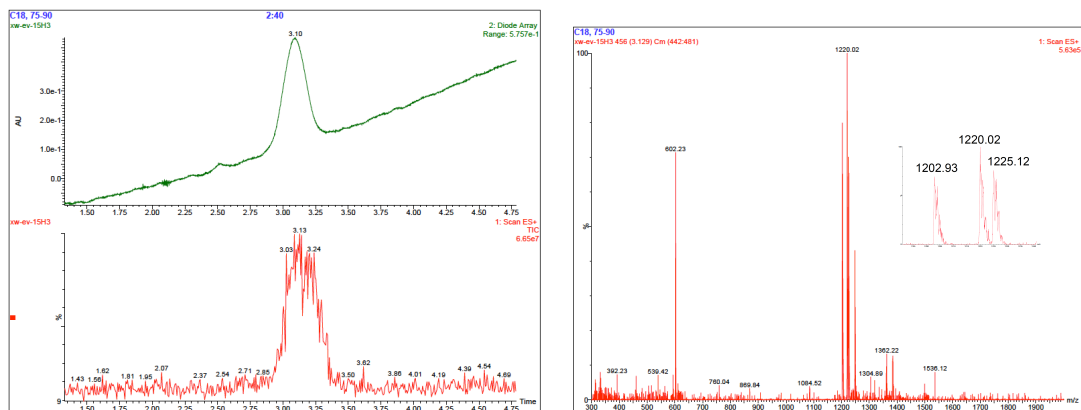

**Figure S-18.** (Left) UV and MS traces from UPLC-MS analysis of purified compound **SI-7**; gradient 75–90% CH<sub>3</sub>CN/H<sub>2</sub>O with 0.05% TFA over 6 min at a flow rate of 0.3 mL/min, C18 column. (Right) ESI-MS of compound **SI-7**; LRMS (ESI+)  $m/z$  calc'd for [M+H]<sup>+</sup> (C<sub>62</sub>H<sub>112</sub>N<sub>11</sub>O<sub>12</sub>): 1202.84, found: 1202.93.



xw-C2-6H/10  
 group Danishefsky  
 \*. wux1 xw-C2-6H (10 1) CDCl3 24.0C June\_30,2011\_11:28:51 Bruker AVIII 600MHz RRL1326: janggeum zg30 : 1H 7.500 ppm \*.  
 \_ProtonBC CDCl3 /opt/users/wux1 wux1 30

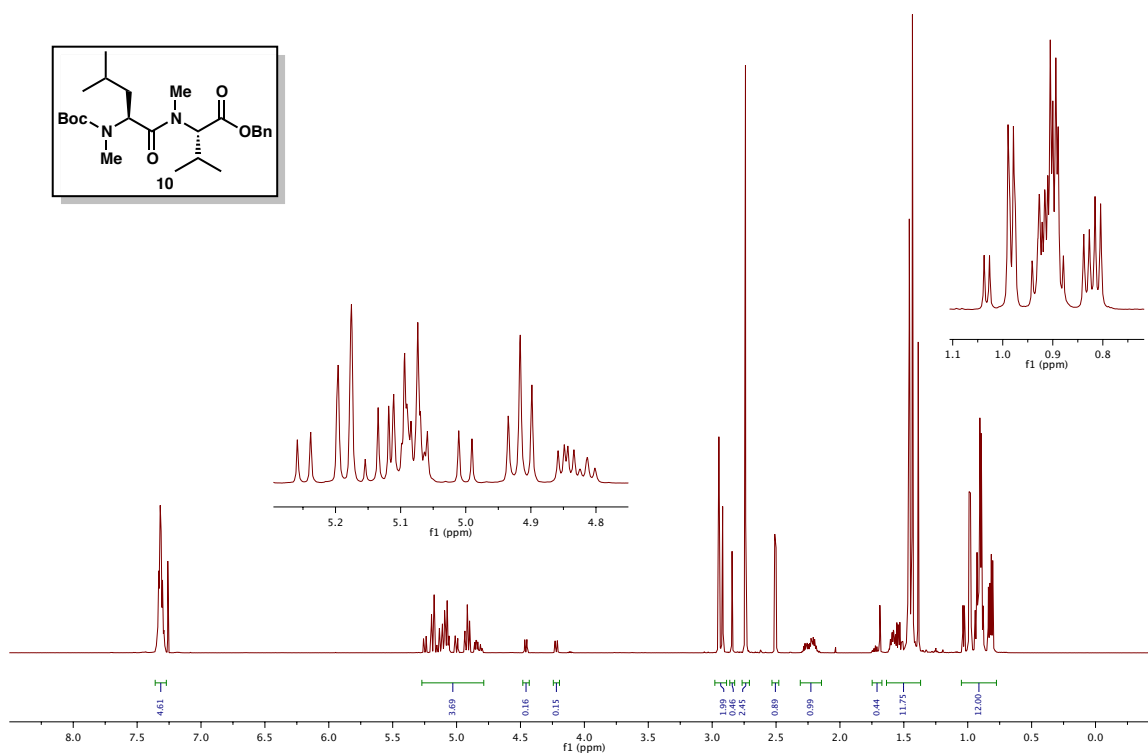

xw-C2-6C13/10  
 group Danishefsky  
 \*. wux1 xw-C2-6C13 (10 1) CDCl3 24.0C June\_30,2011\_11:31:27 Bruker AVIII 600MHz RRL1326: janggeum zgpg30 : 13C 110.000 ppm; 1H 4.500 ppm \*.  
 \_CarbonBC CDCl3 /opt/users/wux1 wux1 30

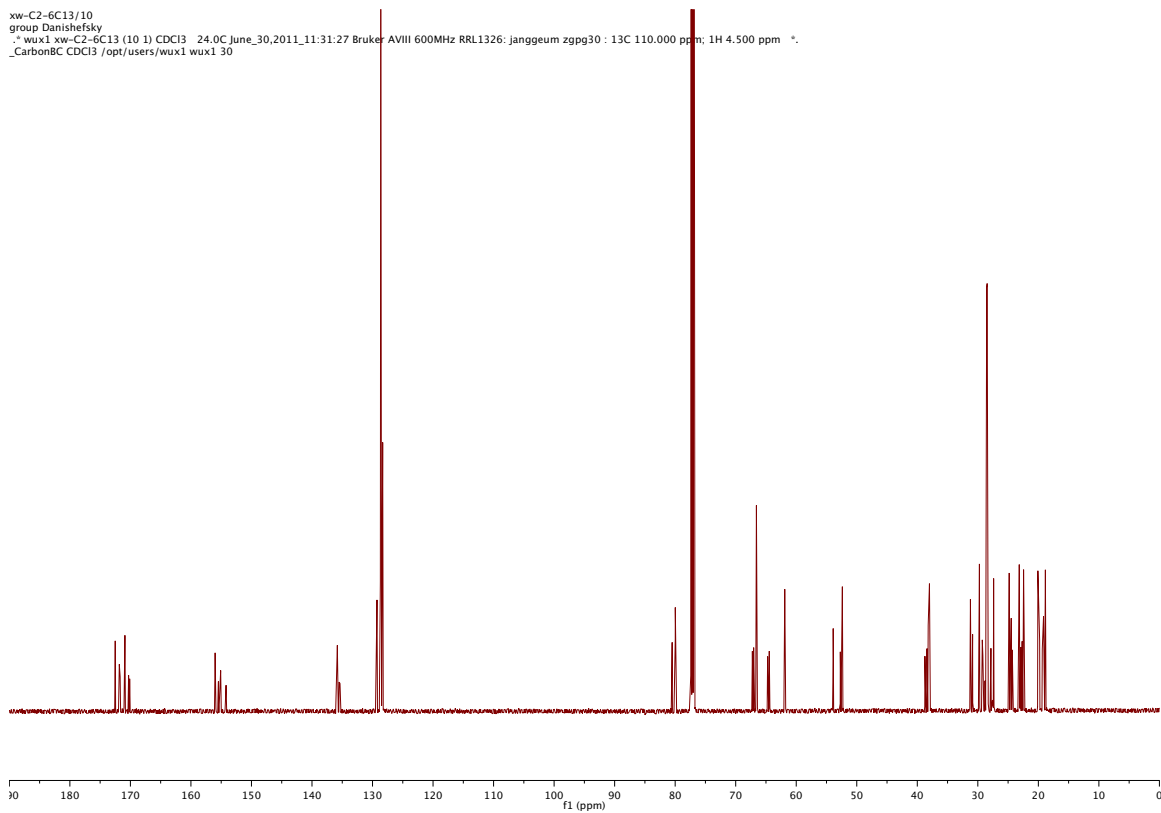





xw-c-1/10  
 group Danishefsky  
 \*.stockdj xw-c-1 (10 1) CDCl3 24.0C October\_17\_2011\_17:31:34 Bruker AVIII 600MHz RRL1326: janggeum zg30 : 1H 7.500 ppm \*.  
 :Proton\_VT CDCl3 /opt/users/stockdj/stockdj 17

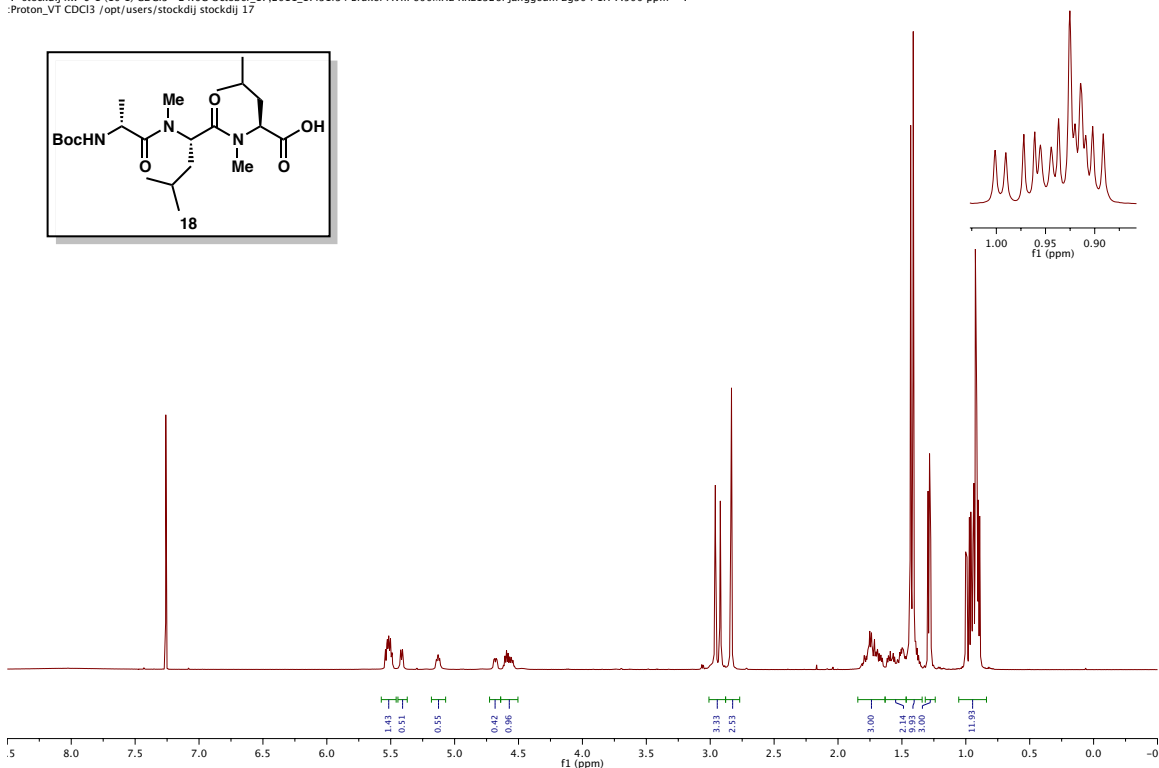

$^1\text{H}$  NMR Spectrum of Boc-D-Ala-MeLeu-MeLeu-OH (18) in  $\text{CDCl}_3$  at 600 MHz.

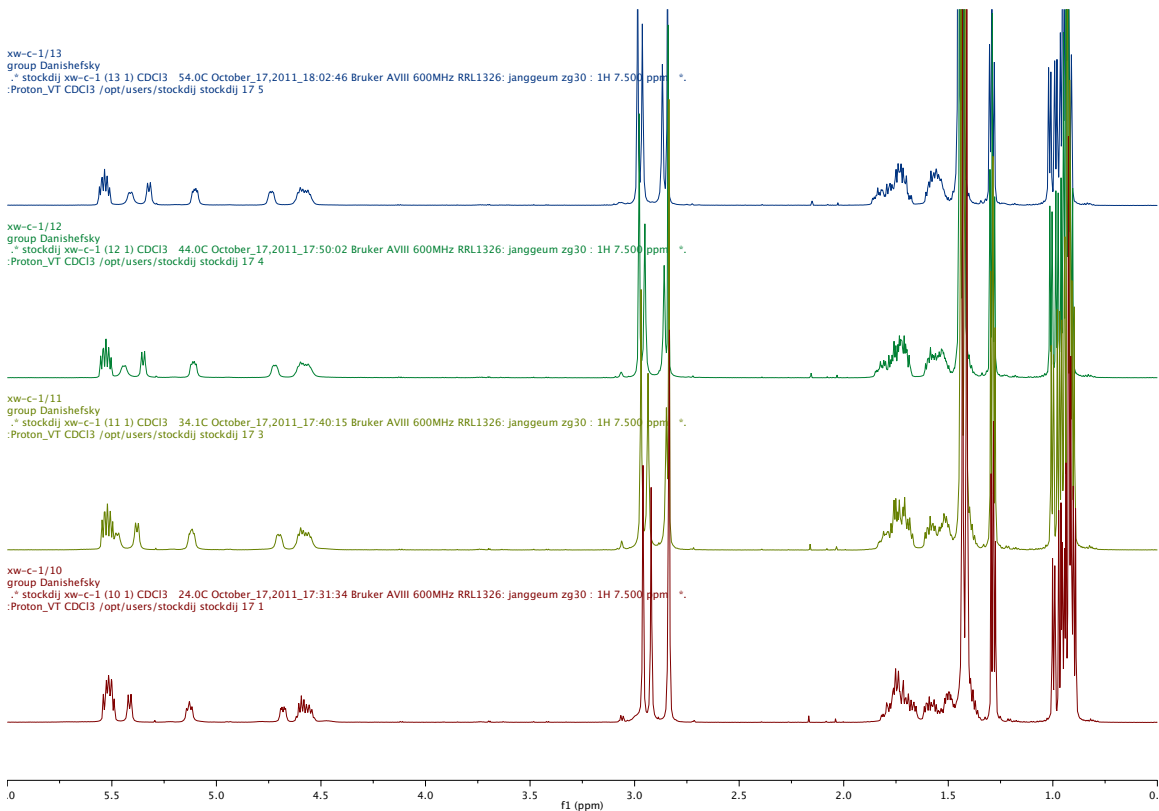

Variable Temperature  $^1\text{H}$  NMR Spectrum of Boc-D-Ala-MeLeu-MeLeu-OH (18) in  $\text{CDCl}_3$  at 600 MHz.

Proton  
Carbon .\*. stockdij xw-ev-21 (1 1) CDCl3 24.0C October\_21,2011\_18:25:25 DRX 500MHz zgpg30 13C; 1H O2=4.000 %.

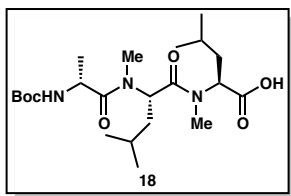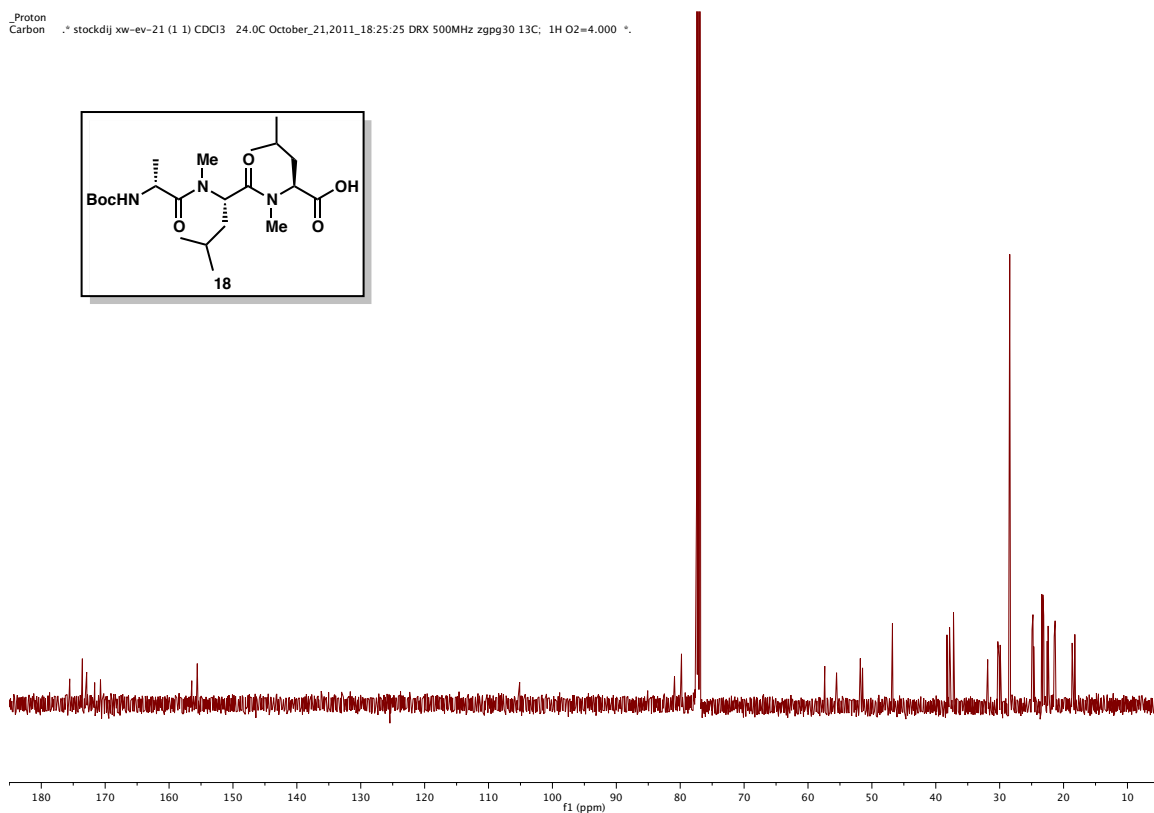

<sup>13</sup>C NMR Spectrum of **Boc-D-Ala-MeLeu-MeLeu-MeVal-OBn (18)** in CDCl<sub>3</sub> at 151 MHz.

xw-cy-21H/10  
.\* wux1 xw-cy-21H (10 1) CDCl3 24.0C October\_16,2009\_15:40:53 Bruker AVIII 600MHz RRL1326: zg30 : 1H 7.500 ppm \*

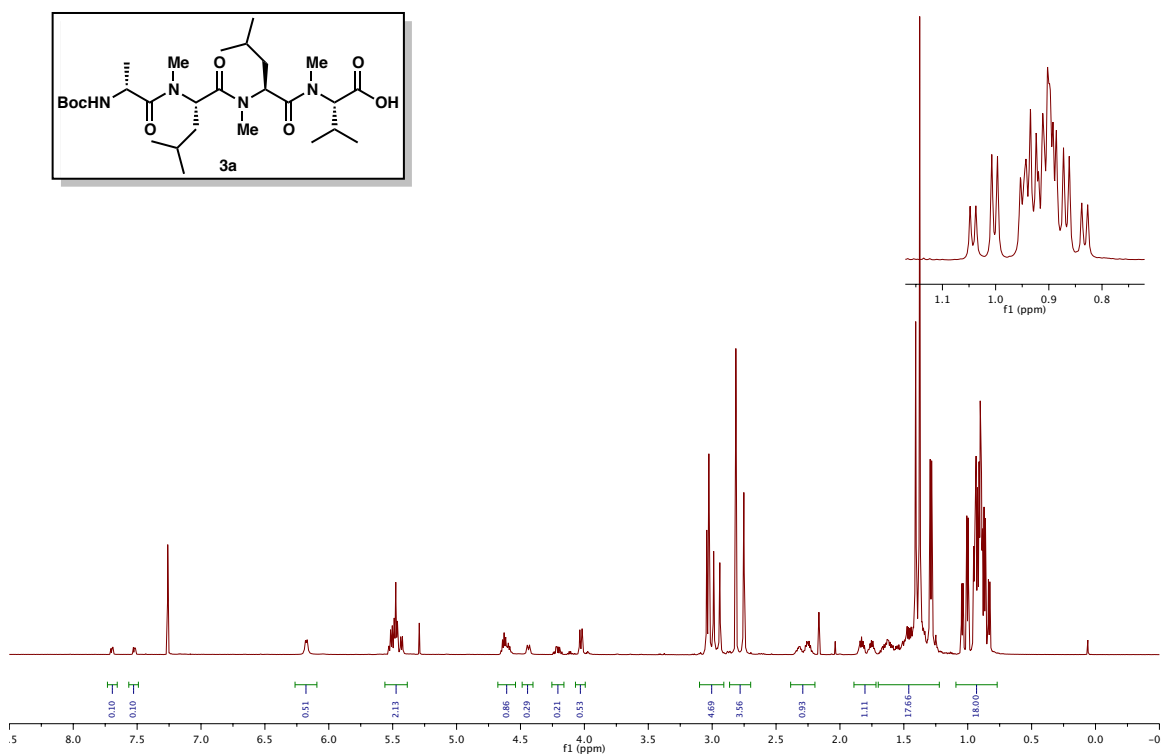

xw-cy-21C13/10  
.\* wux1 xw-cy-21C13 (10 1) CDCl3 24.0C October\_16,2009\_15:42:44 Bruker AVIII 600MHz RRL1326: zgpg30 : 13C 110.000 ppm; 1H 4.500 ppm \*

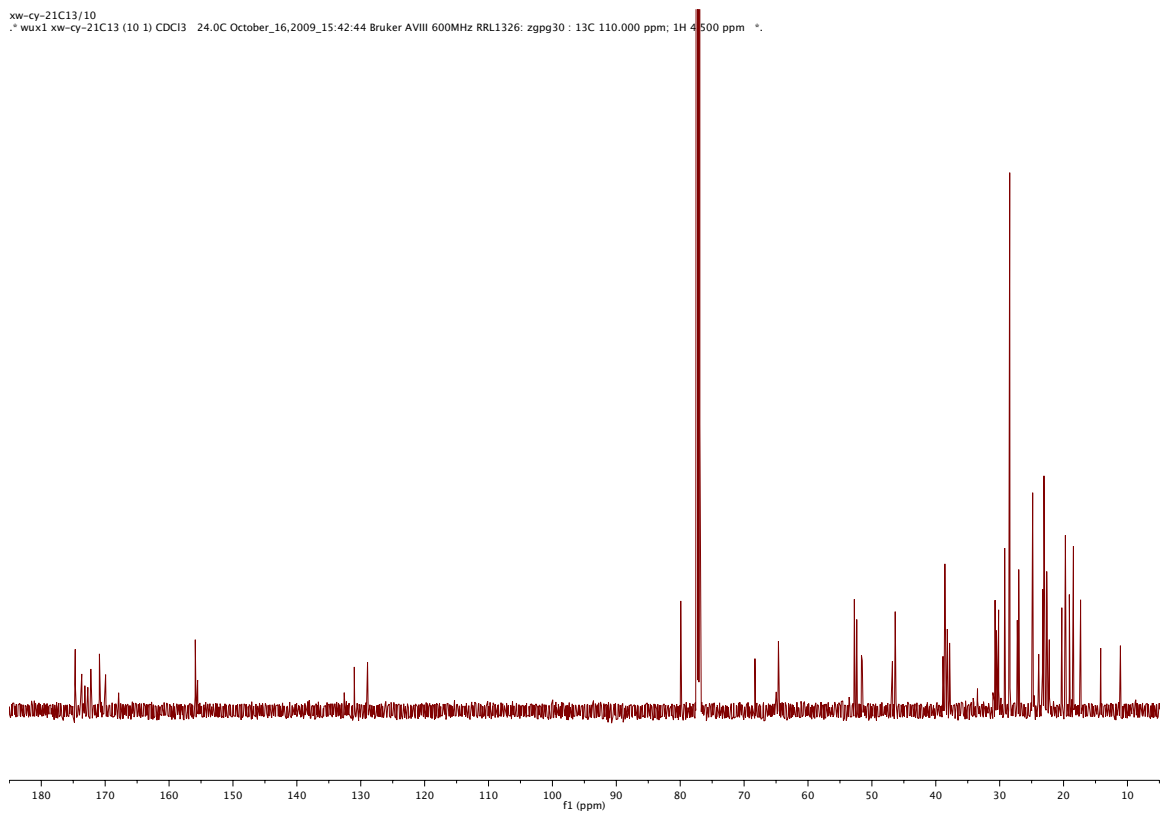

xw-ev-17H  
group Danishefsky  
\* wux1 xw-ev-17H (10 1) CDCl3 24.0C April\_27,2011\_10:52:32 Bruker AVIII 600MHz RRL1326: janggeum zg30 : 1H 7.500 ppm \*.  
\_ProtonBC CDCl3 /opt/users/wux1 wux1 10

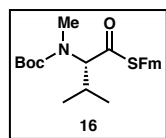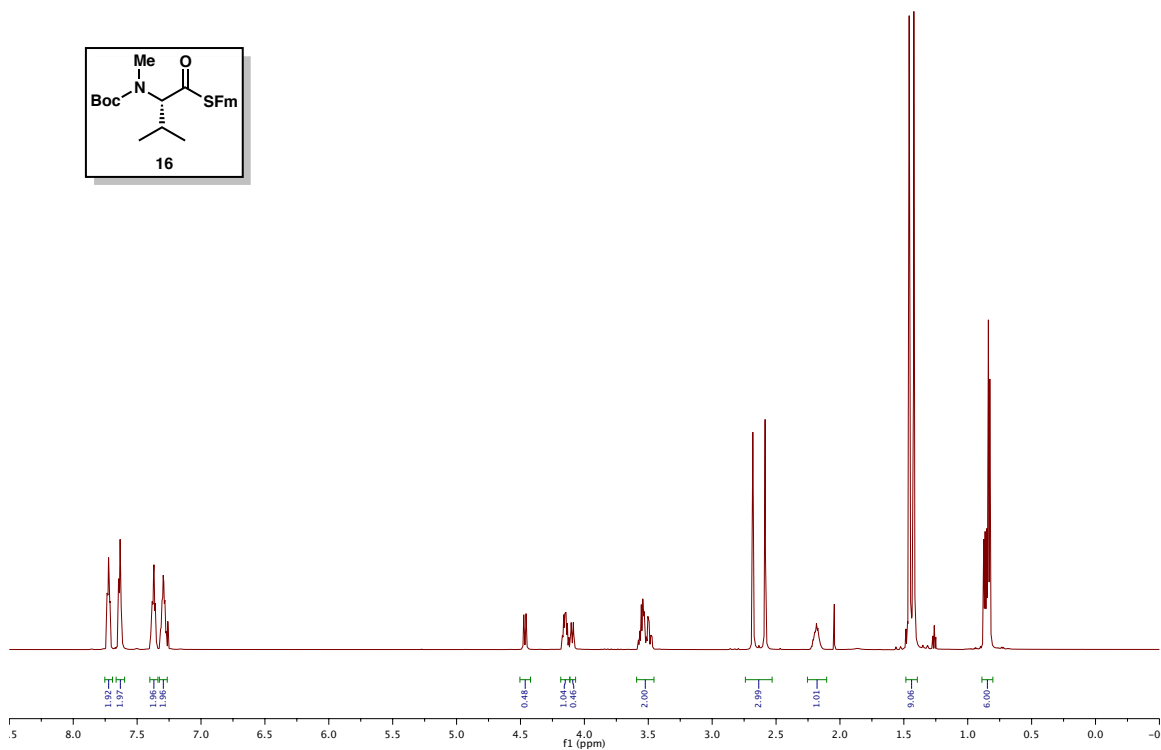

<sup>1</sup>H NMR Spectrum of **Boc-MeVal-SFm (16)** in CDCl<sub>3</sub> at 600 MHz.

xw-ev-17C13  
group Danishefsky  
\* wux1 xw-ev-17C13 (10 1) CDCl3 24.0C April\_27,2011\_10:55:14 Bruker AVIII 600MHz RRL1326: janggeum zgpg30 : 13C 110.000 ppm; 1H 4.500 ppm \*.  
\_CarbonBC CDCl3 /opt/users/wux1 wux1 10

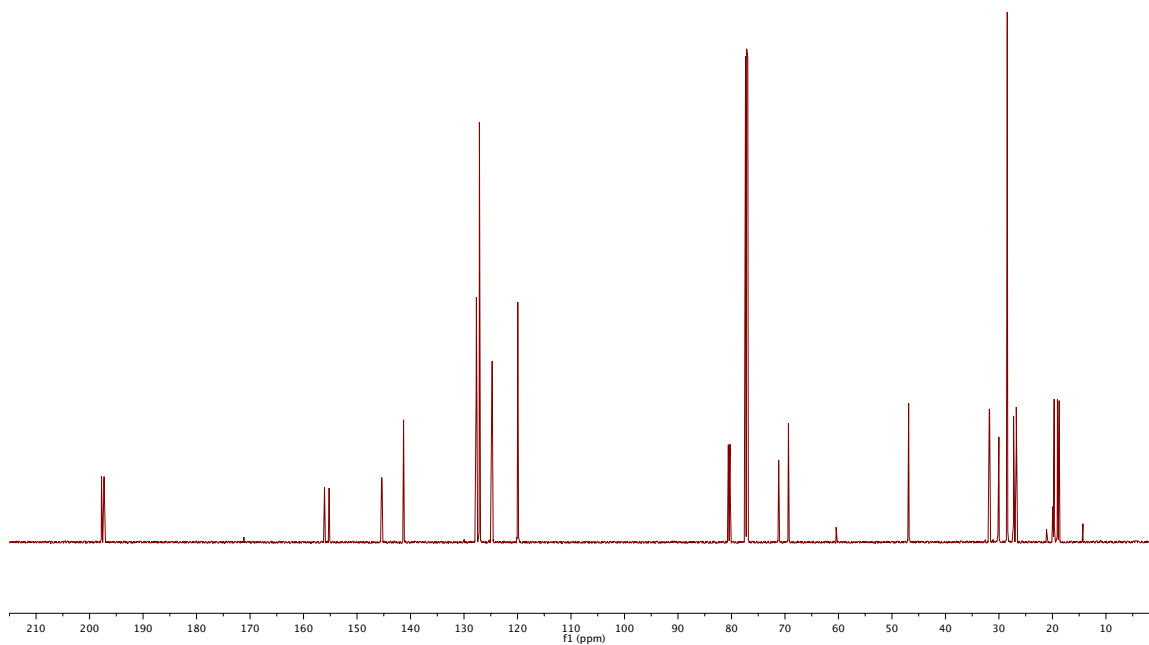

<sup>13</sup>C NMR Spectrum of **Boc-MeVal-SFm (16)** in CDCl<sub>3</sub> at 151 MHz.

xw-ev-23H/20  
 group Danishefsky  
 \* wux1 xw-ev-23H (20 1) CDCl3 24.0C July\_22,2011\_14:33:34 Bruker AVIII 600MHz RRL1326: janggeum zg30 : 1H 7.500 ppm \*.  
 \_ProtonBC CDCl3 /opt/users/wux1 wux1 15

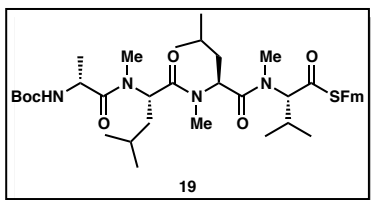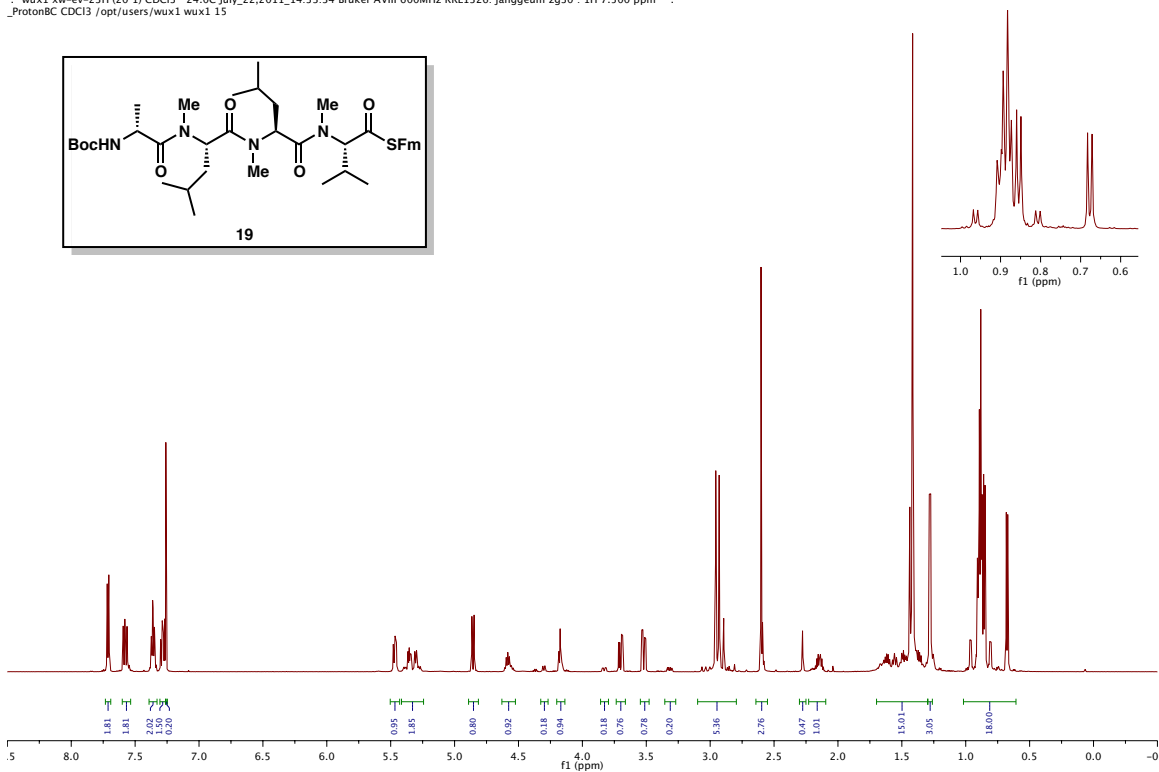

xw-ev-22/23  
 group Danishefsky  
 \* stockdij xw-ev-22 (23 1) CDCl3 54.0C October\_17,2011\_18:58:56 Bruker AVIII 600MHz RRL1326: janggeum zg30 : 1H 7.500 ppm \*.  
 \_Proton\_VT CDCl3 /opt/users/stockdij stockdij 18 4

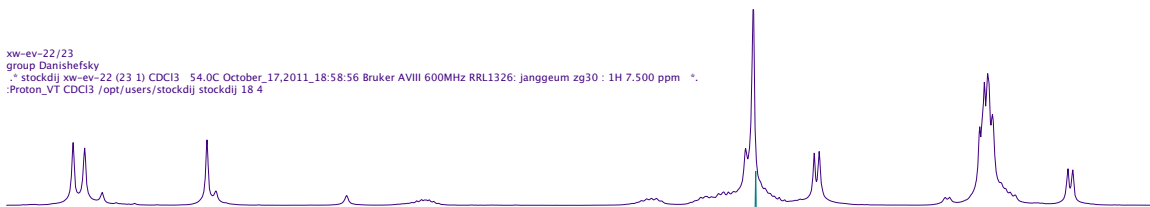

xw-ev-22/22  
 group Danishefsky  
 \* stockdij xw-ev-22 (22 1) CDCl3 44.0C October\_17,2011\_18:47:09 Bruker AVIII 600MHz RRL1326: janggeum zg30 : 1H 7.500 ppm \*.  
 \_Proton\_VT CDCl3 /opt/users/stockdij stockdij 18 3

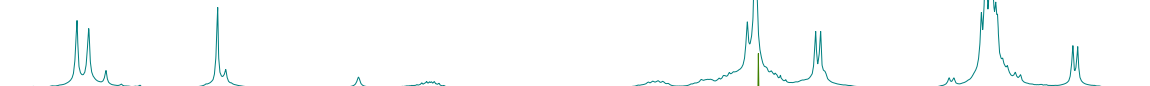

xw-ev-22/21  
 group Danishefsky  
 \* stockdij xw-ev-22 (21 1) CDCl3 34.0C October\_17,2011\_18:36:31 Bruker AVIII 600MHz RRL1326: janggeum zg30 : 1H 7.500 ppm \*.  
 \_Proton\_VT CDCl3 /opt/users/stockdij stockdij 18 2

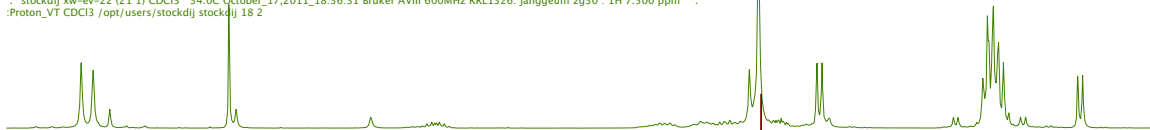

xw-ev-22/20  
 group Danishefsky  
 \* stockdij xw-ev-22 (20 1) CDCl3 24.0C October\_17,2011\_18:27:23 Bruker AVIII 600MHz RRL1326: janggeum zg30 : 1H 7.500 ppm \*.  
 \_Proton\_VT CDCl3 /opt/users/stockdij stockdij 18 1

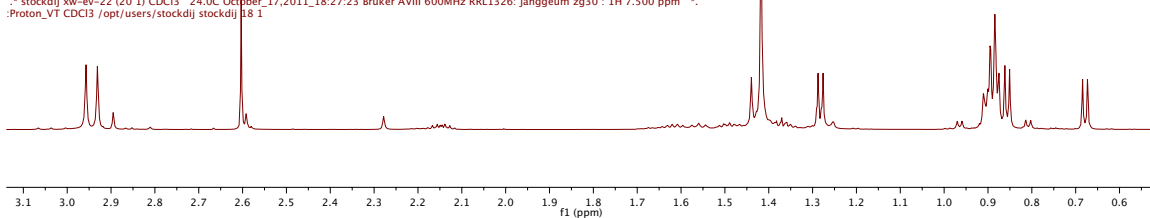

Variable Temperature <sup>1</sup>H NMR Spectrum of **Boc-D-Ala-MeLeu-MeLeu-MeVal-SFm (19)** in CDCl<sub>3</sub> at 600 MHz.



xw-ev-23C13/10  
group Danishefsky  
= wux1 xw-ev-23C13 (10 1) CDCl3 24.0C July\_21\_2011\_15:16:45 Bruker AVIII 600MHz RRL1326; janggeum zgpg30 : 13C 110.000 ppm; 1H 4.500 ppm  
\_Carbon8C CDCl3 /opt/users/wux1 wux1 40

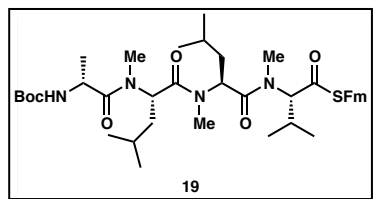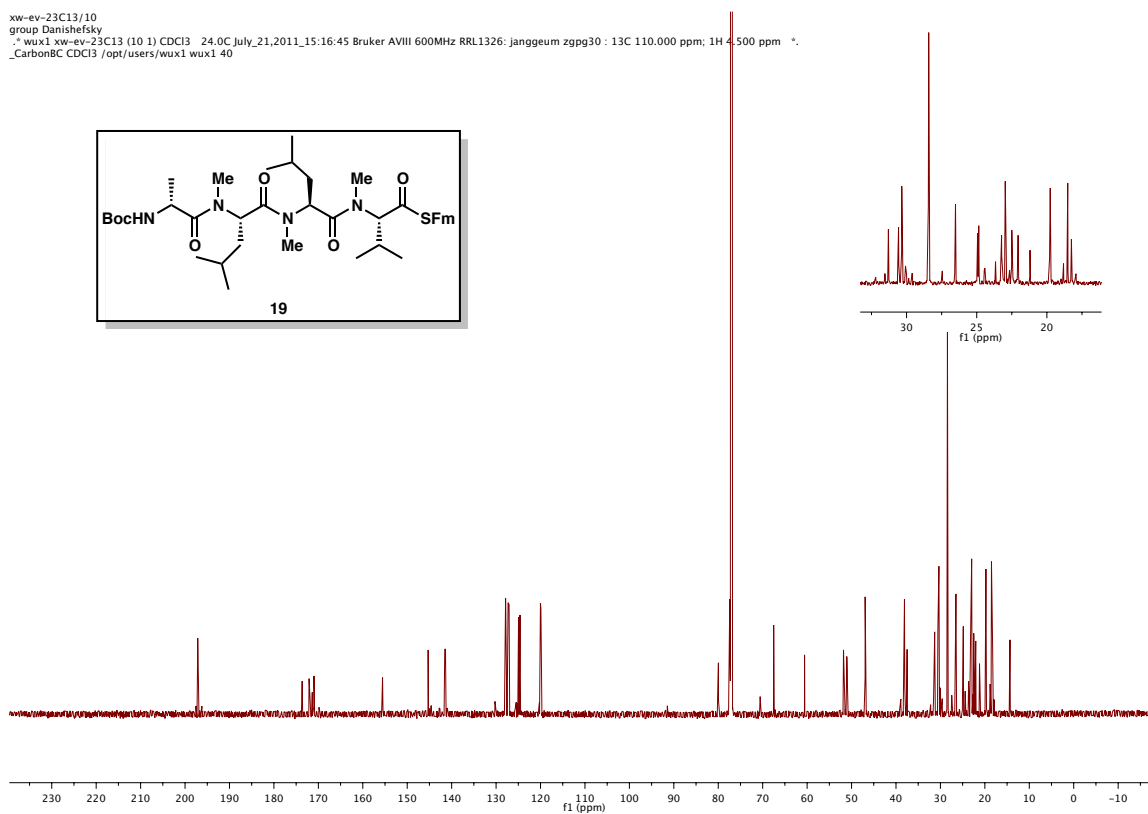

$^{13}\text{C}$  NMR Spectrum of **Boc-D-Ala-MeLeu-MeLeu-MeVal-SFm (19)** in  $\text{CDCl}_3$  at 151 MHz.

xw-c2-2H/20  
 group Danishefsky  
 \* wux1 xw-c2-2H (20 1) CDCl3 24.0C July\_01\_2011\_23:21:27 Bruker AVIII 600MHz RRL1326: janggeum zg30 : 1H 7.500 ppm \*.  
 \_ProtonBC CDCl3 /opt/users/wux1 wux1 40

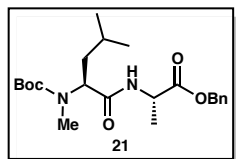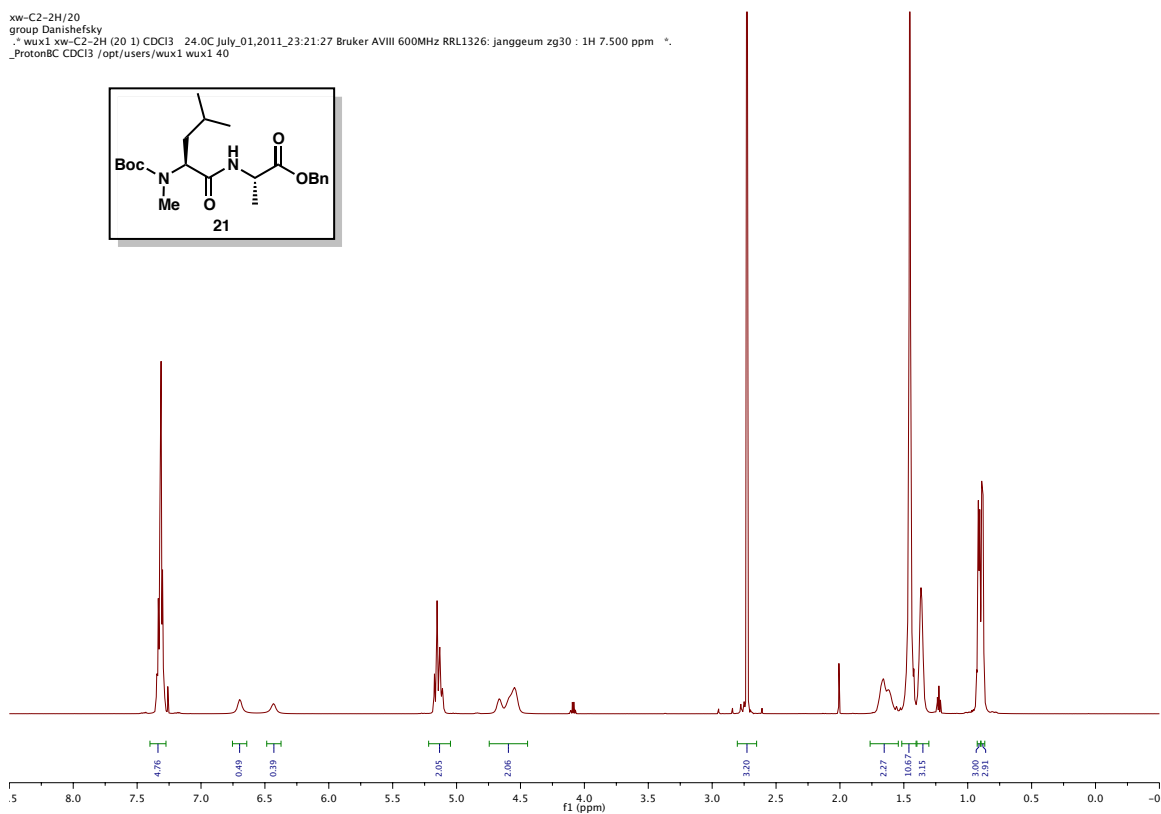

<sup>1</sup>H NMR Spectrum of Boc-MeLeu-Ala-OBn (**21**) in CDCl<sub>3</sub> at 600 MHz.

xw-c-2/14  
 group Danishefsky  
 \* stockdij xw-c-2 (14 1) CDCl3 54.0C October\_17\_2011\_19:56:16 Bruker AVIII 600MHz RRL1326: janggeum zg30 : 1H 7.500 ppm \*.  
 \_Proton\_VT CDCl3 /opt/users/stockdij stockdij 19 4

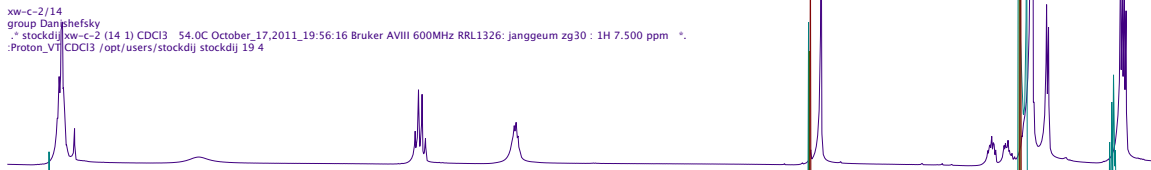

xw-c-2/13  
 group Danishefsky  
 \* stockdij xw-c-2 (13 1) CDCl3 44.0C October\_17\_2011\_19:42:40 Bruker AVIII 600MHz RRL1326: janggeum zg30 : 1H 7.500 ppm \*.  
 \_Proton\_VT CDCl3 /opt/users/stockdij stockdij 19 3

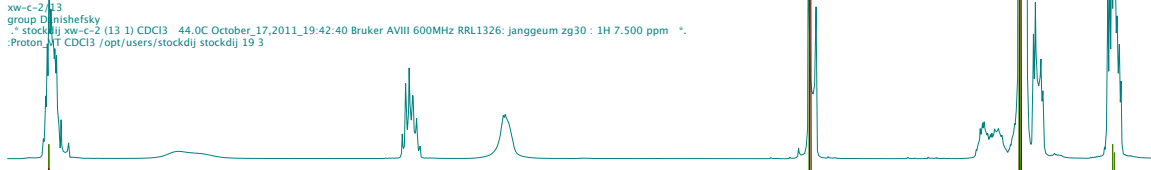

xw-c-2/12  
 group Danishefsky  
 \* stockdij xw-c-2 (12 1) CDCl3 34.0C October\_17\_2011\_19:32:40 Bruker AVIII 600MHz RRL1326: janggeum zg30 : 1H 7.500 ppm \*.  
 \_Proton\_VT CDCl3 /opt/users/stockdij stockdij 19 2

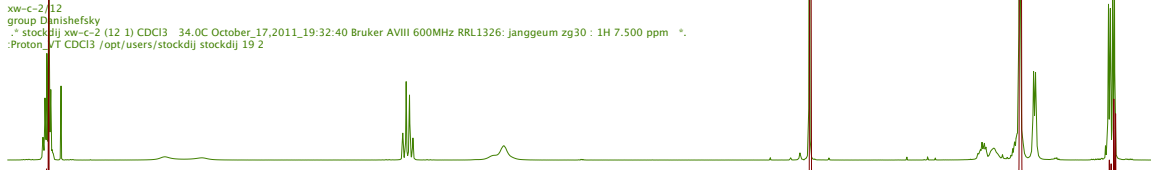

xw-c-2/11  
 group Danishefsky  
 \* stockdij xw-c-2 (11 1) CDCl3 24.0C October\_17\_2011\_19:23:20 Bruker AVIII 600MHz RRL1326: janggeum zg30 : 1H 7.500 ppm \*.  
 \_Proton\_VT CDCl3 /opt/users/stockdij stockdij 19 1

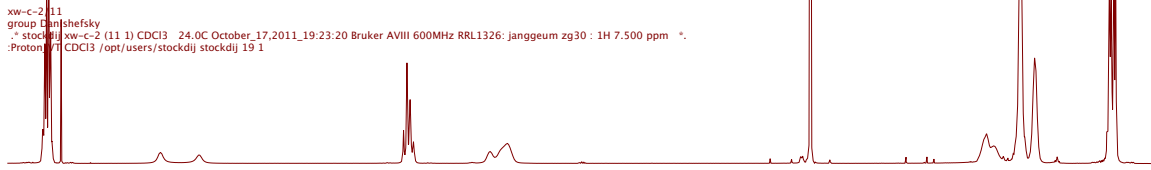

Variable Temperature <sup>1</sup>H NMR Spectrum of Boc-MeLeu-Ala-OBn (**21**) in CDCl<sub>3</sub> at 600 MHz.

xw-C2-2C13/20  
group Danishefsky  
\* wux1 xw-C2-2C13 (20 1) CDCl3 24.0C July\_01.2011\_23:24:02 Bruker AVIII 600MHz RRL1326: jängeum zpgg30 : 13C 110.000 ppm 1H 4.500 ppm \*  
\_Carbon8C CDCl3 /opt/users/wux1 wux1.40

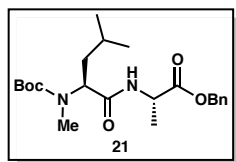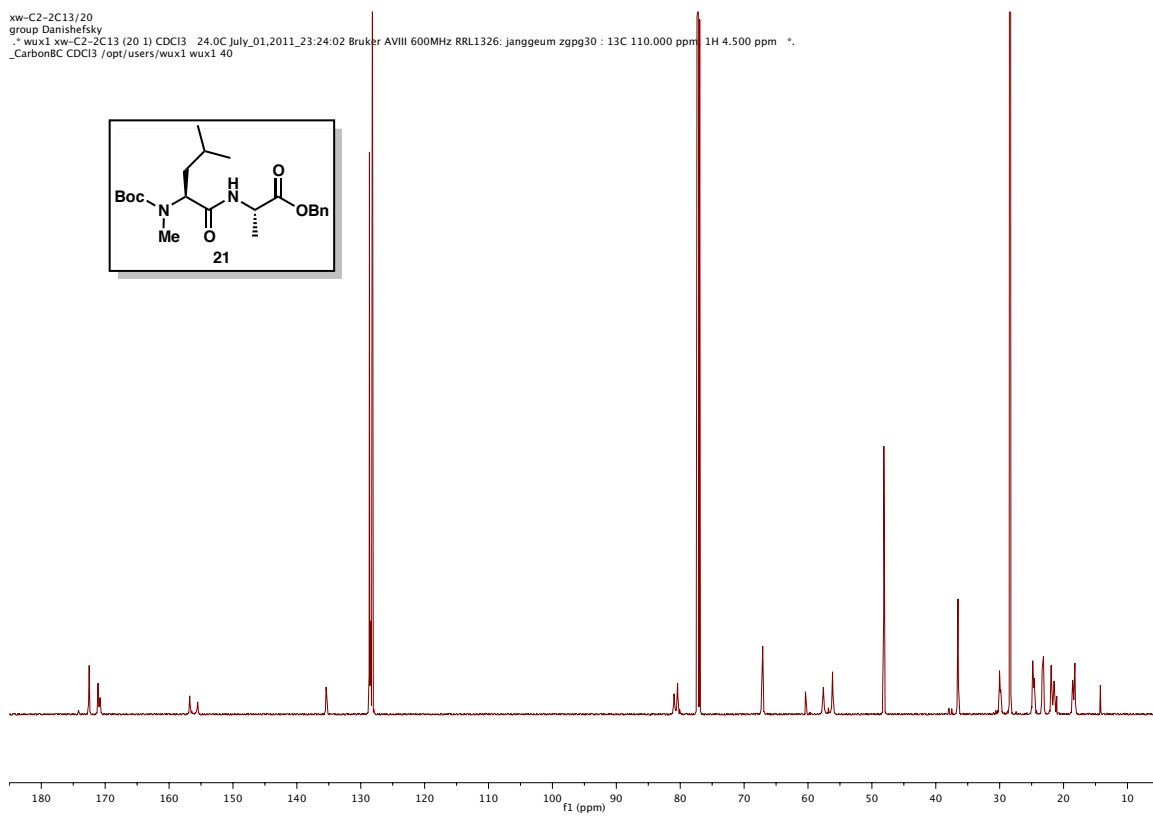

<sup>13</sup>C NMR Spectrum of Boc-MeLeu-Ala-OBn (21) in CDCl<sub>3</sub> at 151 MHz.

xw-c2-3H/10  
 group Danishefsky  
 \* wux1 xw-c2-3H (10 1) CDCl3 24.0C July\_03,2011\_17:34:36 Bruker AVIII 600MHz RRL1326: janggeum zg30 : 1H 7.500 ppm \*.  
 \_ProtonBC CDCl3 /opt/users/wux1 wux1 20

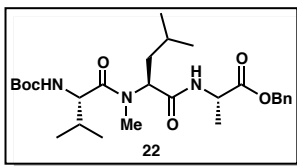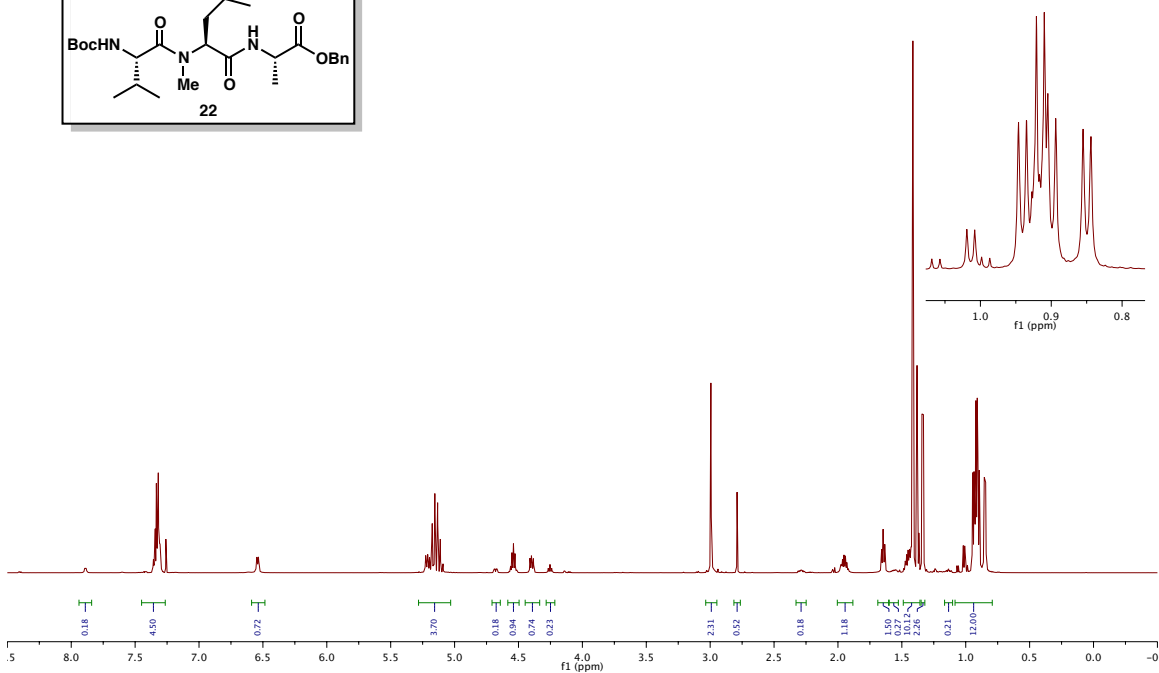

$^1\text{H}$  NMR Spectrum of **Boc-Val-MeLeu-Ala-OBn (22)** in  $\text{CDCl}_3$  at 600 MHz.

xw-c-3/14  
 group Danishefsky  
 \* stockdij xw-c-3 (14 1) CDCl3 54.0C October\_17,2011\_20:53:21 Bruker AVIII 600MHz RRL1326: janggeum zg30 : 1H 7.500 ppm \*.  
 \_Proton\_VT CDCl3 /opt/users/stockdij stockdij 20 4

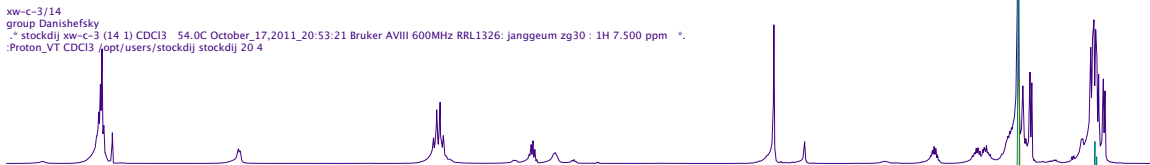

xw-c-3/13  
 group Danishefsky  
 \* stockdij xw-c-3 (13 1) CDCl3 44.0C October\_17,2011\_20:40:53 Bruker AVIII 600MHz RRL1326: janggeum zg30 : 1H 7.500 ppm \*.  
 \_Proton\_VT CDCl3 /opt/users/stockdij stockdij 20 3

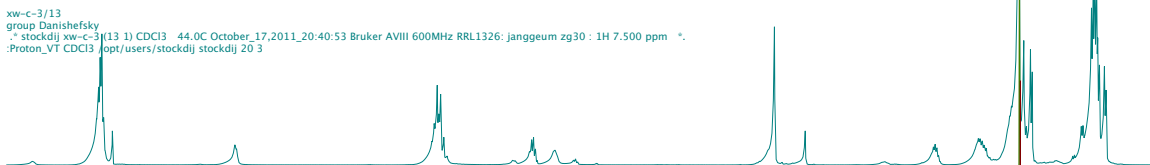

xw-c-3/12  
 group Danishefsky  
 \* stockdij xw-c-3 (12 1) CDCl3 34.0C October\_17,2011\_20:30:35 Bruker AVIII 600MHz RRL1326: janggeum zg30 : 1H 7.500 ppm \*.  
 \_Proton\_VT CDCl3 /opt/users/stockdij stockdij 20 2

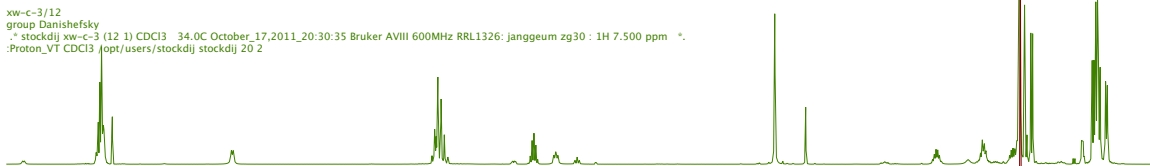

xw-c-3/11  
 group Danishefsky  
 \* stockdij xw-c-3 (11 1) CDCl3 24.0C October\_17,2011\_20:20:43 Bruker AVIII 600MHz RRL1326: janggeum zg30 : 1H 7.500 ppm \*.  
 \_Proton\_VT CDCl3 /opt/users/stockdij stockdij 20 1

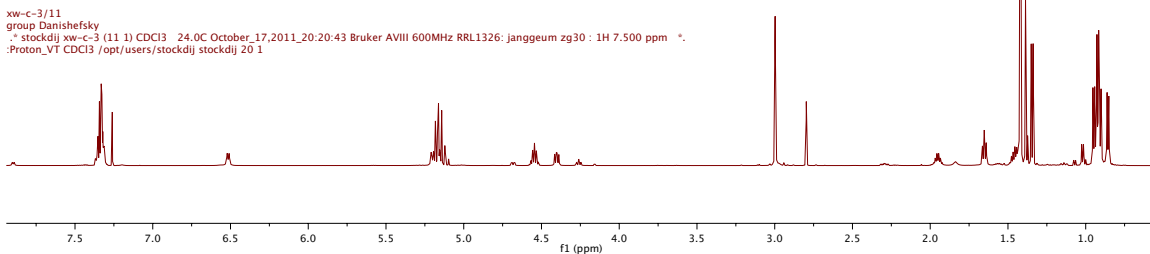

Variable Temperature  $^1\text{H}$  NMR Spectrum of **Boc-Val-MeLeu-Ala-OBn (22)** in  $\text{CDCl}_3$  at 600 MHz.

xw-C2-3C13/10  
group Danishefsky  
.\* wux1 xw-C2-3C13 (10 1) CDCl3 24.0C July\_03,2011\_17:37:11 Bruker AVIII 600MHz RRL1326: janggeum zpgp30 : 13C 110.000 ppm; 1H 4.500 ppm \*.  
\_CarbonBC CDCl3 /opt/users/wux1 wux1 20

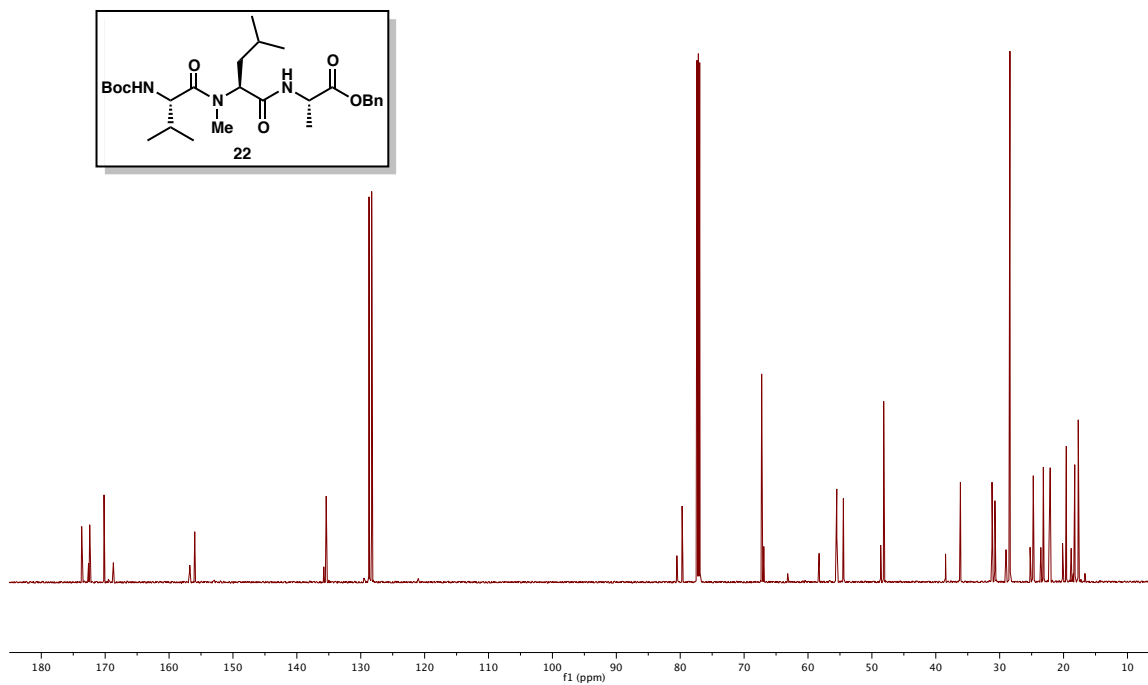

<sup>13</sup>C NMR Spectrum of **Boc-Val-MeLeu-Ala-OBn (22)** in CDCl<sub>3</sub> at 151 MHz.

xw-C2-4H/10  
 group Danishefsky  
 \* wux1 xw-C2-4H (10 1) CDCl3 24.0C July\_04,2011\_22:46:44 Bruker AVIII 600MHz RRL1326: janggeum zg30 : 1H 7.500 ppm \*  
 \_ProtonBC CDCl3 /opt/users/wux1 wux1 40

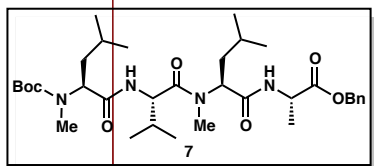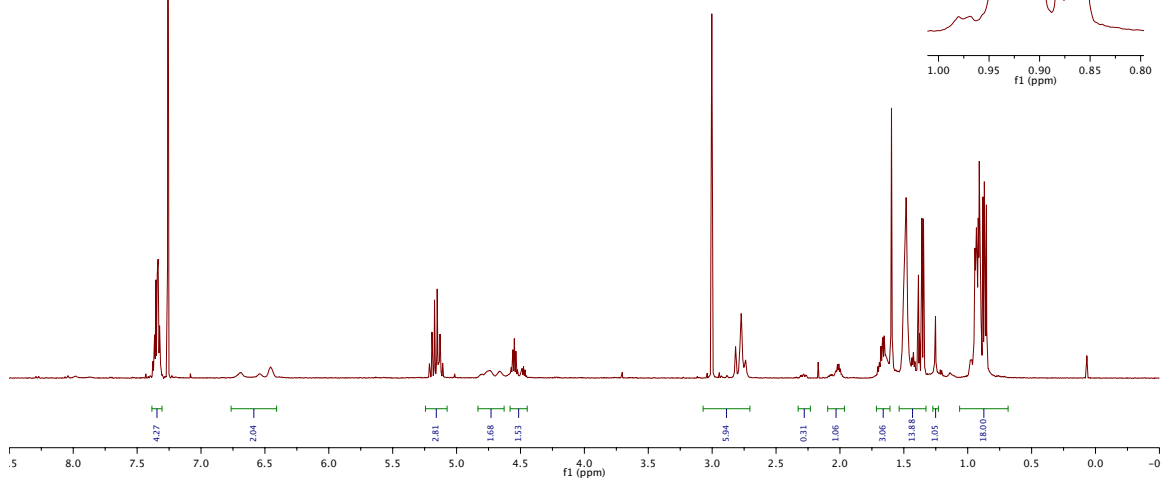

<sup>1</sup>H NMR Spectrum of Boc-MeLeu-Val-MeLeu-Ala-OBn (7) in CDCl<sub>3</sub> at 600 MHz.

xw-C2-4C13a/10  
 group Danishefsky  
 \* wux1 xw-C2-4C13a (10 1) CDCl3 24.0C October\_20,2011\_12:02:51 Bruker AVIII 600MHz RRL1326: janggeum zgpg30 : 13C 110.000 ppm; 1H 4.500 ppm \*  
 \_CarbonBC CDCl3 /opt/users/wux1 wux1 40

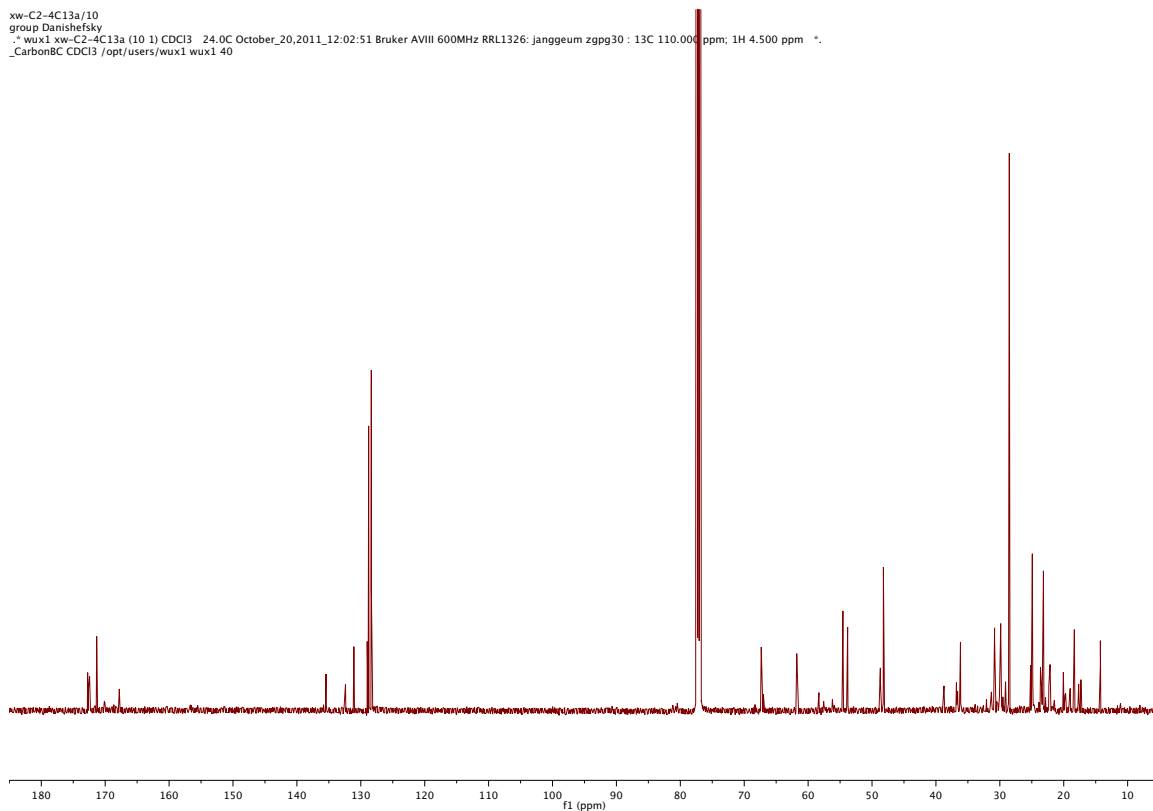

<sup>13</sup>C NMR Spectrum of Boc-MeLeu-Val-MeLeu-Ala-OBn (7) in CDCl<sub>3</sub> at 151 MHz.

xw-c2-5h/10  
 group Danishefsky  
 \* wux1 xw-c2-5h (10 1) CDCl3 24.0C August\_01\_2011\_10:56:32 Bruker AVIII 600MHz RRL1326: janggeum zg30 : 1H 7.500 ppm \*.  
 ;ProtonBC CDCl3 /opt/users/wux1 wux1 20

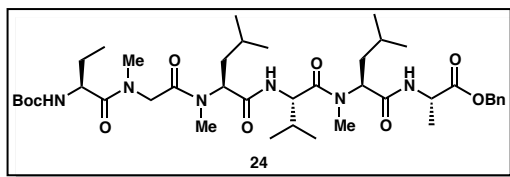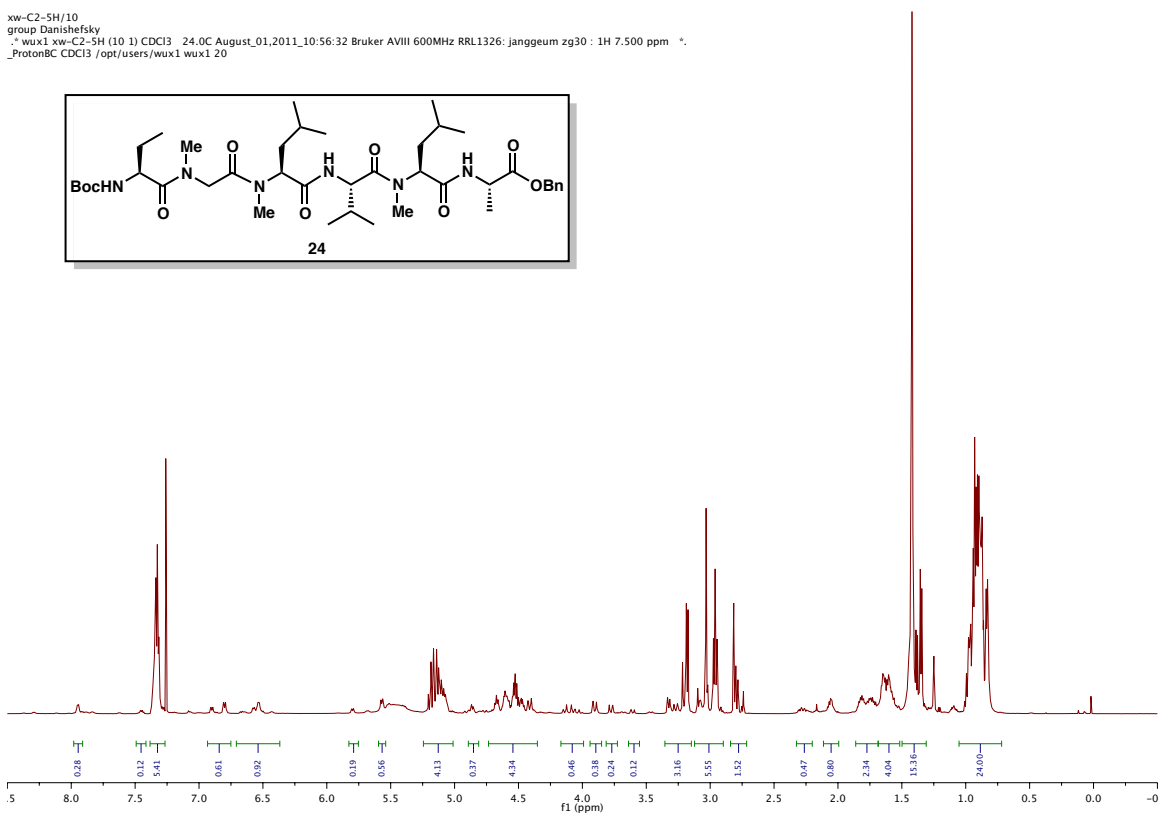

<sup>1</sup>H NMR Spectrum of **Boc-Abu-Sar-MeLeu-Val-MeLeu-Ala-OBn (24)** in CDCl<sub>3</sub> at 600 MHz.

xw-c-5/13  
 group Danishefsky  
 \* stockdij xw-c-5 (13 1) CDCl3 54.0C October\_17\_2011\_21:48:51 Bruker AVIII 600MHz RRL1326: janggeum zg30 : 1H 7.500 ppm \*.  
 ;Proton\_VT CDCl3 /opt/users/stockdij stockdij 21 4

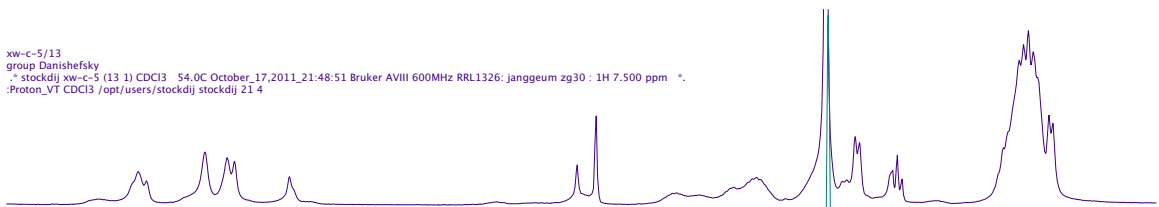

xw-c-5/12  
 group Danishefsky  
 \* stockdij xw-c-5 (12 1) CDCl3 44.0C October\_17\_2011\_21:35:32 Bruker AVIII 600MHz RRL1326: janggeum zg30 : 1H 7.500 ppm \*.  
 ;Proton\_VT CDCl3 /opt/users/stockdij stockdij 21 3

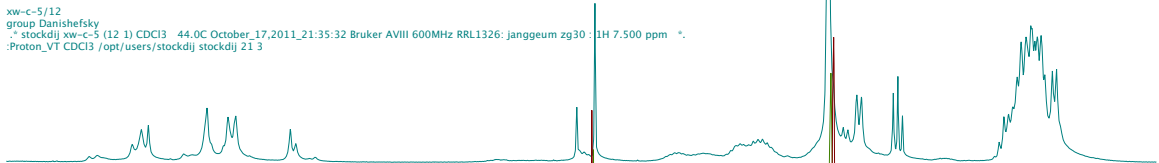

xw-c-5/11  
 group Danishefsky  
 \* stockdij xw-c-5 (11 1) CDCl3 34.0C October\_17\_2011\_21:25:27 Bruker AVIII 600MHz RRL1326: janggeum zg30 : 1H 7.500 ppm \*.  
 ;Proton\_VT CDCl3 /opt/users/stockdij stockdij 21 2

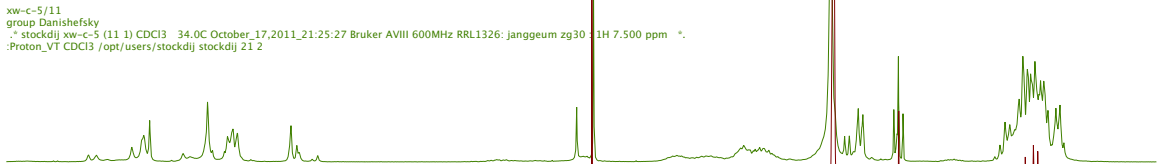

xw-c-5/10  
 group Danishefsky  
 \* stockdij xw-c-5 (10 1) CDCl3 24.0C October\_17\_2011\_21:15:58 Bruker AVIII 600MHz RRL1326: janggeum zg30 : 1H 7.500 ppm \*.  
 ;Proton\_VT CDCl3 /opt/users/stockdij stockdij 21 1

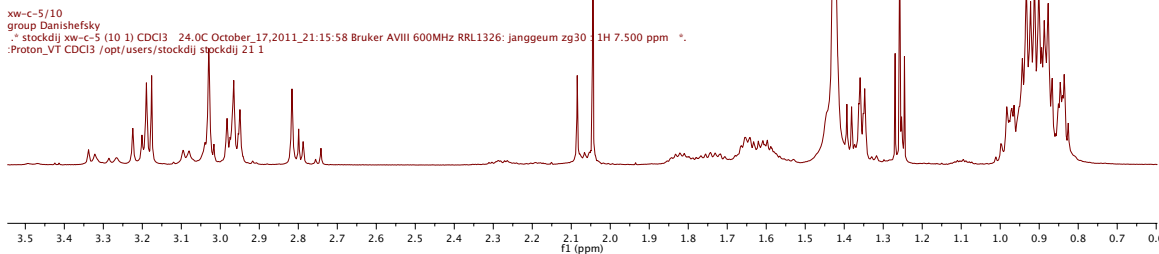

Variable Temperature <sup>1</sup>H NMR Spectrum of **Boc-Abu-Sar-MeLeu-Val-MeLeu-Ala-OBn (24)** in CDCl<sub>3</sub> at 600 MHz.

xw-C2-5C13/10  
group Danishefsky  
.\* wux1 xw-C2-5C13 (10 1) CDCl3 24.0C August\_01,2011\_11:00:30 Bruker AVIII 600MHz RRL1326: janggeum zpg30 : 13C 110.000 ppm; 1H 4.500 ppm \*.  
\_CarbonBC CDCl3 /opt/users/wux1 wux1 20

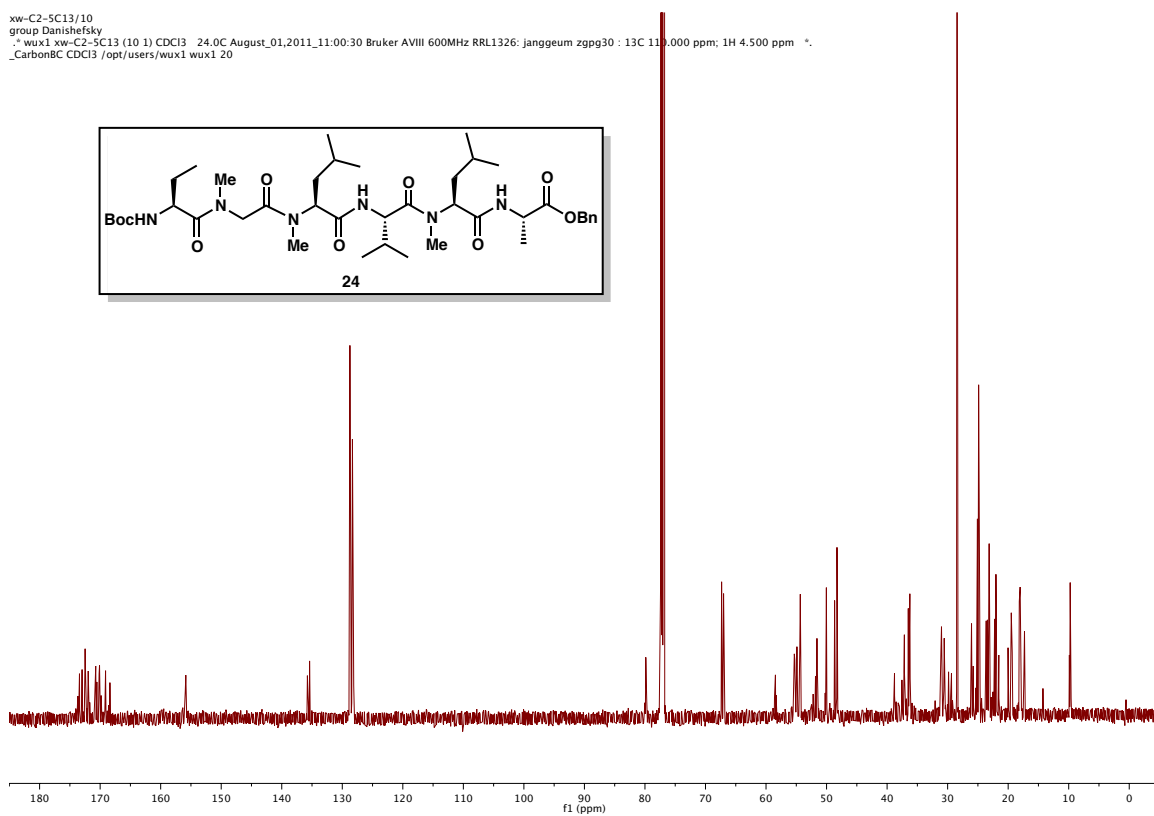

<sup>13</sup>C NMR Spectrum of **Boc-Abu-Sar-MeLeu-Val-MeLeu-Ala-OBn (24)** in CDCl<sub>3</sub> at 600 MHz.



xw-ev-13H/10  
 group Danishefsky  
 \* wux1 xw-ev-13H (10 1) CDCl3 24.0C July\_13,2011\_17:32:50 Bruker AVIII 600MHz RRL1326: janggeum zg30 : 1H 7.500 ppm \*.  
 ;ProtonBC CDCl3 /opt/users/wux1 wux1 40

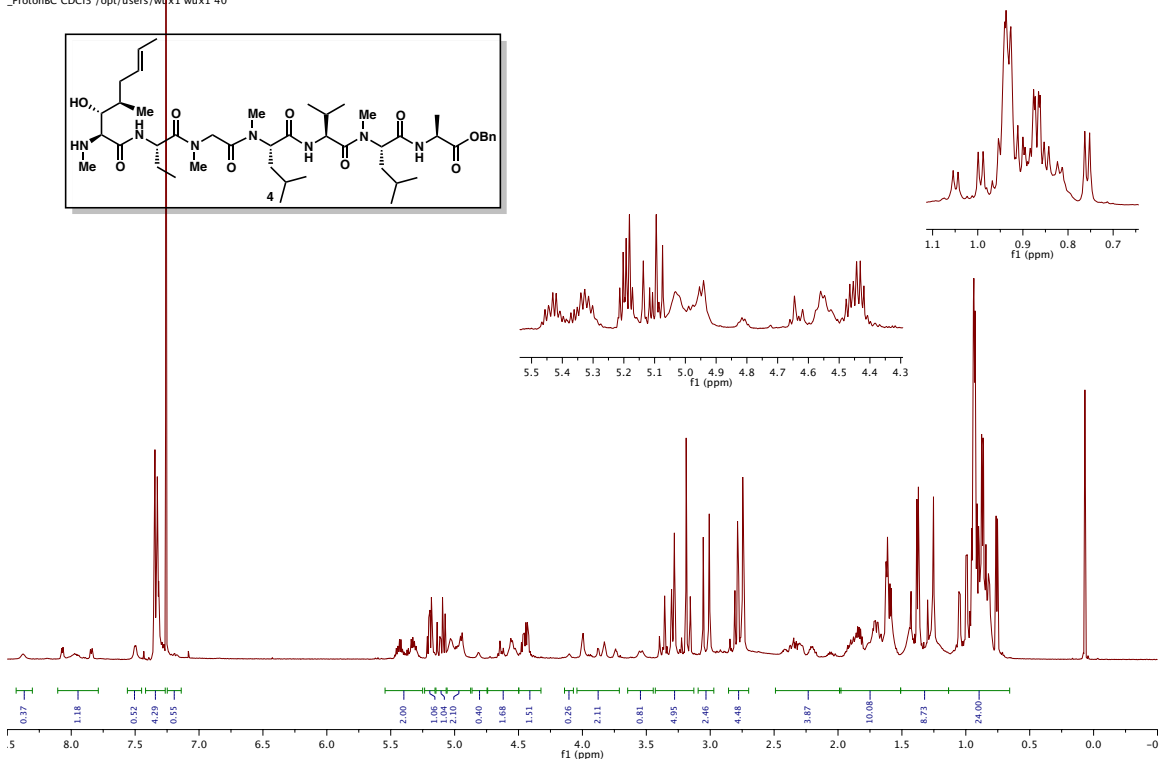

<sup>1</sup>H NMR Spectrum of **H-MeBmt-Abu-Sar-MeLeu-Val-MeLeu-Ala-OBn (4)** in CDCl<sub>3</sub> at 600 MHz.

xw-ev-13/13  
 group Danishefsky  
 \* stockdij xw-ev-13 (13 1) CDCl3 54.0C October\_17,2011\_22:51:47 Bruker AVIII 600MHz RRL1326: janggeum zg30 : 1H 7.500 ppm \*.  
 ;Proton\_VT CDCl3 /opt/users/stockdij stockdij 22 4

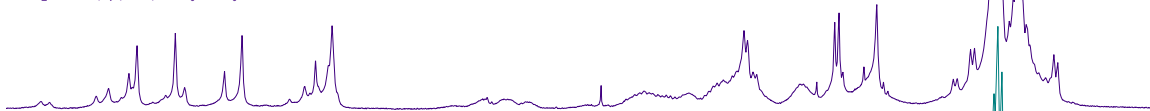

xw-ev-13/12  
 group Danishefsky  
 \* stockdij xw-ev-13 (12 1) CDCl3 44.0C October\_17,2011\_22:34:13 Bruker AVIII 600MHz RRL1326: janggeum zg30 : 1H 7.500 ppm \*.  
 ;Proton\_VT CDCl3 /opt/users/stockdij stockdij 22 3

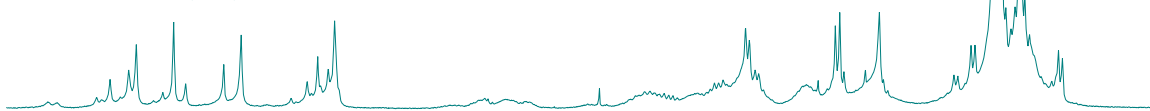

xw-ev-13/11  
 group Danishefsky  
 \* stockdij xw-ev-13 (11 1) CDCl3 34.0C October\_17,2011\_22:23:54 Bruker AVIII 600MHz RRL1326: janggeum zg30 : 1H 7.500 ppm \*.  
 ;Proton\_VT CDCl3 /opt/users/stockdij stockdij 22 2

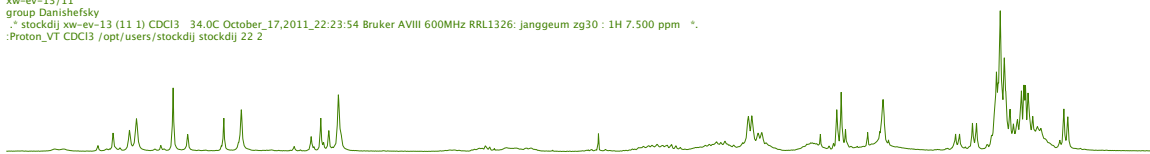

xw-ev-13/10  
 group Danishefsky  
 \* stockdij xw-ev-13 (10 1) CDCl3 24.0C October\_17,2011\_22:14:26 Bruker AVIII 600MHz RRL1326: janggeum zg30 : 1H 7.500 ppm \*.  
 ;Proton\_VT CDCl3 /opt/users/stockdij stockdij 22 1

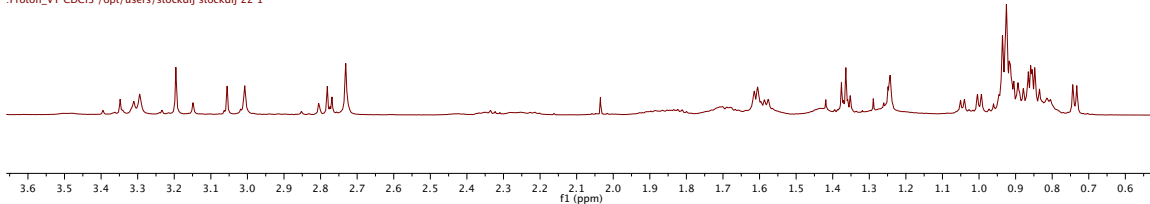

Variable Temperature <sup>1</sup>H NMR Spectrum of **H-MeBmt-Abu-Sar-MeLeu-Val-MeLeu-Ala-OBn (4)** in CDCl<sub>3</sub> at 600 MHz.

xw-ev-13C13/10  
 group Danishefsky  
 \* wux1 xw-ev-13C13 (10 1) CDCl3 24.0C July\_13,2011\_17:41:01 Bruker AVIII 600MHz RRL1326: janggeum zgpg30 : 13C 110.000 ppm; 1H 4.500 ppm  
 \_CarbonBC CDCl3 /opt/users/wux1 wux1 40

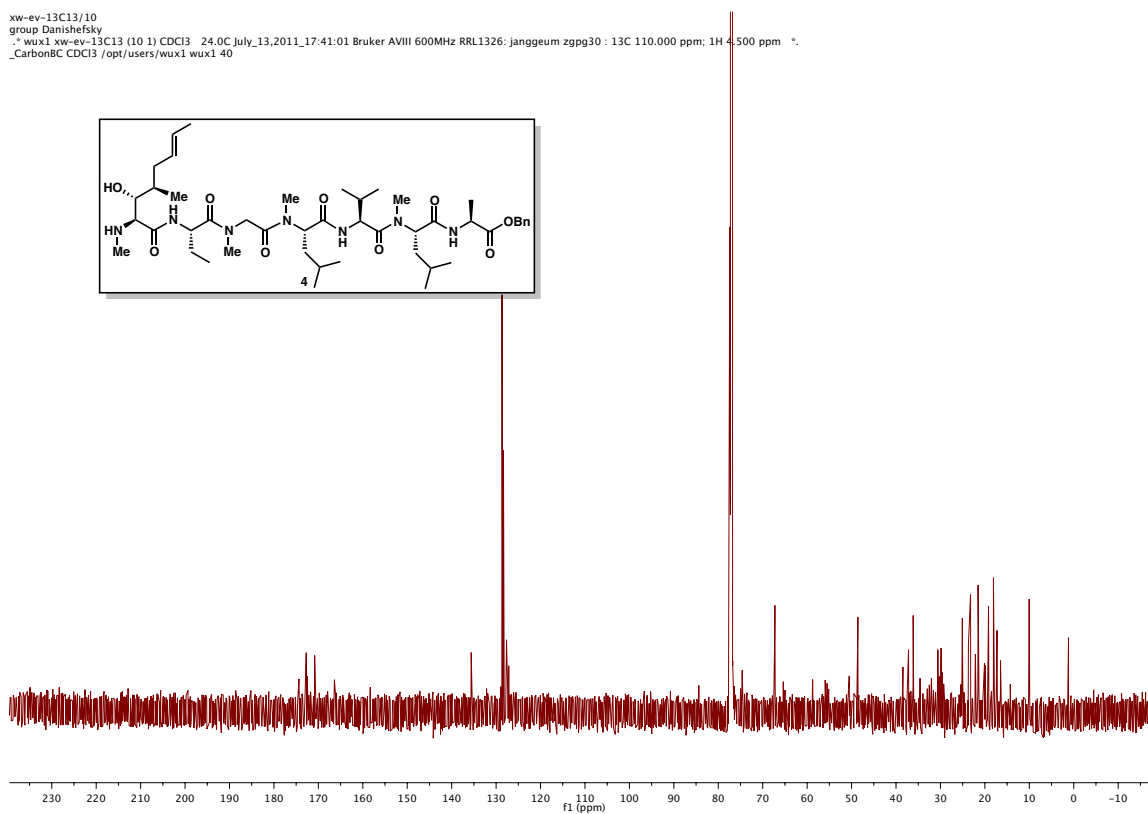

$^{13}\text{C}$  NMR Spectrum of **H-MeBmt-Abu-Sar-MeLeu-Val-MeLeu-Ala-OBn (4)** in  $\text{CDCl}_3$  at 151 MHz (dilute).

xw-ev-14b-H-Rd/10  
 group Danishefsky  
 \* wux1 xw-ev-14b-H (10 1) CDCl3 24.0C July\_12,2011\_21:54:40 Bruker AVIII 600MHz RRL1326: janggeum zg30 : 1H 7.500 ppm  
 \_ProtonBC CDCl3 /opt/users/wux1 wux1 40

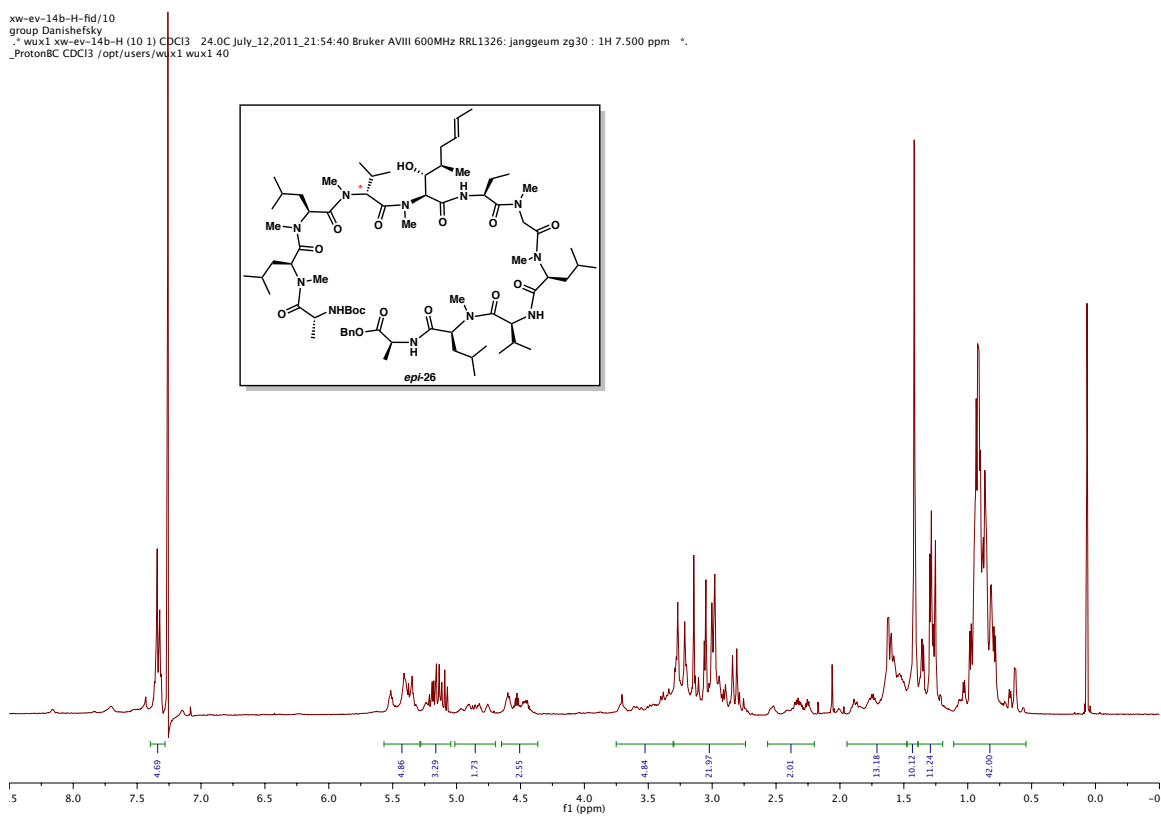

$^1\text{H}$  NMR Spectrum of **Boc-D-Ala-MeLeu-MeLeu-D-MeVal-MeBmt-Abu-Sar-MeLeu-Val-MeLeu-Ala-OBn (epi-26)** in  $\text{CDCl}_3$  at 600 MHz.

xw-ev-14H/10  
 group Danishefsky  
 = wux1 xw-ev-14H (10 1) CDCl3 24.0C July\_11,2011\_18:42:10 Bruker AVIII 600MHz RRL1326; janggeum zg30 : 1H 7.500 ppm  
 \_ProtonBC CDCl3 /opt/users/wux1 wux1 30

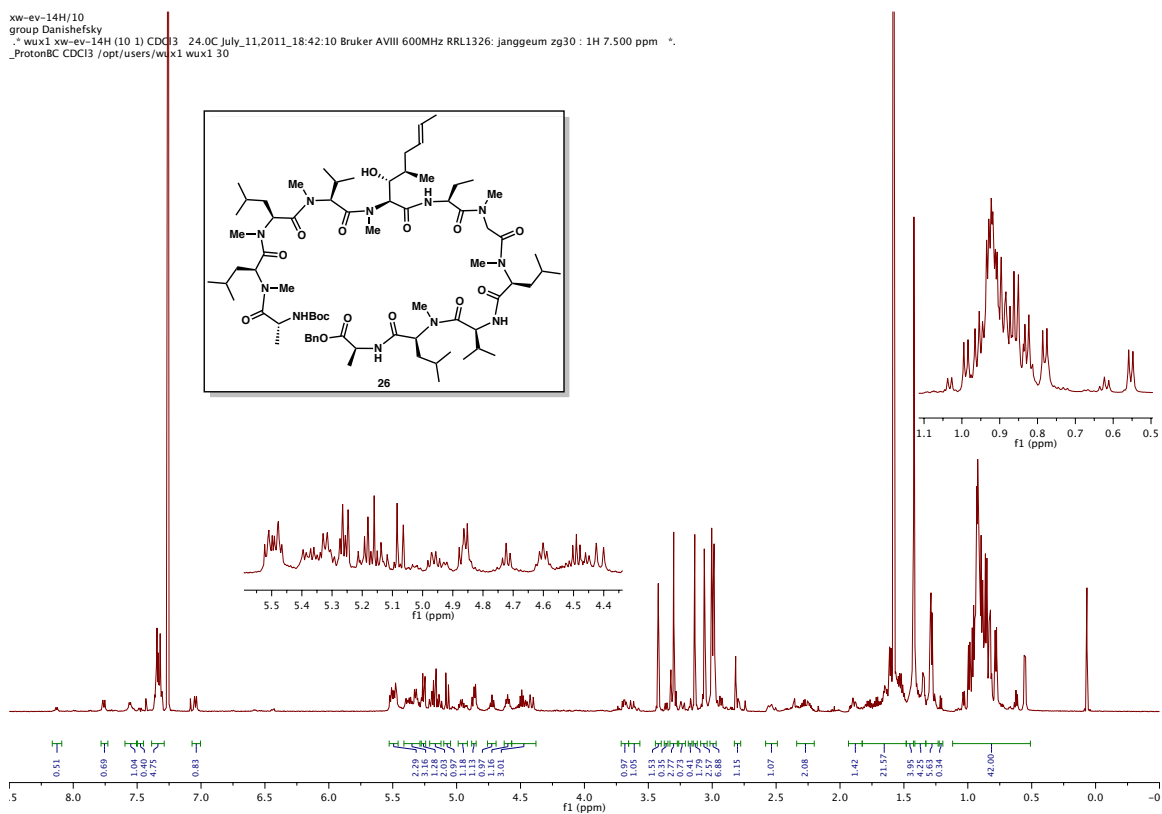

xw-ev-14C13/10  
 group Danishefsky  
 = wux1 xw-ev-14C13 (10 1) CDCl3 24.0C July\_11,2011\_18:57:21 Bruker AVIII 600MHz RRL1326; janggeum zgpg30 : 13C 110.000 ppm; 1H 4.500 ppm  
 \_CarbonBC CDCl3 /opt/users/wux1 wux1 30

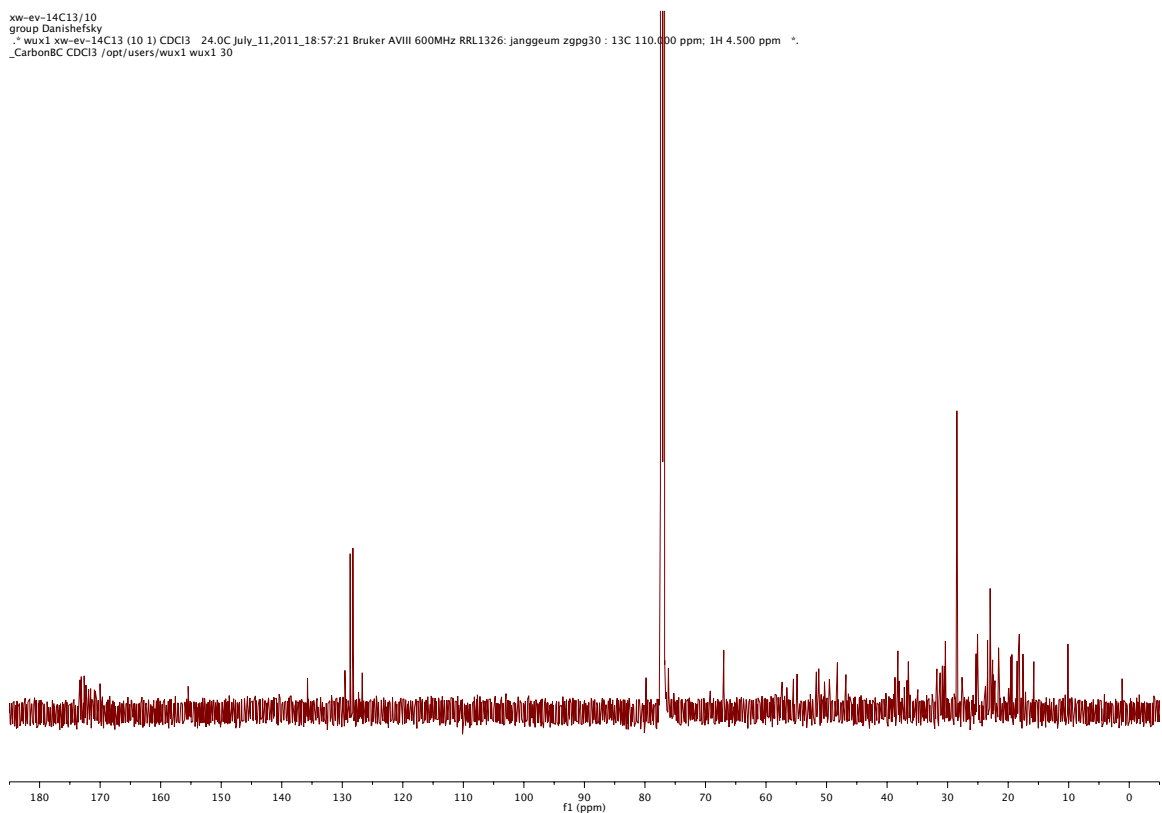

xw-ev-27H/10  
 group Danishefsky  
 = wux1 xw-ev-27H (10 1) CDCl3 24.0C July\_15,2011\_22:51:44 Bruker AVIII 600MHz RRL1326; janggeum zg30 : 1H 7.500 ppm \*.  
 \_ProtonBC CDCl3 /opt/users/wux1 wux1 10

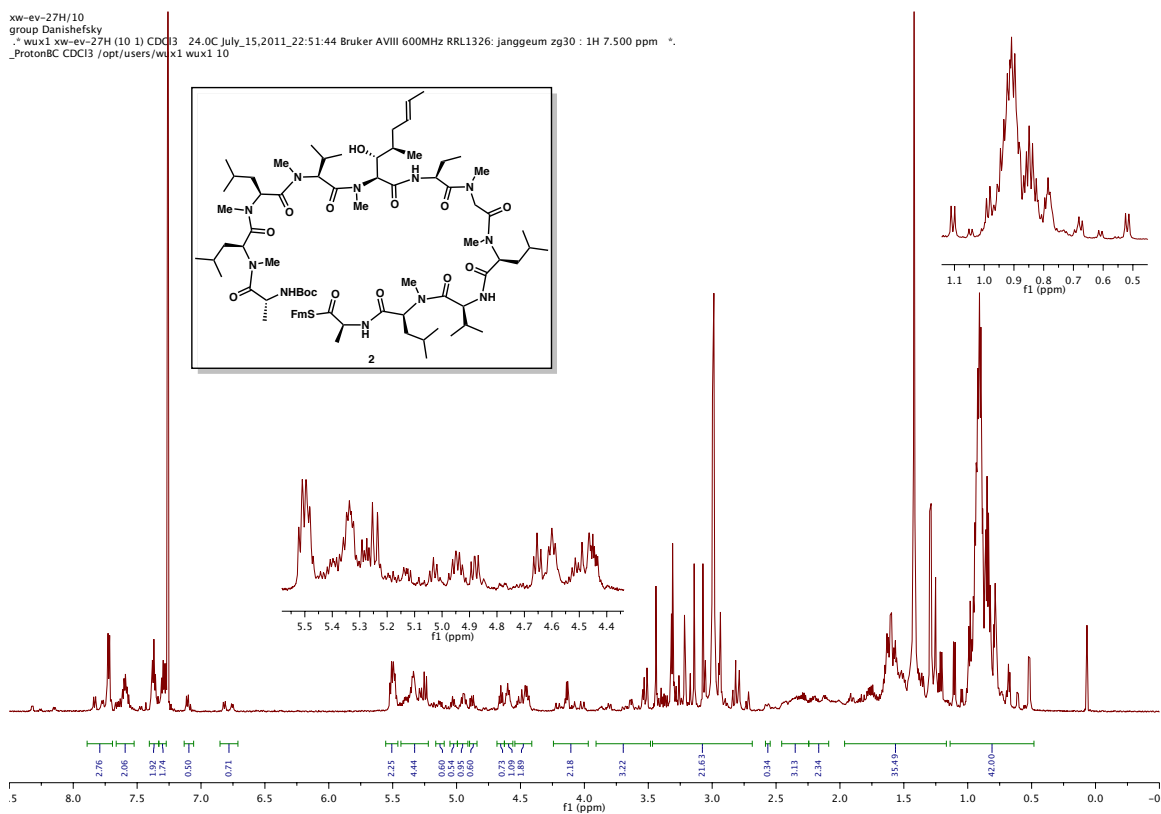

xw-ev-27C13/10  
 group Danishefsky  
 = wux1 xw-ev-27C13 (10 1) CDCl3 24.0C July\_15,2011\_22:54:21 Bruker AVIII 600MHz RRL1326; janggeum zg30 : 13C 110.000 ppm; 1H 4.500 ppm \*.  
 \_CarbonBC CDCl3 /opt/users/wux1 wux1 10

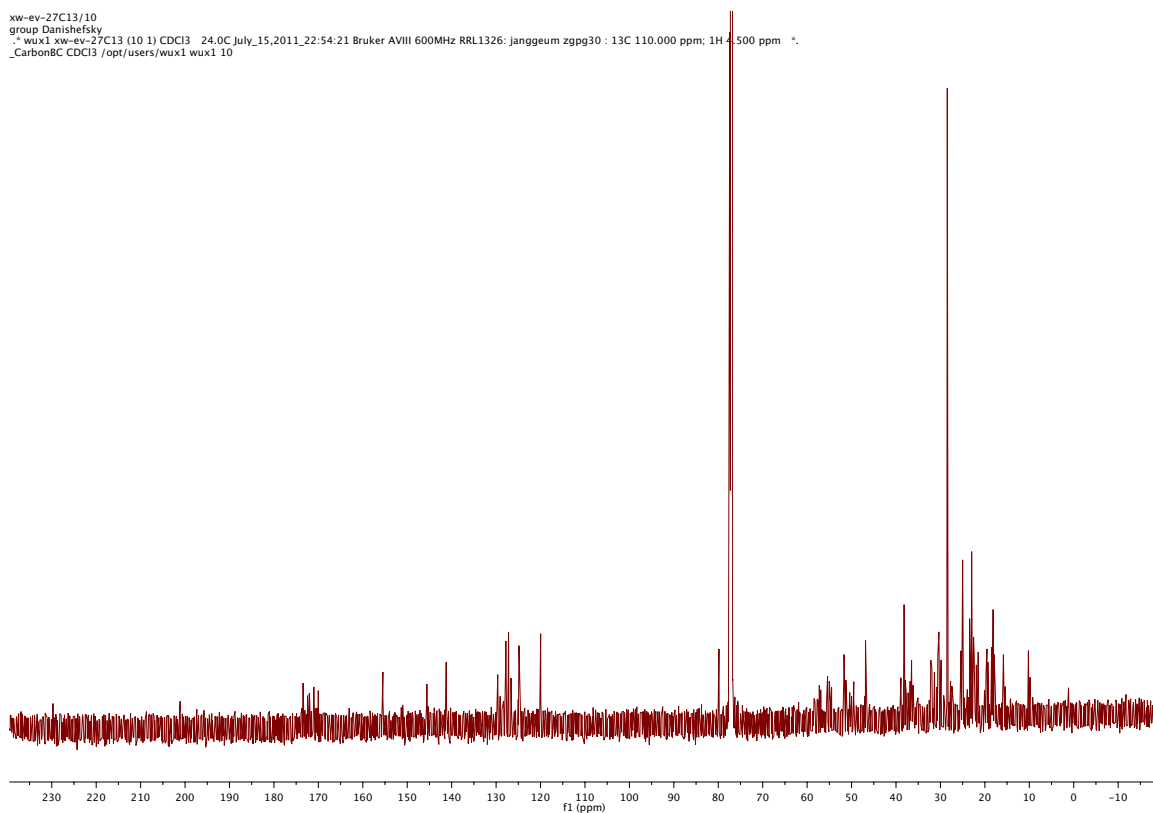

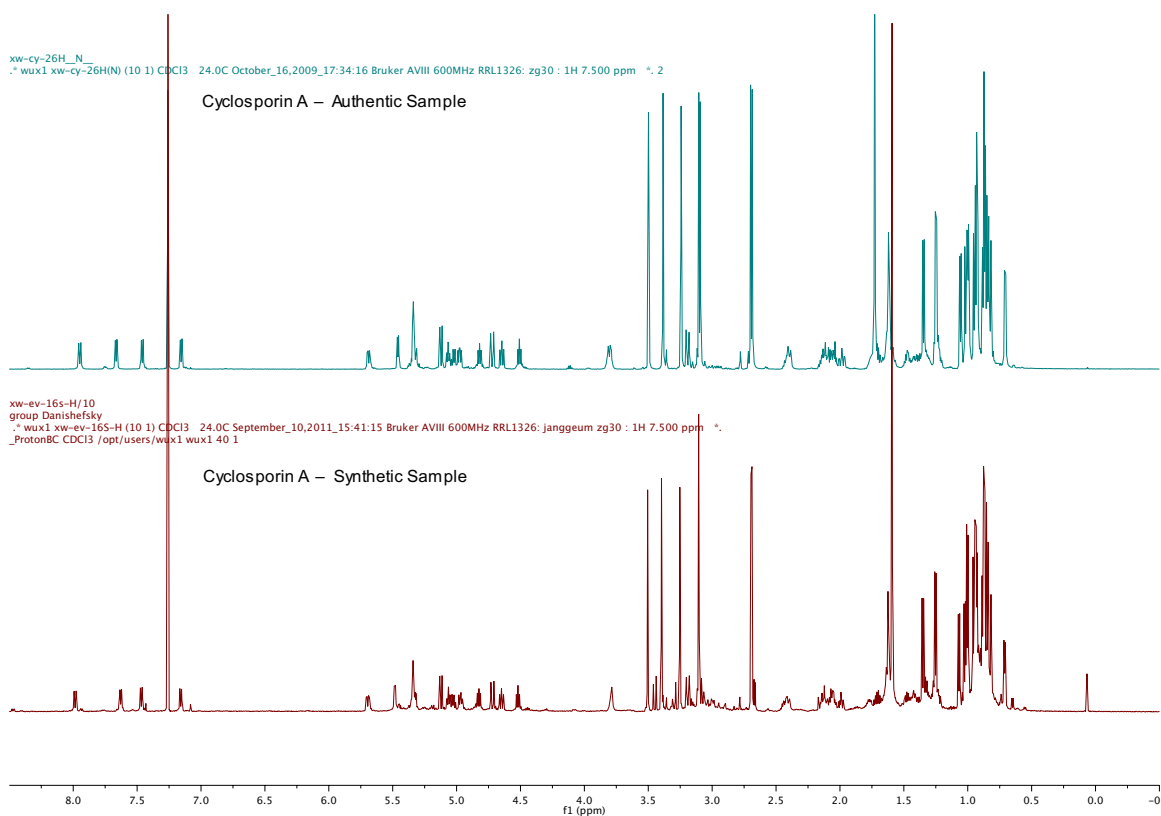

<sup>1</sup>H NMR Spectrum of synthetic (bottom) and natural (top) Cyclosporin A (1) in CDCl<sub>3</sub> at 600 MHz.

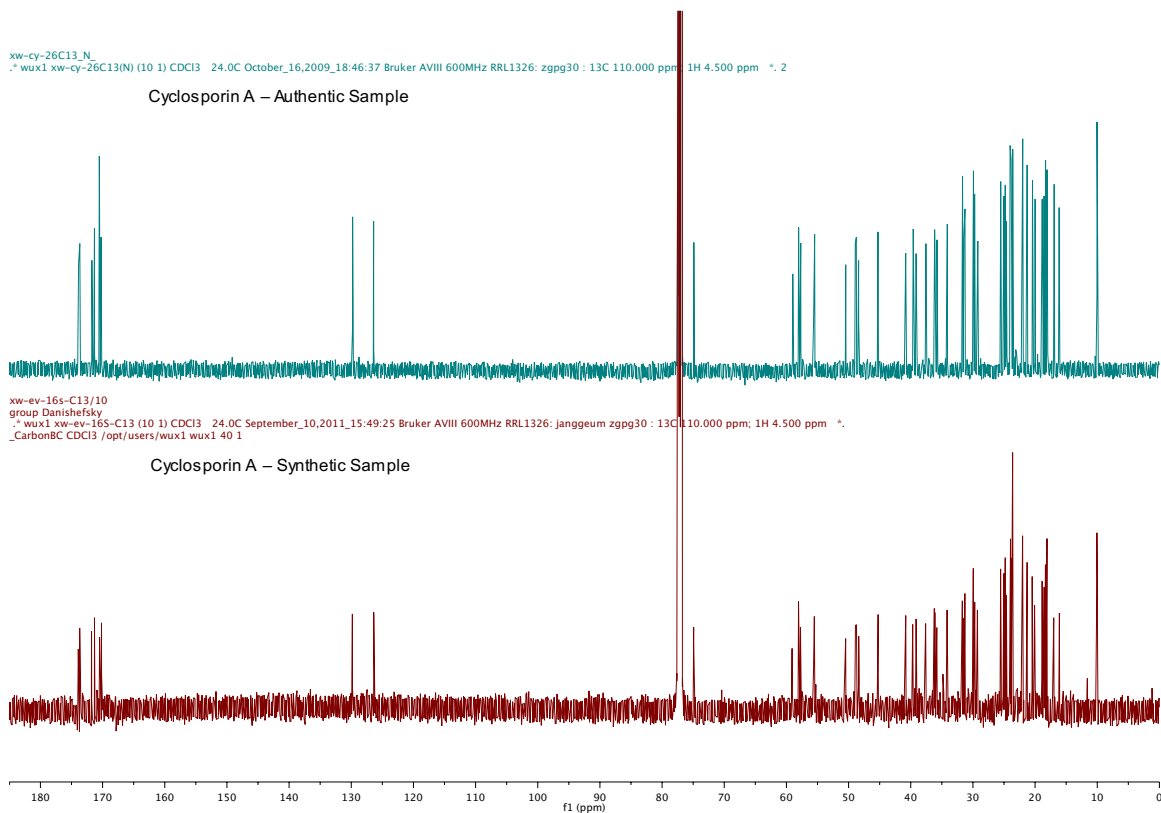

<sup>13</sup>C NMR Spectrum of synthetic (bottom) and natural (top) Cyclosporin A (1) in CDCl<sub>3</sub> at 151 MHz.

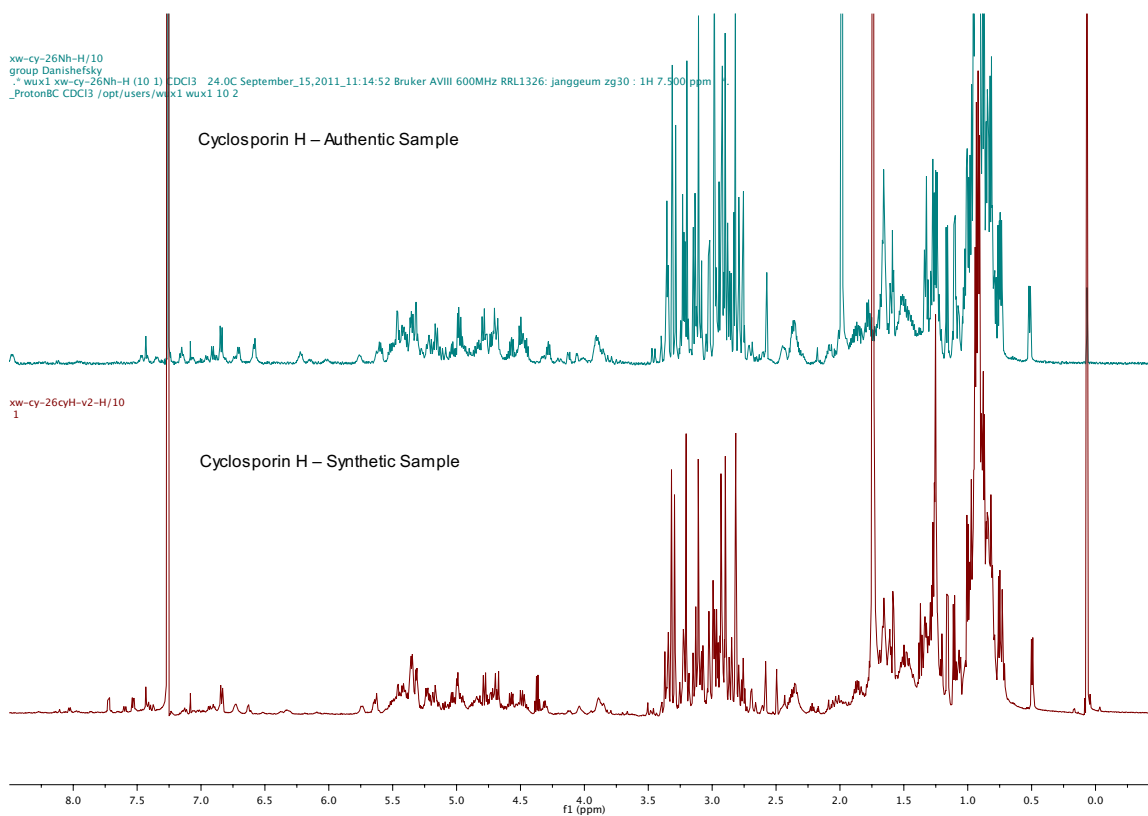

$^1\text{H}$  NMR Spectrum of synthetic (bottom) and natural (top) **Cyclosporin H (28)** in  $\text{CDCl}_3$  at 600 MHz.
